# Supplementary material for: Monocyte subpopulations display disease-specific miRNA signatures depending on the subform of Spondyloarthropathy
Source: Front Immunol. 2023 Apr 17;14:1124894. doi: 10.3389/fimmu.2023.1124894 (PMC10149963; doi:10.3389/fimmu.2023.1124894)
Supplement: Supplementary File 4 — Spreadsheets presenting associations between differentially expressed miRNAs themselves in classical, intermediate and non-classical monocyte. [file Table_1.xlsx]

## Sheet: Intro
	TaqMan® Array MicroRNA Cards, TaqMan® OpenArray® MicroRNA Plates and Megaplex™ Primer Pools
	Target List File (TLF)
	Date: 7/10/2019
	Version 22
	The TaqMan® Array MicroRNA Cards and TaqMan® OpenArray® MicroRNA Plates, with matching Megaplex™ Pools of RT and optional PreAmp primers, allow simultaneuous quantitation of the biologically most relevant miRNAs in miRBase
	The number of assays from the current release of miRBase (i.e. v22) is shown in the table below
	Contents of the TaqMan® Array MicroRNA Cards, TaqMan® OpenArray® MicroRNA Plates and Megaplex™ Primer Pools, with miRBase mapping details, are shown in the respective tabs
				Number of Assays current with miRBase v22 (TaqMan® Array MicroRNA Cards, TaqMan® OpenArray® MicroRNA Plates)
				Species	Pool/Card	Total	Controls
				Human	A	372	7
					B	375	7

## Sheet: Human A
Well Number	Well Name	Assay ID	Assay Name	Control Assay	Assay Target Sequence	miRBase ID (v22) or NCBI Name (for Controls)	miRBase Alias
1	A1	000377	hsa-let-7a		UGAGGUAGUAGGUUGUAUAGUU	hsa-let-7a-5p	hsa-let-7a(17)
2	A2	000379	hsa-let-7c		UGAGGUAGUAGGUUGUAUGGUU	hsa-let-7c-5p	hsa-let-7c(19)
3	A3	002283	hsa-let-7d		AGAGGUAGUAGGUUGCAUAGUU	hsa-let-7d-5p	hsa-let-7d(17)
4	A4	002406	hsa-let-7e		UGAGGUAGGAGGUUGUAUAGUU	hsa-let-7e-5p	hsa-let-7e(17)
5	A5	000382	hsa-let-7f		UGAGGUAGUAGAUUGUAUAGUU	hsa-let-7f-5p	hsa-let-7f(17)
6	A6	002282	hsa-let-7g		UGAGGUAGUAGUUUGUACAGUU	hsa-let-7g-5p	hsa-let-7g(17)
7	A7	002222	hsa-miR-1		UGGAAUGUAAAGAAGUAUGUAU	hsa-miR-1	NA
8	A8	000583	hsa-miR-9		UCUUUGGUUAUCUAGCUGUAUGA	hsa-miR-9-5p	hsa-miR-9(17)
9	A9	000387	hsa-miR-10a		UACCCUGUAGAUCCGAAUUUGUG	hsa-miR-10a-5p	hsa-miR-10a(17)
10	A10	002218	hsa-miR-10b		UACCCUGUAGAACCGAAUUUGUG	hsa-miR-10b-5p	hsa-miR-10b(17)
11	A11	001973	U6 snRNA	+	GUGCUCGCUUCGGCAGCACAUAUACUAAAAUUGGAACGAUACAGAGAAGAUUAGCAUGGCCCCUGCGCAAGGAUGACACGCAAAUUCGUGAAGCGUUCCAUAUUUU	U6 snRNA	NA
12	A12	001973	U6 snRNA	+	GUGCUCGCUUCGGCAGCACAUAUACUAAAAUUGGAACGAUACAGAGAAGAUUAGCAUGGCCCCUGCGCAAGGAUGACACGCAAAUUCGUGAAGCGUUCCAUAUUUU	U6 snRNA	NA
13	A13	000389	hsa-miR-15a		UAGCAGCACAUAAUGGUUUGUG	hsa-miR-15a-5p	hsa-miR-15a(17)
14	A14	000390	hsa-miR-15b		UAGCAGCACAUCAUGGUUUACA	hsa-miR-15b-5p	hsa-miR-15b(17)
15	A15	000391	hsa-miR-16		UAGCAGCACGUAAAUAUUGGCG	hsa-miR-16-5p	hsa-miR-16(17)
16	A16	002308	hsa-miR-17		CAAAGUGCUUACAGUGCAGGUAG	hsa-miR-17-5p	hsa-miR-17(17)
17	A17	002422	hsa-miR-18a		UAAGGUGCAUCUAGUGCAGAUAG	hsa-miR-18a-5p	hsa-miR-18a(17)
18	A18	002217	hsa-miR-18b		UAAGGUGCAUCUAGUGCAGUUAG	hsa-miR-18b-5p	hsa-miR-18b(17)
19	A19	000395	hsa-miR-19a		UGUGCAAAUCUAUGCAAAACUGA	hsa-miR-19a-3p	hsa-miR-19a(17)
20	A20	000396	hsa-miR-19b		UGUGCAAAUCCAUGCAAAACUGA	hsa-miR-19b-3p	hsa-miR-19b(17)
21	A21	000580	hsa-miR-20a		UAAAGUGCUUAUAGUGCAGGUAG	hsa-miR-20a-5p	hsa-miR-20(6), hsa-miR-20a(17)
22	A22	001014	hsa-miR-20b		CAAAGUGCUCAUAGUGCAGGUAG	hsa-miR-20b-5p	hsa-miR-20b(17)
23	A23	000397	hsa-miR-21		UAGCUUAUCAGACUGAUGUUGA	hsa-miR-21-5p	hsa-miR-21(17)
24	A24	000398	hsa-miR-22		AAGCUGCCAGUUGAAGAACUGU	hsa-miR-22-3p	hsa-miR-22(17)
25	B1	000399	hsa-miR-23a		AUCACAUUGCCAGGGAUUUCC	hsa-miR-23a-3p	hsa-miR-23a(17)
26	B2	000400	hsa-miR-23b		AUCACAUUGCCAGGGAUUACC	hsa-miR-23b-3p	hsa-miR-23b(17)
27	B3	000402	hsa-miR-24		UGGCUCAGUUCAGCAGGAACAG	hsa-miR-24-3p	hsa-miR-24(17)
28	B4	000403	hsa-miR-25		CAUUGCACUUGUCUCGGUCUGA	hsa-miR-25-3p	hsa-miR-25(17)
29	B5	000405	hsa-miR-26a		UUCAAGUAAUCCAGGAUAGGCU	hsa-miR-26a-5p	hsa-miR-26a(17)
30	B6	000407	hsa-miR-26b		UUCAAGUAAUUCAGGAUAGGU	hsa-miR-26b-5p	hsa-miR-26b(17)
31	B7	000408	hsa-miR-27a		UUCACAGUGGCUAAGUUCCGC	hsa-miR-27a-3p	hsa-miR-27a(17)
32	B8	000409	hsa-miR-27b		UUCACAGUGGCUAAGUUCUGC	hsa-miR-27b-3p	hsa-miR-27b(17)
33	B9	002446	hsa-miR-28-3p		CACUAGAUUGUGAGCUCCUGGA	hsa-miR-28-3p	NA
34	B10	000411	hsa-miR-28		AAGGAGCUCACAGUCUAUUGAG	hsa-miR-28-5p	hsa-miR-28(9.2)
35	B11	001973	U6 snRNA	+	GUGCUCGCUUCGGCAGCACAUAUACUAAAAUUGGAACGAUACAGAGAAGAUUAGCAUGGCCCCUGCGCAAGGAUGACACGCAAAUUCGUGAAGCGUUCCAUAUUUU	U6 snRNA	NA
36	B12	001973	U6 snRNA	+	GUGCUCGCUUCGGCAGCACAUAUACUAAAAUUGGAACGAUACAGAGAAGAUUAGCAUGGCCCCUGCGCAAGGAUGACACGCAAAUUCGUGAAGCGUUCCAUAUUUU	U6 snRNA	NA
37	B13	002112	hsa-miR-29a		UAGCACCAUCUGAAAUCGGUUA	hsa-miR-29a-3p	hsa-miR-29a(17)
38	B14	000413	hsa-miR-29b		UAGCACCAUUUGAAAUCAGUGUU	hsa-miR-29b-3p	hsa-miR-29b(17)
39	B15	000587	hsa-miR-29c		UAGCACCAUUUGAAAUCGGUUA	hsa-miR-29c-3p	hsa-miR-29c(17)
40	B16	000602	hsa-miR-30b		UGUAAACAUCCUACACUCAGCU	hsa-miR-30b-5p	hsa-miR-30b(17)
41	B17	000419	hsa-miR-30c		UGUAAACAUCCUACACUCUCAGC	hsa-miR-30c-5p	hsa-miR-30c(17)
42	B18	002279	hsa-miR-31		AGGCAAGAUGCUGGCAUAGCU	hsa-miR-31-5	hsa-miR-31(17)
43	B19	002109	hsa-miR-32		UAUUGCACAUUACUAAGUUGCA	hsa-miR-32-5p	hsa-miR-32(17)
44	B20	002085	hsa-miR-33b		GUGCAUUGCUGUUGCAUUGC	hsa-miR-33b-5p	hsa-miR-33b(17)
45	B21	000426	hsa-miR-34a		UGGCAGUGUCUUAGCUGGUUGU	hsa-miR-34a-5p	hsa-miR-34a(17)
46	B22	000428	hsa-miR-34c		AGGCAGUGUAGUUAGCUGAUUGC	hsa-miR-34c-5p	hsa-miR-34c(9.2)
47	B23	000431	hsa-miR-92a		UAUUGCACUUGUCCCGGCCUGU	hsa-miR-92a-3p	hsa-miR-92(5), hsa-miR-92a(17)
48	B24	001090	mmu-miR-93		CAAAGUGCUGUUCGUGCAGGUAG	hsa-miR-93-5p	hsa-miR-93(17)
49	C1	000433	hsa-miR-95		UUCAACGGGUAUUUAUUGAGCA	hsa-miR-95-3p	hsa-miR-95(19)
50	C2	000186	mmu-miR-96		UUUGGCACUAGCACAUUUUUGCU	hsa-miR-96-5p	hsa-miR-96(17)
51	C3	000577	hsa-miR-98		UGAGGUAGUAAGUUGUAUUGUU	hsa-miR-98-5p	hsa-miR-98(18)
52	C4	000435	hsa-miR-99a		AACCCGUAGAUCCGAUCUUGUG	hsa-miR-99a-5p	hsa-miR-99a(17)
53	C5	000436	hsa-miR-99b		CACCCGUAGAACCGACCUUGCG	hsa-miR-99b-5p	hsa-miR-99b(17)
54	C6	000437	hsa-miR-100		AACCCGUAGAUCCGAACUUGUG	hsa-miR-100-5p	hsa-miR-100(17)
55	C7	002253	hsa-miR-101		UACAGUACUGUGAUAACUGAA	hsa-miR-101-3p	hsa-miR-101(17)
56	C8	000439	hsa-miR-103		AGCAGCAUUGUACAGGGCUAUGA	hsa-miR-103a-3p	hsa-miR-103(16), hsa-miR-103a(17)
57	C9	002167	hsa-miR-105		UCAAAUGCUCAGACUCCUGUGGU	hsa-miR-105-5p	hsa-miR-105(17)
58	C10	002169	hsa-miR-106a		AAAAGUGCUUACAGUGCAGGUAG	hsa-miR-106a-5p	hsa-miR-106a(17)
59	C11	001094	RNU44	+	CCUGGAUGAUGAUAGCAAAUGCUGACUGAACAUGAAGGUCUUAAUUAGCUCUAACUGACU	RNU44	NA
60	C12	000442	hsa-miR-106b		UAAAGUGCUGACAGUGCAGAU	hsa-miR-106b-5p	hsa-miR-106b(17)
61	C13	000443	hsa-miR-107		AGCAGCAUUGUACAGGGCUAUCA	hsa-miR-107	NA
62	C14	002245	hsa-miR-122		UGGAGUGUGACAAUGGUGUUUG	hsa-miR-122-5p	hsa-miR-122(17)
63	C15	001182	mmu-miR-124a		UAAGGCACGCGGUGAAUGCC	hsa-miR-124-3p	hsa-miR-124(17)
64	C16	002199	hsa-miR-125a-3p		ACAGGUGAGGUUCUUGGGAGCC	hsa-miR-125a-3p	NA
65	C17	002198	hsa-miR-125a-5p		UCCCUGAGACCCUUUAACCUGUGA	hsa-miR-125a-5p	NA
66	C18	000449	hsa-miR-125b		UCCCUGAGACCCUAACUUGUGA	hsa-miR-125b-5p	hsa-miR-125b(17)
67	C19	002228	hsa-miR-126		UCGUACCGUGAGUAAUAAUGCG	hsa-miR-126-3p	hsa-miR-126(17)
68	C20	000452	hsa-miR-127		UCGGAUCCGUCUGAGCUUGGCU	hsa-miR-127-3p	hsa-miR-127(9.2)
69	C21	002229	hsa-miR-127-5p		CUGAAGCUCAGAGGGCUCUGAU	hsa-miR-127-5p	NA
70	C22	002216	hsa-miR-128a		UCACAGUGAACCGGUCUCUUU	hsa-miR-128-3p	hsa-miR-128(19), hsa-miR-128a(10), hsa-miR-128b(10)
71	C23	001184	mmu-miR-129-3p		AAGCCCUUACCCCAAAAAGCAU	hsa-miR-129-2-3p	hsa-miR-129-3p(17)
72	C24	000590	hsa-miR-129		CUUUUUGCGGUCUGGGCUUGC	hsa-miR-129-5p	hsa-miR-129(9.2)
73	D1	000454	hsa-miR-130a		CAGUGCAAUGUUAAAAGGGCAU	hsa-miR-130a-3p	hsa-miR-130a(17)
74	D2	000456	hsa-miR-130b		CAGUGCAAUGAUGAAAGGGCAU	hsa-miR-130b-3p	hsa-miR-130b(17)
75	D3	000457	hsa-miR-132		UAACAGUCUACAGCCAUGGUCG	hsa-miR-132-3p	hsa-miR-132(17)
76	D4	002246	hsa-miR-133a		UUUGGUCCCCUUCAACCAGCUG	hsa-miR-133a-3p	hsa-miR-133a(19)
77	D5	002247	hsa-miR-133b		UUUGGUCCCCUUCAACCAGCUA	hsa-miR-133b	NA
78	D6	001186	mmu-miR-134		UGUGACUGGUUGACCAGAGGGG	hsa-miR-134-5p	hsa-miR-134(19)
79	D7	000460	hsa-miR-135a		UAUGGCUUUUUAUUCCUAUGUGA	hsa-miR-135a-5p	hsa-miR-135(3), hsa-miR-135a(17)
80	D8	002261	hsa-miR-135b		UAUGGCUUUUCAUUCCUAUGUGA	hsa-miR-135b-5p	hsa-miR-135b(17)
81	D9	000592	hsa-miR-136		ACUCCAUUUGUUUUGAUGAUGGA	hsa-miR-136-5p	hsa-miR-136(17)
82	D10	001129	mmu-miR-137		UUAUUGCUUAAGAAUACGCGUAG	hsa-miR-137	NA
83	D11	002284	hsa-miR-138		AGCUGGUGUUGUGAAUCAGGCCG	hsa-miR-138-5p	hsa-miR-138(17)
84	D12	002313	hsa-miR-139-3p		GGAGACGCGGCCCUGUUGGAGU	NA	hsa-miR-139-3p(18)
85	D13	002289	hsa-miR-139-5p		UCUACAGUGCACGUGUCUCCAG	NA	hsa-miR-139-5p(18)
86	D14	002234	hsa-miR-140-3p		UACCACAGGGUAGAACCACGG	hsa-miR-140-3p	NA
87	D15	001187	mmu-miR-140		CAGUGGUUUUACCCUAUGGUAG	hsa-miR-140-5p	NA
88	D16	000463	hsa-miR-141		UAACACUGUCUGGUAAAGAUGG	hsa-miR-141-3p	hsa-miR-141(17)
89	D17	000464	hsa-miR-142-3p		UGUAGUGUUUCCUACUUUAUGGA	hsa-miR-142-3p	NA
90	D18	002248	hsa-miR-142-5p		CAUAAAGUAGAAAGCACUACU	hsa-miR-142-5p	NA
91	D19	002249	hsa-miR-143		UGAGAUGAAGCACUGUAGCUC	hsa-miR-143-3p	hsa-miR-143(17)
92	D20	002278	hsa-miR-145		GUCCAGUUUUCCCAGGAAUCCCU	hsa-miR-145-5p	hsa-miR-145(17)
93	D21	000468	hsa-miR-146a		UGAGAACUGAAUUCCAUGGGUU	hsa-miR-146a-5p	hsa-miR-146(6), hsa-miR-146a(17)
94	D22	002361	hsa-miR-146b-3p		UGCCCUGUGGACUCAGUUCUGG	hsa-miR-146b-3p	NA
95	D23	001097	hsa-miR-146b		UGAGAACUGAAUUCCAUAGGCU	hsa-miR-146b-5p	hsa-miR-146b(9.2)
96	D24	002262	hsa-miR-147b		GUGUGCGGAAAUGCUUCUGCUA	hsa-miR-147b	NA
97	E1	000470	hsa-miR-148a		UCAGUGCACUACAGAACUUUGU	hsa-miR-148a-3p	hsa-miR-148(3), hsa-miR-148a(17)
98	E2	000471	hsa-miR-148b		UCAGUGCAUCACAGAACUUUGU	hsa-miR-148b-3p	hsa-miR-148b(17)
99	E3	002255	hsa-miR-149		UCUGGCUCCGUGUCUUCACUCCC	hsa-miR-149-5p	hsa-miR-149(17)
100	E4	000473	hsa-miR-150		UCUCCCAACCCUUGUACCAGUG	hsa-miR-150-5p	hsa-miR-150(17)
101	E5	000475	hsa-miR-152		UCAGUGCAUGACAGAACUUGG	hsa-miR-152-3p	hsa-miR-152(19)
102	E6	001191	mmu-miR-153		UUGCAUAGUCACAAAAGUGAUC	hsa-miR-153-3p	hsa-miR-153(19)
103	E7	000477	hsa-miR-154		UAGGUUAUCCGUGUUGCCUUCG	hsa-miR-154-5p	hsa-miR-154(17)
104	E8	000480	hsa-miR-181a		AACAUUCAACGCUGUCGGUGAGU	hsa-miR-181a-5p	hsa-miR-181a(17)
105	E9	000482	hsa-miR-181c		AACAUUCAACCUGUCGGUGAGU	hsa-miR-181c-5p	hsa-miR-181c(17)
106	E10	002334	hsa-miR-182		UUUGGCAAUGGUAGAACUCACACU	hsa-miR-182-5p	hsa-miR-182(17)
107	E11	001006	RNU48	+	GAUGACCCCAGGUAACUCUGAGUGUGUCGCUGAUGCCAUCACCGCAGCGCUCUGACC	RNU48	NA
108	E12	002269	hsa-miR-183		UAUGGCACUGGUAGAAUUCACU	hsa-miR-183-5p	hsa-miR-183(17)
109	E13	000485	hsa-miR-184		UGGACGGAGAACUGAUAAGGGU	hsa-miR-184	NA
110	E14	002271	hsa-miR-185		UGGAGAGAAAGGCAGUUCCUGA	hsa-miR-185-5p	hsa-miR-185(17)
111	E15	002285	hsa-miR-186		CAAAGAAUUCUCCUUUUGGGCU	hsa-miR-186-5p	hsa-miR-186(17)
112	E16	001193	mmu-miR-187		UCGUGUCUUGUGUUGCAGCCGG	hsa-miR-187-3p	hsa-miR-187(17)
113	E17	002106	hsa-miR-188-3p		CUCCCACAUGCAGGGUUUGCA	hsa-miR-188-3p	NA
114	E18	000489	hsa-miR-190		UGAUAUGUUUGAUAUAUUAGGU	hsa-miR-190a-5p	hsa-miR-190(17), hsa-miR-190a(19)
115	E19	002299	hsa-miR-191		CAACGGAAUCCCAAAAGCAGCUG	hsa-miR-191-5p	hsa-miR-191(17)
116	E20	000491	hsa-miR-192		CUGACCUAUGAAUUGACAGCC	hsa-miR-192-5p	hsa-miR-192(17)
117	E21	002250	hsa-miR-193a-3p		AACUGGCCUACAAAGUCCCAGU	hsa-miR-193a-3p	NA
118	E22	002281	hsa-miR-193a-5p		UGGGUCUUUGCGGGCGAGAUGA	hsa-miR-193a-5p	NA
119	E23	002367	hsa-miR-193b		AACUGGCCCUCAAAGUCCCGCU	hsa-miR-193b-3p	hsa-miR-193b(17)
120	E24	000493	hsa-miR-194		UGUAACAGCAACUCCAUGUGGA	hsa-miR-194-5p	hsa-miR-194(17)
121	F1	000494	hsa-miR-195		UAGCAGCACAGAAAUAUUGGC	hsa-miR-195-5p	hsa-miR-195(17)
122	F2	002215	hsa-miR-196b		UAGGUAGUUUCCUGUUGUUGGG	hsa-miR-196b-5p	hsa-miR-196b(17)
123	F3	000497	hsa-miR-197		UUCACCACCUUCUCCACCCAGC	hsa-miR-197-3p	hsa-miR-197(17)
124	F4	002273	hsa-miR-198		GGUCCAGAGGGGAGAUAGGUUC	hsa-miR-19	NA
125	F5	000498	hsa-miR-199a		CCCAGUGUUCAGACUACCUGUUC	hsa-miR-199a-5p	hsa-miR-199a(9.2)
126	F6	002304	hsa-miR-199a-3p		ACAGUAGUCUGCACAUUGGUUA	hsa-miR-199a-3p	NA
127	F7	000500	hsa-miR-199b		CCCAGUGUUUAGACUAUCUGUUC	hsa-miR-199b-5p	hsa-miR-199b(9.2)
128	F8	000502	hsa-miR-200a		UAACACUGUCUGGUAACGAUGU	hsa-miR-200a-3p	hsa-miR-200a(17)
129	F9	002251	hsa-miR-200b		UAAUACUGCCUGGUAAUGAUGA	hsa-miR-200b-3p	hsa-miR-200b(17)
130	F10	002300	hsa-miR-200c		UAAUACUGCCGGGUAAUGAUGGA	hsa-miR-200c-3p	hsa-miR-200c(17)
131	F11	002363	hsa-miR-202		AGAGGUAUAGGGCAUGGGAA	hsa-miR-202-3p	hsa-miR-202(17)
132	F12	000507	hsa-miR-203		GUGAAAUGUUUAGGACCACUAG	hsa-miR-203a	hsa-miR-203(18)
133	F13	000508	hsa-miR-204		UUCCCUUUGUCAUCCUAUGCCU	hsa-miR-204-5p	hsa-miR-204(17)
134	F14	000509	hsa-miR-205		UCCUUCAUUCCACCGGAGUCUG	hsa-miR-205-5p	hsa-miR-205(17)
135	F15	002290	hsa-miR-208b		AUAAGACGAACAAAAGGUUUGU	hsa-miR-208b-3p	hsa-miR-208b(19)
136	F16	000512	hsa-miR-210		CUGUGCGUGUGACAGCGGCUGA	hsa-miR-210-3p	hsa-miR-210(19)
137	F17	002306	hsa-miR-214		ACAGCAGGCACAGACAGGCAGU	hsa-miR-214-3p	hsa-miR-214(17)
138	F18	000518	hsa-miR-215		AUGACCUAUGAAUUGACAGAC	hsa-miR-215-5p	hsa-miR-215(19)
139	F19	002220	hsa-miR-216a		UAAUCUCAGCUGGCAACUGUGA	hsa-miR-216a-5p	hsa-miR-216a(18)
140	F20	002326	hsa-miR-216b		AAAUCUCUGCAGGCAAAUGUGA	hsa-miR-216b-5p	hsa-miR-216b(19)
141	F21	002337	hsa-miR-217		UACUGCAUCAGGAACUGAUUGGA	hsa-miR-217	NA
142	F22	000521	hsa-miR-218		UUGUGCUUGAUCUAACCAUGU	hsa-miR-218-5p	hsa-miR-218(17)
143	F23	000522	hsa-miR-219		UGAUUGUCCAAACGCAAUUCU	hsa-miR-219a-5p	hsa-miR-219(9.2), hsa-miR-219-5p(19)
144	F24	000524	hsa-miR-221		AGCUACAUUGUCUGCUGGGUUUC	hsa-miR-221-3p	hsa-miR-221(17)
145	G1	002276	hsa-miR-222		AGCUACAUCUGGCUACUGGGU	hsa-miR-222-3p	hsa-miR-222(17)
146	G2	002295	hsa-miR-223		UGUCAGUUUGUCAAAUACCCCA	hsa-miR-223-3p	hsa-miR-223(17)
147	G3	002099	hsa-miR-224		CAAGUCACUAGUGGUUCCGUU	hsa-miR-224-5	hsa-miR-224(17)
148	G4	002101	hsa-miR-296-3p		GAGGGUUGGGUGGAGGCUCUCC	hsa-miR-296-3p	NA
149	G5	000527	hsa-miR-296		AGGGCCCCCCCUCAAUCCUGU	hsa-miR-296-5p	hsa-miR-296(9.2)
150	G6	001015	hsa-miR-299-3p		UAUGUGGGAUGGUAAACCGCUU	hsa-miR-299-3	NA
151	G7	000600	hsa-miR-299-5p		UGGUUUACCGUCCCACAUACAU	hsa-miR-299-5p	hsa-miR-299(6)
152	G8	000528	hsa-miR-301		CAGUGCAAUAGUAUUGUCAAAGC	hsa-miR-301a-3p	hsa-miR-301(9.2), hsa-miR-301a(17)
153	G9	002392	hsa-miR-301b		CAGUGCAAUGAUAUUGUCAAAGC	hsa-miR-301b	NA
154	G10	000529	hsa-miR-302a		UAAGUGCUUCCAUGUUUUGGUGA	hsa-miR-302a-3p	hsa-miR-302(3.1), hsa-miR-302a(17)
155	G11	000338	ath-miR159a	++	UUUGGAUUGAAGGGAGCUCUA	ath-miR159a	NA
156	G12	000531	hsa-miR-302b		UAAGUGCUUCCAUGUUUUAGUAG	hsa-miR-302b-3p	hsa-miR-302b(17)
157	G13	000533	hsa-miR-302c		UAAGUGCUUCCAUGUUUCAGUGG	hsa-miR-302c-3p	hsa-miR-302c(17)
158	G14	002277	hsa-miR-320		AAAAGCUGGGUUGAGAGGGCGA	hsa-miR-320a	hsa-miR-320(10.1)
159	G15	002227	hsa-miR-323-3p		CACAUUACACGGUCGACCUCU	hsa-miR-323a-3p	hsa-miR-323-3p(17)
160	G16	002161	hsa-miR-324-3p		ACUGCCCCAGGUGCUGCUGG	hsa-miR-324-3p	NA
161	G17	000539	hsa-miR-324-5p		CGCAUCCCCUAGGGCAUUGGUGU	hsa-miR-324-5p	NA
162	G18	000542	hsa-miR-326		CCUCUGGGCCCUUCCUCCAG	hsa-miR-326	NA
163	G19	000543	hsa-miR-328		CUGGCCCUCUCUGCCCUUCCGU	hsa-miR-328-3p	hsa-miR-328(19)
164	G20	001101	hsa-miR-329		AACACACCUGGUUAACCUCUUU	hsa-miR-329-3p	hsa-miR-329(19)
165	G21	000544	hsa-miR-330		GCAAAGCACACGGCCUGCAGAGA	hsa-miR-330-3p	hsa-miR-330(9.2)
166	G22	002230	hsa-miR-330-5p		UCUCUGGGCCUGUGUCUUAGGC	hsa-miR-330-5p	NA
167	G23	000545	hsa-miR-331		GCCCCUGGGCCUAUCCUAGAA	hsa-miR-331-3p	hsa-miR-331(9.2)
168	G24	002233	hsa-miR-331-5p		CUAGGUAUGGUCCCAGGGAUCC	hsa-miR-331-5p	NA
169	H1	000546	hsa-miR-335		UCAAGAGCAAUAACGAAAAAUGU	hsa-miR-335-5p	hsa-miR-335(17)
170	H2	002156	hsa-miR-337-5p		GAACGGCUUCAUACAGGAGUU	hsa-miR-337-5p	NA
171	H3	002252	hsa-miR-338-3p		UCCAGCAUCAGUGAUUUUGUUG	hsa-miR-338-3p	NA
172	H4	002184	hsa-miR-339-3p		UGAGCGCCUCGACGACAGAGCCG	hsa-miR-339-3p	NA
173	H5	002257	hsa-miR-339-5p		UCCCUGUCCUCCAGGAGCUCACG	hsa-miR-339-5p	NA
174	H6	002258	hsa-miR-340		UUAUAAAGCAAUGAGACUGAUU	hsa-miR-340-5p	hsa-miR-340(17)
175	H7	002623	hsa-miR-155		UUAAUGCUAAUCGUGAUAGGGGU	hsa-miR-155-5p	hsa-miR-155(17)
176	H8	002619	hsa-let-7b		UGAGGUAGUAGGUUGUGUGGUU	hsa-let-7b-5p	hsa-let-7b(17)
177	H9	002260	hsa-miR-342-3p		UCUCACACAGAAAUCGCACCCGU	hsa-miR-342-3p	NA
178	H10	002147	hsa-miR-342-5p		AGGGGUGCUAUCUGUGAUUGA	hsa-miR-342-5p	NA
179	H11	002186	hsa-miR-345		GCUGACUCCUAGUCCAGGGCUC	hsa-miR-345-5p	hsa-miR-345(17)
180	H12	000554	hsa-miR-361		UUAUCAGAAUCUCCAGGGGUAC	hsa-miR-361-5p	hsa-miR-361(9.2)
181	H13	002117	hsa-miR-362-3p		AACACACCUAUUCAAGGAUUCA	hsa-miR-362-3p	NA
182	H14	001273	hsa-miR-362		AAUCCUUGGAACCUAGGUGUGAGU	hsa-miR-362-5p	hsa-miR-362(9.2)
183	H15	001271	hsa-miR-363		AAUUGCACGGUAUCCAUCUGUA	hsa-miR-363-3p	hsa-miR-363(17)
184	H16	001020	hsa-miR-365		UAAUGCCCCUAAAAAUCCUUAU	hsa-miR-365a-3p	hsa-miR-365(17)
185	H17	000555	hsa-miR-367		AAUUGCACUUUAGCAAUGGUGA	hsa-miR-367-3p	hsa-miR-367(17)
186	H18	000557	hsa-miR-369-3p		AAUAAUACAUGGUUGAUCUUU	hsa-miR-369-3p	hsa-miR-369(6)
187	H19	001021	hsa-miR-369-5p		AGAUCGACCGUGUUAUAUUCGC	hsa-miR-369-5p	NA
188	H20	002275	hsa-miR-370		GCCUGCUGGGGUGGAACCUGGU	hsa-miR-370-3p	hsa-miR-370(19)
189	H21	002124	hsa-miR-371-3p		AAGUGCCGCCAUCUUUUGAGUGU	hsa-miR-371a-3p	hsa-miR-371-3p(17)
190	H22	000560	hsa-miR-372		AAAGUGCUGCGACAUUUGAGCGU	hsa-miR-372-3p	hsa-miR-372(19)
191	H23	000561	hsa-miR-373		GAAGUGCUUCGAUUUUGGGGUGU	hsa-miR-373-3p	hsa-miR-373(17)
192	H24	000563	hsa-miR-374		UUAUAAUACAACCUGAUAAGUG	hsa-miR-374a-5p	hsa-miR-374(9.2), hsa-miR-374a(17)
193	I1	001319	mmu-miR-374-5p		AUAUAAUACAACCUGCUAAGUG	hsa-miR-374b-5p	hsa-miR-374b(17)
194	I2	000564	hsa-miR-375		UUUGUUCGUUCGGCUCGCGUGA	hsa-miR-375	NA
195	I3	000565	hsa-miR-376a		AUCAUAGAGGAAAAUCCACGU	hsa-miR-376a-3p	hsa-miR-376a(17)
196	I4	001102	hsa-miR-376b		AUCAUAGAGGAAAAUCCAUGUU	hsa-miR-376b-3p	hsa-miR-376b(18)
197	I5	000566	hsa-miR-377		AUCACACAAAGGCAACUUUUGU	hsa-miR-377-3p	hsa-miR-377(17)
198	I6	001138	mmu-miR-379		UGGUAGACUAUGGAACGUAGG	hsa-miR-379-5p	hsa-miR-379(17)
199	I7	000569	hsa-miR-380-3p		UAUGUAAUAUGGUCCACAUCUU	hsa-miR-380-3p	hsa-miR-380(17)
200	I8	000571	hsa-miR-381		UAUACAAGGGCAAGCUCUCUGU	hsa-miR-381-3p	hsa-miR-381(18)
201	I9	000572	hsa-miR-382		GAAGUUGUUCGUGGUGGAUUCG	hsa-miR-382-5p	hsa-miR-382(17)
202	I10	000573	hsa-miR-383		AGAUCAGAAGGUGAUUGUGGCU	hsa-miR-383-5p	hsa-miR-383(19)
203	I11	002331	hsa-miR-409-5p		AGGUUACCCGAGCAACUUUGCAU	hsa-miR-409-5p	NA
204	I12	001274	hsa-miR-410		AAUAUAACACAGAUGGCCUGU	hsa-miR-410-3p	hsa-miR-410(19)
205	I13	001610	hsa-miR-411		UAGUAGACCGUAUAGCGUACG	hsa-miR-411-5p	hsa-miR-411(17)
206	I14	002297	hsa-miR-422a		ACUGGACUUAGGGUCAGAAGGC	hsa-miR-422a	NA
207	I15	002340	hsa-miR-423-5p		UGAGGGGCAGAGAGCGAGACUUU	hsa-miR-423-5p	NA
208	I16	000604	hsa-miR-424		CAGCAGCAAUUCAUGUUUUGAA	hsa-miR-424-5p	hsa-miR-424(17)
209	I17	001516	hsa-miR-425-5p		AAUGACACGAUCACUCCCGUUGA	hsa-miR-425-5p	hsa-miR-425(17)
210	I18	001024	hsa-miR-429		UAAUACUGUCUGGUAAAACCGU	hsa-miR-429	NA
211	I19	001979	hsa-miR-431		UGUCUUGCAGGCCGUCAUGCA	hsa-miR-431-5p	hsa-miR-431(17)
212	I20	001028	hsa-miR-433		AUCAUGAUGGGCUCCUCGGUGU	hsa-miR-433-3p	hsa-miR-433(19)
213	I21	001030	hsa-miR-449		UGGCAGUGUAUUGUUAGCUGGU	hsa-miR-449a	hsa-miR-449(9.2)
214	I22	001608	hsa-miR-449b		AGGCAGUGUAUUGUUAGCUGGC	hsa-miR-449b-5p	hsa-miR-449b(17)
215	I23	002303	hsa-miR-450a		UUUUGCGAUGUGUUCCUAAUAU	hsa-miR-450a-5p	hsa-miR-450a(17)
216	I24	002208	hsa-miR-450b-3p		UUGGGAUCAUUUUGCAUCCAUA	hsa-miR-450b-3p	NA
217	J1	002207	hsa-miR-450b-5p		UUUUGCAAUAUGUUCCUGAAUA	hsa-miR-450b-5p	NA
218	J2	001141	mmu-miR-451		AAACCGUUACCAUUACUGAGUU	hsa-miR-451a	hsa-miR-451(17)
219	J3	002329	hsa-miR-452		AACUGUUUGCAGAGGAAACUGA	hsa-miR-452-5p	hsa-miR-452(17)
220	J4	002318	hsa-miR-453		AGGUUGUCCGUGGUGAGUUCGCA	hsa-miR-323b-5p	hsa-miR-453(14)
221	J5	002323	hsa-miR-454		UAGUGCAAUAUUGCUUAUAGGGU	hsa-miR-454-3p	hsa-miR-454(17)
222	J6	002244	hsa-miR-455-3p		GCAGUCCAUGGGCAUAUACAC	hsa-miR-455-3p	NA
223	J7	001280	hsa-miR-455		UAUGUGCCUUUGGACUACAUCG	hsa-miR-455-5p	hsa-miR-455(9.2)
224	J8	002338	hsa-miR-483-5p		AAGACGGGAGGAAAGAAGGGAG	hsa-miR-483-5	NA
225	J9	001821	hsa-miR-484		UCAGGCUCAGUCCCCUCCCGAU	hsa-miR-484	NA
226	J10	001277	hsa-miR-485-3p		GUCAUACACGGCUCUCCUCUCU	hsa-miR-485-3p	NA
227	J11	001036	hsa-miR-485-5p		AGAGGCUGGCCGUGAUGAAUUC	hsa-miR-485-5p	NA
228	J12	002093	hsa-miR-486-3p		CGGGGCAGCUCAGUACAGGAU	hsa-miR-486-3p	NA
229	J13	001278	hsa-miR-486		UCCUGUACUGAGCUGCCCCGAG	hsa-miR-486-5p	hsa-miR-486(9.2)
230	J14	001279	hsa-miR-487a		AAUCAUACAGGGACAUCCAGUU	hsa-miR-487a-3p	hsa-miR-487(7.1), hsa-miR-487a(19)
231	J15	001285	hsa-miR-487b		AAUCGUACAGGGUCAUCCACUU	hsa-miR-487b-3p	hsa-miR-487b(19)
232	J16	002357	hsa-miR-488		UUGAAAGGCUAUUUCUUGGUC	hsa-miR-488-3p	hsa-miR-488(17)
233	J17	002358	hsa-miR-489		GUGACAUCACAUAUACGGCAGC	hsa-miR-489-3p	hsa-miR-489(19)
234	J18	001037	hsa-miR-490		CAACCUGGAGGACUCCAUGCUG	hsa-miR-490-3p	hsa-miR-490(9.2)
235	J19	002360	hsa-miR-491-3p		CUUAUGCAAGAUUCCCUUCUAC	hsa-miR-491-3p	NA
236	J20	001630	mmu-miR-491		AGUGGGGAACCCUUCCAUGAGG	hsa-miR-491-5p	NA
237	J21	002364	hsa-miR-493		UGAAGGUCUACUGUGUGCCAGG	hsa-miR-493-3p	hsa-miR-493(17)
238	J22	002365	hsa-miR-494		UGAAACAUACACGGGAAACCUC	hsa-miR-494-3p	hsa-miR-494(19)
239	J23	001663	mmu-miR-495		AAACAAACAUGGUGCACUUCUU	hsa-miR-495-3p	hsa-miR-495(18)
240	J24	001953	mmu-miR-496		UGAGUAUUACAUGGCCAAUCUC	hsa-miR-496	NA
241	K1	002427	hsa-miR-499-3p		AACAUCACAGCAAGUCUGUGCU	hsa-miR-499a-3p	hsa-miR-499-3p(17)
242	K2	001352	mmu-miR-499		UUAAGACUUGCAGUGAUGUUU	hsa-miR-499a-5p	hsa-miR-499-5p(17)
243	K3	002428	hsa-miR-500		UAAUCCUUGCUACCUGGGUGAGA	hsa-miR-500a-5p	hsa-miR-500(15), hsa-miR-500a(17)
244	K4	002435	hsa-miR-501-3p		AAUGCACCCGGGCAAGGAUUCU	hsa-miR-501-3p	NA
245	K5	001047	hsa-miR-501		AAUCCUUUGUCCCUGGGUGAGA	hsa-miR-501-5p	hsa-miR-501(9.2)
246	K6	002083	hsa-miR-502-3p		AAUGCACCUGGGCAAGGAUUCA	hsa-miR-502-3p	NA
247	K7	001109	hsa-miR-502		AUCCUUGCUAUCUGGGUGCUA	hsa-miR-502-5p	hsa-miR-502(9.2)
248	K8	001048	hsa-miR-503		UAGCAGCGGGAACAGUUCUGCAG	hsa-miR-503-5p	hsa-miR-503(18)
249	K9	002084	hsa-miR-504		AGACCCUGGUCUGCACUCUAUC	hsa-miR-504-5p	hsa-miR-504(19)
250	K10	002089	hsa-miR-505		CGUCAACACUUGCUGGUUUCCU	hsa-miR-505-3p	hsa-miR-505(17)
251	K11	001051	hsa-miR-507		UUUUGCACCUUUUGGAGUGAA	hsa-miR-507	NA
252	K12	001052	hsa-miR-508		UGAUUGUAGCCUUUUGGAGUAGA	hsa-miR-508-3	hsa-miR-508(9.2)
253	K13	002092	hsa-miR-508-5p		UACUCCAGAGGGCGUCACUCAUG	hsa-miR-508-5	NA
254	K14	002235	hsa-miR-509-5p		UACUGCAGACAGUGGCAAUCA	hsa-miR-509-5p	NA
255	K15	002241	hsa-miR-510		UACUCAGGAGAGUGGCAAUCAC	hsa-miR-510-5	hsa-miR-510(19)
256	K16	001823	hsa-miR-512-3p		AAGUGCUGUCAUAGCUGAGGUC	hsa-miR-512-3p	NA
257	K17	001145	hsa-miR-512-5p		CACUCAGCCUUGAGGGCACUUUC	hsa-miR-512-5	NA
258	K18	002090	hsa-miR-513-5p		UUCACAGGGAGGUGUCAU	hsa-miR-513a-5p	hsa-miR-513-5p(10)
259	K19	002369	hsa-miR-515-3p		GAGUGCCUUCUUUUGGAGCGUU	hsa-miR-515-3p	NA
260	K20	001112	hsa-miR-515-5p		UUCUCCAAAAGAAAGCACUUUCUG	hsa-miR-515-5p	NA
261	K21	002416	hsa-miR-516a-5p		UUCUCGAGGAAAGAAGCACUUUC	hsa-miR-516a-5p	NA
262	K22	001150	hsa-miR-516b		AUCUGGAGGUAAGAAGCACUUU	hsa-miR-516b-5p	hsa-miR-516-5p(7), hsa-miR-516b(17)
263	K23	002402	hsa-miR-517a		AUCGUGCAUCCCUUUAGAGUGU	hsa-miR-517a-3p	hsa-miR-517a(17)
264	K24	001153	hsa-miR-517c		AUCGUGCAUCCUUUUAGAGUGU	hsa-miR-517c-3p	hsa-miR-517c(17)
265	L1	002397	hsa-miR-518a-3p		GAAAGCGCUUCCCUUUGCUGGA	hsa-miR-518a-3p	NA
266	L2	002396	hsa-miR-518a-5p		CUGCAAAGGGAAGCCCUUUC	hsa-miR-518a-5p	NA
267	L3	001156	hsa-miR-518b		CAAAGCGCUCCCCUUUAGAGGU	hsa-miR-518b	NA
268	L4	002401	hsa-miR-518c		CAAAGCGCUUCUCUUUAGAGUGU	hsa-miR-518c-3p	hsa-miR-518c(17)
269	L5	001159	hsa-miR-518d		CAAAGCGCUUCCCUUUGGAGC	hsa-miR-518d-3p	hsa-miR-518d(9.2)
270	L6	002389	hsa-miR-518d-5p		CUCUAGAGGGAAGCACUUUCUG	hsa-miR-518d-5p	NA
271	L7	002395	hsa-miR-518e		AAAGCGCUUCCCUUCAGAGUG	hsa-miR-518e-3p	hsa-miR-518e(17)
272	L8	002388	hsa-miR-518f		GAAAGCGCUUCUCUUUAGAGG	hsa-miR-518f-3p	hsa-miR-518f(17)
273	L9	002415	hsa-miR-519a		AAAGUGCAUCCUUUUAGAGUGU	hsa-miR-519a-3p	hsa-miR-519a(17)
274	L10	002403	hsa-miR-519d		CAAAGUGCCUCCCUUUAGAGUG	hsa-miR-519d-3p	hsa-miR-519d(19)
275	L11	002370	hsa-miR-519e		AAGUGCCUCCUUUUAGAGUGUU	hsa-miR-519e-3p	hsa-miR-519e(17)
276	L12	001167	hsa-miR-520a		AAAGUGCUUCCCUUUGGACUGU	hsa-miR-520a-3p	hsa-miR-520a(9.2)
277	L13	001168	hsa-miR-520a#		CUCCAGAGGGAAGUACUUUCU	hsa-miR-520a-5p	hsa-miR-520a*(9.2)
278	L14	002393	hsa-miR-520d-5p		CUACAAAGGGAAGCCCUUUC	hsa-miR-520d-5p	NA
279	L15	001121	hsa-miR-520g		ACAAAGUGCUUCCCUUUAGAGUGU	hsa-miR-520g-3p	hsa-miR-520g(19)
280	L16	001122	hsa-miR-521		AACGCACUUCCCUUUAGAGUGU	hsa-miR-521	NA
281	L17	002413	hsa-miR-522		AAAAUGGUUCCCUUUAGAGUGU	hsa-miR-522-3p	hsa-miR-522(17)
282	L18	002386	hsa-miR-523		GAACGCGCUUCCCUAUAGAGGGU	hsa-miR-523-3p	hsa-miR-523(17)
283	L19	001982	hsa-miR-524-5p		CUACAAAGGGAAGCACUUUCUC	hsa-miR-524-5p	hsa-miR-524*(9.2)
284	L20	002385	hsa-miR-525-3p		GAAGGCGCUUCCCUUUAGAGCG	hsa-miR-525-3p	NA
285	L21	001174	hsa-miR-525		CUCCAGAGGGAUGCACUUUCU	hsa-miR-525-5p	hsa-miR-525(9.2)
286	L22	002382	hsa-miR-526b		CUCUUGAGGGAAGCACUUUCUGU	hsa-miR-526b-5p	hsa-miR-526b(17)
287	L23	002355	hsa-miR-532-3p		CCUCCCACACCCAAGGCUUGCA	hsa-miR-532-3p	NA
288	L24	001518	hsa-miR-532		CAUGCCUUGAGUGUAGGACCGU	hsa-miR-532-5p	hsa-miR-532(9.2)
289	M1	001286	hsa-miR-539		GGAGAAAUUAUCCUUGGUGUGU	hsa-miR-539-5p	hsa-miR-539(17)
290	M2	002201	hsa-miR-541		UGGUGGGCACAGAAUCUGGACU	hsa-miR-541-3	hsa-miR-541(17)
291	M3	001284	hsa-miR-542-3p		UGUGACAGAUUGAUAACUGAAA	hsa-miR-542-3p	NA
292	M4	002240	hsa-miR-542-5p		UCGGGGAUCAUCAUGUCACGAGA	hsa-miR-542-5p	NA
293	M5	002265	hsa-miR-544		AUUCUGCAUUUUUAGCAAGUUC	hsa-miR-544a	hsa-miR-544(17)
294	M6	002267	hsa-miR-545		UCAGCAAACAUUUAUUGUGUGC	hsa-miR-545-3p	hsa-miR-545(17)
295	M7	001538	hsa-miR-548a		CAAAACUGGCAAUUACUUUUGC	hsa-miR-548a-3p	hsa-miR-548a(9.2)
296	M8	002412	hsa-miR-548a-5p		AAAAGUAAUUGCGAGUUUUACC	hsa-miR-548a-5	NA
297	M9	001541	hsa-miR-548b		CAAGAACCUCAGUUGCUUUUGU	hsa-miR-548b-3p	hsa-miR-548b(9.2)
298	M10	002408	hsa-miR-548b-5p		AAAAGUAAUUGUGGUUUUGGCC	hsa-miR-548b-5	NA
299	M11	001590	hsa-miR-548c		CAAAAAUCUCAAUUACUUUUGC	hsa-miR-548c-3p	hsa-miR-548c(9.2)
300	M12	002429	hsa-miR-548c-5p		AAAAGUAAUUGCGGUUUUUGCC	hsa-miR-548am-5p	NA
301	M13	001605	hsa-miR-548d		CAAAAACCACAGUUUCUUUUGC	hsa-miR-548d-3	hsa-miR-548d(9.2)
302	M14	002237	hsa-miR-548d-5p		AAAAGUAAUUGUGGUUUUUGCC	hsa-miR-548d-5	NA
303	M15	001535	hsa-miR-551b		GCGACCCAUACUUGGUUUCAG	hsa-miR-551b-3p	hsa-miR-551b(17)
304	M16	002345	hsa-miR-556-3p		AUAUUACCAUUAGCUCAUCUUU	hsa-miR-556-3p	NA
305	M17	002344	hsa-miR-556-5p		GAUGAGCUCAUUGUAAUAUGAG	hsa-miR-556-5p	NA
306	M18	001528	hsa-miR-561		CAAAGUUUAAGAUCCUUGAAGU	hsa-miR-561-3	hsa-miR-561(17)
307	M19	002347	hsa-miR-570		CGAAAACAGCAAUUACCUUUGC	hsa-miR-570-3	hsa-miR-570(17)
308	M20	002349	hsa-miR-574-3p		CACGCUCAUGCACACACCCACA	hsa-miR-574-3p	NA
309	M21	002351	hsa-miR-576-3p		AAGAUGUGGAAAAAUUGGAAUC	hsa-miR-576-3p	NA
310	M22	002350	hsa-miR-576-5p		AUUCUAAUUUCUCCACGUCUUU	hsa-miR-576-5	NA
311	M23	002398	hsa-miR-579		UUCAUUUGGUAUAAACCGCGAUU	hsa-miR-579-3p	hsa-miR-579(19)
312	M24	002399	hsa-miR-582-3p		UAACUGGUUGAACAACUGAACC	hsa-miR-582-3p	NA
313	N1	001983	hsa-miR-582-5p		UUACAGUUGUUCAACCAGUUACU	hsa-miR-582-5p	hsa-miR-582(9.2)
314	N2	002409	hsa-miR-589		UGAGAACCACGUCUGCUCUGAG	hsa-miR-589-5p	hsa-miR-589(17)
315	N3	001984	hsa-miR-590-5p		GAGCUUAUUCAUAAAAGUGCAG	hsa-miR-590-5p	hsa-miR-590(9.2)
316	N4	001551	hsa-miR-597		UGUGUCACUCGAUGACCACUGU	hsa-miR-597-5p	hsa-miR-597(19)
317	N5	001988	hsa-miR-598		UACGUCAUCGUUGUCAUCGUCA	hsa-miR-598-3p	hsa-miR-598(19)
318	N6	001960	mmu-miR-615		UCCGAGCCUGGGUCUCCCUCUU	hsa-miR-615-3p	NA
319	N7	002353	hsa-miR-615-5p		GGGGGUCCCCGGUGCUCGGAUC	hsa-miR-615-5p	NA
320	N8	002414	hsa-miR-616		AGUCAUUGGAGGGUUUGAGCAG	hsa-miR-616-3p	hsa-miR-616(17)
321	N9	001593	hsa-miR-618		AAACUCUACUUGUCCUUCUGAGU	hsa-miR-618	NA
322	N10	002430	hsa-miR-624		CACAAGGUAUUGGUAUUACCU	hsa-miR-624-3p	hsa-miR-624(17)
323	N11	002431	hsa-miR-625		AGGGGGAAAGUUCUAUAGUCC	hsa-miR-625-5	hsa-miR-625(17)
324	N12	001560	hsa-miR-627		GUGAGUCUCUAAGAAAAGAGGA	hsa-miR-627-5p	hsa-miR-627(19)
325	N13	002433	hsa-miR-628-5p		AUGCUGACAUAUUUACUAGAGG	hsa-miR-628-5p	NA
326	N14	002436	hsa-miR-629		UGGGUUUACGUUGGGAGAACU	hsa-miR-629-5	hsa-miR-629(17)
327	N15	002088	hsa-miR-636		UGUGCUUGCUCGUCCCGCCCGCA	hsa-miR-63	NA
328	N16	001592	hsa-miR-642		GUCCCUCUCCAAAUGUGUCUUG	hsa-miR-642a-5p	hsa-miR-642(15), hsa-miR-642a(17)
329	N17	001604	hsa-miR-651		UUUAGGAUAAGCUUGACUUUUG	hsa-miR-651-5	hsa-miR-651(19)
330	N18	002352	hsa-miR-652		AAUGGCGCCACUAGGGUUGUG	hsa-miR-652-3p	hsa-miR-652(17)
331	N19	002292	hsa-miR-653		GUGUUGAAACAAUCUCUACUG	hsa-miR-653-5p	hsa-miR-653(19)
332	N20	002239	hsa-miR-654-3p		UAUGUCUGCUGACCAUCACCUU	hsa-miR-654-3p	NA
333	N21	001611	hsa-miR-654		UGGUGGGCCGCAGAACAUGUGC	hsa-miR-654-5p	hsa-miR-654(9.2)
334	N22	001612	hsa-miR-655		AUAAUACAUGGUUAACCUCUUU	hsa-miR-655-3p	hsa-miR-655(19)
335	N23	001515	hsa-miR-660		UACCCAUUGCAUAUCGGAGUUG	hsa-miR-660-5p	hsa-miR-660(17)
336	N24	002322	hsa-miR-671-3p		UCCGGUUCUCAGGGCUCCACC	hsa-miR-671-3p	NA
337	O1	002327	hsa-miR-672		UGAGGUUGGUGUACUGUGUGUGA	NA	hsa-miR-672(10)
338	O2	002021	hsa-miR-674		GCACUGAGAUGGGAGUGGUGUA	NA	hsa-miR-674(10)
339	O3	002341	hsa-miR-708		AAGGAGCUUACAAUCUAGCUGGG	hsa-miR-708-5p	hsa-miR-708(17)
340	O4	002324	hsa-miR-744		UGCGGGGCUAGGGCUAACAGCA	hsa-miR-744-5p	hsa-miR-744(17)
341	O5	001990	hsa-miR-758		UUUGUGACCUGGUCCACUAACC	hsa-miR-758-3p	hsa-miR-758(18)
342	O6	002354	hsa-miR-871		UAUUCAGAUUAGUGCCAGUCAUG	NA	hsa-miR-871(10)
343	O7	002264	hsa-miR-872		AAGGUUACUUGUUAGUUCAGG	NA	hsa-miR-872(10)
344	O8	002356	hsa-miR-873		GCAGGAACUUGUGAGUCUCCU	hsa-miR-873-5p	hsa-miR-873(17)
345	O9	002268	hsa-miR-874		CUGCCCUGGCCCGAGGGACCGA	hsa-miR-874-3p	hsa-miR-874(19)
346	O10	002204	hsa-miR-875-3p		CCUGGAAACACUGAGGUUGUG	hsa-miR-875-3	NA
347	O11	002225	hsa-miR-876-3p		UGGUGGUUUACAAAGUAAUUCA	hsa-miR-876-3p	NA
348	O12	002205	hsa-miR-876-5p		UGGAUUUCUUUGUGAAUCACCA	hsa-miR-876-5p	NA
349	O13	002372	hsa-miR-885-3p		AGGCAGCGGGGUGUAGUGGAUA	hsa-miR-885-3p	NA
350	O14	002296	hsa-miR-885-5p		UCCAUUACACUACCCUGCCUCU	hsa-miR-885-5p	NA
351	O15	002194	hsa-miR-886-3p		CGCGGGUGCUUACUGACCCUU	NA	hsa-miR-886-3p(15)
352	O16	002193	hsa-miR-886-5p		CGGGUCGGAGUUAGCUCAAGCGG	NA	hsa-miR-886-5p(15)
353	O17	002374	hsa-miR-887		GUGAACGGGCGCCAUCCCGAGG	hsa-miR-887-3p	hsa-miR-887(19)
354	O18	002212	hsa-miR-888		UACUCAAAAAGCUGUCAGUCA	hsa-miR-888-5p	hsa-miR-888(17)
355	O19	002202	hsa-miR-889		UUAAUAUCGGACAACCAUUGU	hsa-miR-889-3p	hsa-miR-889(19)
356	O20	002209	hsa-miR-890		UACUUGGAAAGGCAUCAGUUG	hsa-miR-890	NA
357	O21	002191	hsa-miR-891a		UGCAACGAACCUGAGCCACUGA	hsa-miR-891a-5	hsa-miR-891a(19)
358	O22	002210	hsa-miR-891b		UGCAACUUACCUGAGUCAUUGA	hsa-miR-891b	NA
359	O23	002195	hsa-miR-892a		CACUGUGUCCUUUCUGCGUAG	hsa-miR-892a	NA
360	O24	000469	hsa-miR-147		GUGUGUGGAAAUGCUUCUGC	hsa-miR-147a	hsa-miR-147(17)
361	P1	000511	hsa-miR-208		AUAAGACGAGCAAAAAGCUUGU	hsa-miR-208a-3p	hsa-miR-208(10), hsa-miR-208a(19)
362	P2	000514	hsa-miR-211		UUCCCUUUGUCAUCCUUCGCCU	hsa-miR-211-5p	hsa-miR-211(17)
363	P3	000515	hsa-miR-212		UAACAGUCUCCAGUCACGGCC	hsa-miR-212-3p	hsa-miR-212(17)
364	P4	002095	hsa-miR-219-1-3p		AGAGUUGAGUCUGGACGUCCCG	hsa-miR-219a-1-3p	hsa-miR-219-1-3p(19)
365	P5	002390	hsa-miR-219-2-3p		AGAAUUGUGGCUGGACAUCUGU	hsa-miR-219a-2-3p	hsa-miR-219-2-3p(19)
366	P6	000523	hsa-miR-220		CCACACCGUAUCUGACACUUU	NA	hsa-miR-220(10), hsa-miR-220a(15)
367	P7	002206	hsa-miR-220b		CCACCACCGUGUCUGACACUU	NA	hsa-miR-220b(15)
368	P8	002211	hsa-miR-220c		ACACAGGGCUGUUGUGAAGACU	NA	hsa-miR-220c(15)
369	P9	002190	hsa-miR-298		AGCAGAAGCAGGGAGGUUCUCCCA	hsa-miR-298	NA
370	P10	000540	hsa-miR-325		CCUAGUAGGUGUCCAGUAAGUGU	hsa-miR-325	NA
371	P11	000553	hsa-miR-346		UGUCUGCCCGCAUGCCUGCCUCU	hsa-miR-346	NA
372	P12	002122	hsa-miR-376c		AACAUAGAGGAAAUUCCACGU	hsa-miR-376c-3p	hsa-miR-376c(18)
373	P13	000574	hsa-miR-384		AUUCCUAGAAAUUGUUCAUA	hsa-miR-384	NA
374	P14	001023	hsa-miR-412		ACUUCACCUGGUCCACUAGCCGU	hsa-miR-412-3p	hsa-miR-412(19)
375	P15	001029	hsa-miR-448		UUGCAUAUGUAGGAUGUCCCAU	hsa-miR-448	NA
376	P16	001039	hsa-miR-492		AGGACCUGCGGGACAAGAUUCUU	hsa-miR-492	NA
377	P17	001050	hsa-miR-506		UAAGGCACCCUUCUGAGUAGA	hsa-miR-506-3p	hsa-miR-506(17)
378	P18	002155	hsa-miR-509-3-5p		UACUGCAGACGUGGCAAUCAUG	hsa-miR-509-3-5	NA
379	P19	001111	hsa-miR-511		GUGUCUUUUGCUCUGCAGUCA	hsa-miR-511-5p	hsa-miR-511(19)
380	P20	001152	hsa-miR-517b		UCGUGCAUCCCUUUAGAGUGUU	NA	hsa-miR-517b(17)
381	P21	001163	hsa-miR-519c		AAAGUGCAUCUUUUUAGAGGAU	hsa-miR-519c-3p	hsa-miR-519c(9.2)
382	P22	001116	hsa-miR-520b		AAAGUGCUUCCUUUUAGAGGG	hsa-miR-520b	NA
383	P23	001119	hsa-miR-520e		AAAGUGCUUCCUUUUUGAGGG	hsa-miR-520e	NA
384	P24	001120	hsa-miR-520f		AAGUGCUUCCUUUUAGAGGGUU	hsa-miR-520f-3p	hsa-miR-520f(19)

## Sheet: Human B
Well Number	Well Name	Assay ID	Assay Name	Control Assay	Assay Target Sequence	miRBase ID (v22) or NCBI Name (for Controls)	miRBase Alias
1	A1	000268	dme-miR-7		UGGAAGACUAGUGAUUUUGUUGU	hsa-miR-7-5p	hsa-miR-7(17)
2	A2	002909	hsa-miR-548I		AAAAGUAAUUGCGGAUUUUGCC	hsa-miR-548i	NA
3	A3	000416	hsa-miR-30a-3p		CUUUCAGUCGGAUGUUUGCAGC	hsa-miR-30a-3p	hsa-miR-30a(3.1), hsa-miR-30a*(17)
4	A4	000417	hsa-miR-30a-5p		UGUAAACAUCCUCGACUGGAAG	hsa-miR-30a-5p	hsa-miR-30a(17)
5	A5	000420	hsa-miR-30d		UGUAAACAUCCCCGACUGGAAG	hsa-miR-30d-5p	hsa-miR-30d(17)
6	A6	000422	hsa-miR-30e-3p		CUUUCAGUCGGAUGUUUACAGC	hsa-miR-30e-3p	hsa-miR-30e*(17)
7	A7	000427	hsa-miR-34b		UAGGCAGUGUCAUUAGCUGAUUG	hsa-miR-34b-5p	hsa-miR-34b(9.2), hsa-miR-34b*(17)
8	A8	000451	hsa-miR-126#		CAUUAUUACUUUUGGUACGCG	hsa-miR-126-5p	hsa-miR-126*(17)
9	A9	000478	hsa-miR-154#		AAUCAUACACGGUUGACCUAUU	hsa-miR-154-3p	hsa-miR-154*(17)
10	A10	000483	hsa-miR-182#		UGGUUCUAGACUUGCCAACUA	hsa-miR-182-3p	hsa-miR-182*(17)
11	A11	001973	U6 snRNA	+	GUGCUCGCUUCGGCAGCACAUAUACUAAAAUUGGAACGAUACAGAGAAGAUUAGCAUGGCCCCUGCGCAAGGAUGACACGCAAAUUCGUGAAGCGUUCCAUAUUUU	U6 snRNA	NA
12	A12	001973	U6 snRNA	+	GUGCUCGCUUCGGCAGCACAUAUACUAAAAUUGGAACGAUACAGAGAAGAUUAGCAUGGCCCCUGCGCAAGGAUGACACGCAAAUUCGUGAAGCGUUCCAUAUUUU	U6 snRNA	NA
13	A13	000510	hsa-miR-206		UGGAAUGUAAGGAAGUGUGUGG	hsa-miR-206	NA
14	A14	000516	hsa-miR-213		ACCAUCGACCGUUGAUUGUACC	hsa-miR-181a-3p	hsa-miR-181a*(17), hsa-miR-213(8)
15	A15	000534	hsa-miR-302c#		UUUAACAUGGGGGUACCUGCUG	hsa-miR-302c-5p	hsa-miR-302c*(17)
16	A16	000535	hsa-miR-302d		UAAGUGCUUCCAUGUUUGAGUGU	hsa-miR-302d-3p	hsa-miR-302d(17)
17	A17	000567	hsa-miR-378		CUCCUGACUCCAGGUCCUGUGU	hsa-miR-378a-5p	hsa-miR-378(9.2), hsa-miR-378*(17)
18	A18	000570	hsa-miR-380-5p		UGGUUGACCAUAGAACAUGCGC	hsa-miR-380-5p	hsa-miR-380*(17)
19	A19	002910	hsa-miR-1257		AGUGAAUGAUGGGUUCUGACC	hsa-miR-1257	NA
20	A20	001011	hsa-miR-200a#		CAUCUUACCGGACAGUGCUGGA	hsa-miR-200a-5p	hsa-miR-200a*(17)
21	A21	001026	hsa-miR-432		UCUUGGAGUAGGUCAUUGGGUGG	hsa-miR-432-5p	hsa-miR-432(17)
22	A22	001027	hsa-miR-432#		CUGGAUGGCUCCUCCAUGUCU	hsa-miR-432-3p	hsa-miR-432*(17)
23	A23	001043	hsa-miR-497		CAGCAGCACACUGUGGUUUGU	hsa-miR-497-5p	hsa-miR-497(17)
24	A24	001046	hsa-miR-500		AUGCACCUGGGCAAGGAUUCUG	hsa-miR-500a-3p	hsa-miR-500(9.2), hsa-miR-500*(15), hsa-miR-500a*(17)
25	B1	002927	hsa-miR-1238		CUUCCUCGUCUGUCUGCCCC	hsa-miR-1238-3p	hsa-miR-1238(18)
26	B2	001106	hsa-miR-488		CCCAGAUAAUGGCACUCUCAA	hsa-miR-488-5p	hsa-miR-488(9.2), hsa-miR-488*(17)
27	B3	001113	hsa-miR-517#		CCUCUAGAUGGAAGCACUGUCU	hsa-miR-517-5p	hsa-miR-517*(17)
28	B4	001149	hsa-miR-516-3p		UGCUUCCUUUCAGAGGGU	hsa-miR-516a-3p	hsa-miR-516-3p(9.2), hsa-miR-516b*(17)
29	B5	001158	hsa-miR-518c#		UCUCUGGAGGGAAGCACUUUCUG	hsa-miR-518c-5p	hsa-miR-518c*(17)
30	B6	001166	hsa-miR-519e#		UUCUCCAAAAGGGAGCACUUUC	hsa-miR-519e-5p	hsa-miR-519e*(17)
31	B7	001170	hsa-miR-520h		ACAAAGUGCUUCCCUUUAGAGU	hsa-miR-520h	NA
32	B8	001173	hsa-miR-524		GAAGGCGCUUCCCUUUGGAGU	hsa-miR-524-3p	hsa-miR-524(9.2)
33	B9	001178	mmu-let-7d#		CUAUACGACCUGCUGCCUUUCU	hsa-let-7d-3p	hsa-let-7d*(17)
34	B10	001283	hsa-miR-363#		CGGGUGGAUCACGAUGCAAUUU	hsa-miR-363-5p	hsa-miR-363*(17)
35	B11	001973	U6 snRNA	+	GUGCUCGCUUCGGCAGCACAUAUACUAAAAUUGGAACGAUACAGAGAAGAUUAGCAUGGCCCCUGCGCAAGGAUGACACGCAAAUUCGUGAAGCGUUCCAUAUUUU	U6 snRNA	NA
36	B12	001973	U6 snRNA	+	GUGCUCGCUUCGGCAGCACAUAUACUAAAAUUGGAACGAUACAGAGAAGAUUAGCAUGGCCCCUGCGCAAGGAUGACACGCAAAUUCGUGAAGCGUUCCAUAUUUU	U6 snRNA	NA
37	B13	001338	rno-miR-7#		CAACAAAUCACAGUCUGCCAUA	hsa-miR-7-1-3p	hsa-miR-7-1*(17)
38	B14	001510	hsa-miR-656		AAUAUUAUACAGUCAACCUCU	hsa-miR-656-3p	hsa-miR-656(19)
39	B15	001511	hsa-miR-549		UGACAACUAUGGAUGAGCUCU	hsa-miR-549a	hsa-miR-549(18)
40	B16	001512	hsa-miR-657		GGCAGGUUCUCACCCUCUCUAGG	hsa-miR-657	NA
41	B17	001513	hsa-miR-658		GGCGGAGGGAAGUAGGUCCGUUGGU	hsa-miR-658	NA
42	B18	001514	hsa-miR-659		CUUGGUUCAGGGAGGGUCCCCA	hsa-miR-659-3p	hsa-miR-659(17)
43	B19	001519	hsa-miR-551a		GCGACCCACUCUUGGUUUCCA	hsa-miR-551a	NA
44	B20	001520	hsa-miR-552		AACAGGUGACUGGUUAGACAA	hsa-miR-552-3p	hsa-miR-552(19)
45	B21	001521	hsa-miR-553		AAAACGGUGAGAUUUUGUUUU	hsa-miR-553	NA
46	B22	001522	hsa-miR-554		GCUAGUCCUGACUCAGCCAGU	hsa-miR-554	NA
47	B23	001523	hsa-miR-555		AGGGUAAGCUGAACCUCUGAU	hsa-miR-555	NA
48	B24	001525	hsa-miR-557		GUUUGCACGGGUGGGCCUUGUCU	hsa-miR-557	NA
49	C1	001526	hsa-miR-558		UGAGCUGCUGUACCAAAAU	hsa-miR-558	NA
50	C2	001527	hsa-miR-559		UAAAGUAAAUAUGCACCAAAA	hsa-miR-559	NA
51	C3	001529	hsa-miR-562		AAAGUAGCUGUACCAUUUGC	hsa-miR-562	NA
52	C4	001530	hsa-miR-563		AGGUUGACAUACGUUUCCC	hsa-miR-563	NA
53	C5	001531	hsa-miR-564		AGGCACGGUGUCAGCAGGC	hsa-miR-564	NA
54	C6	001533	hsa-miR-566		GGGCGCCUGUGAUCCCAAC	hsa-miR-566	NA
55	C7	001534	hsa-miR-567		AGUAUGUUCUUCCAGGACAGAAC	hsa-miR-567	NA
56	C8	001536	hsa-miR-569		AGUUAAUGAAUCCUGGAAAGU	hsa-miR-569	NA
57	C9	001539	hsa-miR-586		UAUGCAUUGUAUUUUUAGGUCC	hsa-miR-586	NA
58	C10	001540	hsa-miR-587		UUUCCAUAGGUGAUGAGUCAC	hsa-miR-587	NA
59	C11	001094	RNU44	+	CCUGGAUGAUGAUAGCAAAUGCUGACUGAACAUGAAGGUCUUAAUUAGCUCUAACUGACU	RNU44	NA
60	C12	001542	hsa-miR-588		UUGGCCACAAUGGGUUAGAAC	hsa-miR-588	NA
61	C13	001543	hsa-miR-589		UCAGAACAAAUGCCGGUUCCCAGA	hsa-miR-589-3p	hsa-miR-589(9.2), hsa-miR-589*(17)
62	C14	001544	hsa-miR-550		UGUCUUACUCCCUCAGGCACAU	hsa-miR-550a-3p	hsa-miR-550(9.2), hsa-miR-550*(15), hsa-miR-550a*(17)
63	C15	001545	hsa-miR-591		AGACCAUGGGUUCUCAUUGU	hsa-miR-591	NA
64	C16	001546	hsa-miR-592		UUGUGUCAAUAUGCGAUGAUGU	hsa-miR-592	NA
65	C17	001547	hsa-miR-593		AGGCACCAGCCAGGCAUUGCUCAGC	hsa-miR-593-5p	hsa-miR-593(9.2), hsa-miR-593*(17)
66	C18	001550	hsa-miR-596		AAGCCUGCCCGGCUCCUCGGG	hsa-miR-596	NA
67	C19	001553	hsa-miR-622		ACAGUCUGCUGAGGUUGGAGC	hsa-miR-622	NA
68	C20	001554	hsa-miR-599		GUUGUGUCAGUUUAUCAAAC	hsa-miR-599	NA
69	C21	001555	hsa-miR-623		AUCCCUUGCAGGGGCUGUUGGGU	hsa-miR-623	NA
70	C22	001556	hsa-miR-600		ACUUACAGACAAGAGCCUUGCUC	hsa-miR-600	NA
71	C23	001557	hsa-miR-624		UAGUACCAGUACCUUGUGUUCA	hsa-miR-624-5p	hsa-miR-624(9.2), hsa-miR-624*(17)
72	C24	001558	hsa-miR-601		UGGUCUAGGAUUGUUGGAGGAG	hsa-miR-601	NA
73	D1	001559	hsa-miR-626		AGCUGUCUGAAAAUGUCUU	hsa-miR-626	NA
74	D2	001562	hsa-miR-629		GUUCUCCCAACGUAAGCCCAGC	hsa-miR-629-3p	hsa-miR-629(9.2), hsa-miR-629*(17)
75	D3	001563	hsa-miR-630		AGUAUUCUGUACCAGGGAAGGU	hsa-miR-630	NA
76	D4	001564	hsa-miR-631		AGACCUGGCCCAGACCUCAGC	hsa-miR-631	NA
77	D5	001566	hsa-miR-603		CACACACUGCAAUUACUUUUGC	hsa-miR-603	NA
78	D6	001567	hsa-miR-604		AGGCUGCGGAAUUCAGGAC	hsa-miR-604	NA
79	D7	001568	hsa-miR-605		UAAAUCCCAUGGUGCCUUCUCCU	hsa-miR-605-5p	hsa-miR-605(19)
80	D8	001569	hsa-miR-606		AAACUACUGAAAAUCAAAGAU	hsa-miR-606	NA
81	D9	001570	hsa-miR-607		GUUCAAAUCCAGAUCUAUAAC	hsa-miR-607	NA
82	D10	001571	hsa-miR-608		AGGGGUGGUGUUGGGACAGCUCCGU	hsa-miR-608	NA
83	D11	001573	hsa-miR-609		AGGGUGUUUCUCUCAUCUCU	hsa-miR-609	NA
84	D12	001574	hsa-miR-633		CUAAUAGUAUCUACCACAAUAAA	hsa-miR-633	NA
85	D13	001576	hsa-miR-634		AACCAGCACCCCAACUUUGGAC	hsa-miR-634	NA
86	D14	001578	hsa-miR-635		ACUUGGGCACUGAAACAAUGUCC	hsa-miR-635	NA
87	D15	001581	hsa-miR-637		ACUGGGGGCUUUCGGGCUCUGCGU	hsa-miR-637	NA
88	D16	001582	hsa-miR-638		AGGGAUCGCGGGCGGGUGGCGGCCU	hsa-miR-638	NA
89	D17	001583	hsa-miR-639		AUCGCUGCGGUUGCGAGCGCUGU	hsa-miR-639	NA
90	D18	001584	hsa-miR-640		AUGAUCCAGGAACCUGCCUCU	hsa-miR-640	NA
91	D19	001585	hsa-miR-641		AAAGACAUAGGAUAGAGUCACCUC	hsa-miR-641	NA
92	D20	001586	hsa-miR-613		AGGAAUGUUCCUUCUUUGCC	hsa-miR-613	NA
93	D21	001587	hsa-miR-614		GAACGCCUGUUCUUGCCAGGUGG	hsa-miR-614	NA
94	D22	001589	hsa-miR-616		ACUCAAAACCCUUCAGUGACUU	hsa-miR-616-5p	hsa-miR-616(9.2), hsa-miR-616*(17)
95	D23	001591	hsa-miR-617		AGACUUCCCAUUUGAAGGUGGC	hsa-miR-617	NA
96	D24	001594	hsa-miR-643		ACUUGUAUGCUAGCUCAGGUAG	hsa-miR-643	NA
97	E1	001596	hsa-miR-644		AGUGUGGCUUUCUUAGAGC	hsa-miR-644a	hsa-miR-644(17)
98	E2	001597	hsa-miR-645		UCUAGGCUGGUACUGCUGA	hsa-miR-645	NA
99	E3	001598	hsa-miR-621		GGCUAGCAACAGCGCUUACCU	hsa-miR-621	NA
100	E4	001599	hsa-miR-646		AAGCAGCUGCCUCUGAGGC	hsa-miR-646	NA
101	E5	001600	hsa-miR-647		GUGGCUGCACUCACUUCCUUC	hsa-miR-647	NA
102	E6	001601	hsa-miR-648		AAGUGUGCAGGGCACUGGU	hsa-miR-648	NA
103	E7	001602	hsa-miR-649		AAACCUGUGUUGUUCAAGAGUC	hsa-miR-649	NA
104	E8	001603	hsa-miR-650		AGGAGGCAGCGCUCUCAGGAC	hsa-miR-650	NA
105	E9	001606	hsa-miR-661		UGCCUGGGUCUCUGGCCUGCGCGU	hsa-miR-661	NA
106	E10	001607	hsa-miR-662		UCCCACGUUGUGGCCCAGCAG	hsa-miR-662	NA
107	E11	001006	RNU48	+	GAUGACCCCAGGUAACUCUGAGUGUGUCGCUGAUGCCAUCACCGCAGCGCUCUGACC	RNU48	NA
108	E12	001613	hsa-miR-571		UGAGUUGGCCAUCUGAGUGAG	hsa-miR-571	NA
109	E13	001614	hsa-miR-572		GUCCGCUCGGCGGUGGCCCA	hsa-miR-572	NA
110	E14	001615	hsa-miR-573		CUGAAGUGAUGUGUAACUGAUCAG	hsa-miR-573	NA
111	E15	001617	hsa-miR-575		GAGCCAGUUGGACAGGAGC	hsa-miR-575	NA
112	E16	001619	hsa-miR-578		CUUCUUGUGCUCUAGGAUUGU	hsa-miR-578	NA
113	E17	001621	hsa-miR-580		UUGAGAAUGAUGAAUCAUUAGG	hsa-miR-580-3p	hsa-miR-580(19)
114	E18	001622	hsa-miR-581		UCUUGUGUUCUCUAGAUCAGU	hsa-miR-581	NA
115	E19	001623	hsa-miR-583		CAAAGAGGAAGGUCCCAUUAC	hsa-miR-583	NA
116	E20	001624	hsa-miR-584		UUAUGGUUUGCCUGGGACUGAG	hsa-miR-584-5p	hsa-miR-584(17)
117	E21	001625	hsa-miR-585		UGGGCGUAUCUGUAUGCUA	hsa-miR-585-3p	hsa-miR-585(19)
118	E22	001818	rno-miR-29c#		UGACCGAUUUCUCCUGGUGUUC	hsa-miR-29c-5p	hsa-miR-29c*(17)
119	E23	001986	hsa-miR-766		ACUCCAGCCCCACAGCCUCAGC	hsa-miR-766-3p	hsa-miR-766(17)
120	E24	001987	hsa-miR-595		GAAGUGUGCCGUGGUGUGUCU	hsa-miR-595	NA
121	F1	001992	hsa-miR-668		UGUCACUCGGCUCGGCCCACUAC	hsa-miR-668-3p	hsa-miR-668(19)
122	F2	001993	hsa-miR-767-5p		UGCACCAUGGUUGUCUGAGCAUG	hsa-miR-767-5p	NA
123	F3	001995	hsa-miR-767-3p		UCUGCUCAUACCCCAUGGUUUCU	hsa-miR-767-3p	NA
124	F4	001996	hsa-miR-454#		ACCCUAUCAAUAUUGUCUCUGC	hsa-miR-454-5p	hsa-miR-454*(17)
125	F5	001998	hsa-miR-769-5p		UGAGACCUCUGGGUUCUGAGCU	hsa-miR-769-5p	NA
126	F6	002002	hsa-miR-770-5p		UCCAGUACCACGUGUCAGGGCCA	hsa-miR-770-5p	NA
127	F7	002003	hsa-miR-769-3p		CUGGGAUCUCCGGGGUCUUGGUU	hsa-miR-769-3p	NA
128	F8	002004	hsa-miR-802		CAGUAACAAAGAUUCAUCCUUGU	hsa-miR-802	NA
129	F9	002005	hsa-miR-675		UGGUGCGGAGAGGGCCCACAGUG	hsa-miR-675-5p	hsa-miR-675(17)
130	F10	002087	hsa-miR-505#		GGGAGCCAGGAAGUAUUGAUGU	hsa-miR-505-5p	hsa-miR-505*(17)
131	F11	002094	hsa-miR-218-1#		AUGGUUCCGUCAAGCACCAUGG	hsa-miR-218-1-3p	hsa-miR-218-1*(17)
132	F12	002096	hsa-miR-221#		ACCUGGCAUACAAUGUAGAUUU	hsa-miR-221-5p	hsa-miR-221*(17)
133	F13	002097	hsa-miR-222#		CUCAGUAGCCAGUGUAGAUCCU	hsa-miR-222-5p	hsa-miR-222*(17)
134	F14	002098	hsa-miR-223#		CGUGUAUUUGACAAGCUGAGUU	hsa-miR-223-5p	hsa-miR-223*(17)
135	F15	002100	hsa-miR-136#		CAUCAUCGUCUCAAAUGAGUCU	hsa-miR-136-3p	hsa-miR-136*(17)
136	F16	002102	hsa-miR-34b		CAAUCACUAACUCCACUGCCAU	hsa-miR-34b-3p	hsa-miR-34b(17)
137	F17	002104	hsa-miR-185#		AGGGGCUGGCUUUCCUCUGGUC	hsa-miR-185-3p	hsa-miR-185*(17)
138	F18	002105	hsa-miR-186#		GCCCAAAGGUGAAUUUUUUGGG	hsa-miR-186-3p	hsa-miR-186*(17)
139	F19	002107	hsa-miR-195#		CCAAUAUUGGCUGUGCUGCUCC	hsa-miR-195-3p	hsa-miR-195*(17)
140	F20	002108	hsa-miR-30c-1#		CUGGGAGAGGGUUGUUUACUCC	hsa-miR-30c-1-3p	hsa-miR-30c-1*(17)
141	F21	002110	hsa-miR-30c-2#		CUGGGAGAAGGCUGUUUACUCU	hsa-miR-30c-2-3p	hsa-miR-30c-2*(17)
142	F22	002111	hsa-miR-32#		CAAUUUAGUGUGUGUGAUAUUU	hsa-miR-32-3p	hsa-miR-32*(17)
143	F23	002113	hsa-miR-31#		UGCUAUGCCAACAUAUUGCCAU	hsa-miR-31-3p	hsa-miR-31*(17)
144	F24	002114	hsa-miR-130b#		ACUCUUUCCCUGUUGCACUAC	hsa-miR-130b-5p	hsa-miR-130b*(17)
145	G1	002115	hsa-miR-26a-2#		CCUAUUCUUGAUUACUUGUUUC	hsa-miR-26a-2-3p	hsa-miR-26a-2*(17)
146	G2	002116	hsa-miR-361-3p		UCCCCCAGGUGUGAUUCUGAUUU	hsa-miR-361-3p	NA
147	G3	002118	hsa-let-7g#		CUGUACAGGCCACUGCCUUGC	hsa-let-7g-3p	hsa-let-7g*(17)
148	G4	002119	hsa-miR-302b#		ACUUUAACAUGGAAGUGCUUUC	hsa-miR-302b-5p	hsa-miR-302b*(17)
149	G5	002120	hsa-miR-302d#		ACUUUAACAUGGAGGCACUUGC	hsa-miR-302d-5p	hsa-miR-302d*(17)
150	G6	002121	hsa-miR-367#		ACUGUUGCUAAUAUGCAACUCU	hsa-miR-367-5p	hsa-miR-367*(17)
151	G7	002125	hsa-miR-374a#		CUUAUCAGAUUGUAUUGUAAUU	hsa-miR-374a-3p	hsa-miR-374a*(17)
152	G8	002126	hsa-miR-23b#		UGGGUUCCUGGCAUGCUGAUUU	hsa-miR-23b-5p	hsa-miR-23b*(17)
153	G9	002127	hsa-miR-376a#		GUAGAUUCUCCUUCUAUGAGUA	hsa-miR-376a-5p	hsa-miR-376a*(17)
154	G10	002128	hsa-miR-377#		AGAGGUUGCCCUUGGUGAAUUC	hsa-miR-377-5p	hsa-miR-377*(17)
155	G11	000338	ath-miR159a	++	UUUGGAUUGAAGGGAGCUCUA	ath-miR159a	NA
156	G12	002129	hsa-miR-30b#		CUGGGAGGUGGAUGUUUACUUC	hsa-miR-30b-3p	hsa-miR-30b*(17)
157	G13	002130	hsa-miR-122#		AACGCCAUUAUCACACUAAAUA	hsa-miR-122-3p	hsa-miR-122*(17)
158	G14	002131	hsa-miR-130a#		UUCACAUUGUGCUACUGUCUGC	hsa-miR-130a-5p	hsa-miR-130a*(17)
159	G15	002132	hsa-miR-132#		ACCGUGGCUUUCGAUUGUUACU	hsa-miR-132-5p	hsa-miR-132*(17)
160	G16	002134	hsa-miR-148a#		AAAGUUCUGAGACACUCCGACU	hsa-miR-148a-5p	hsa-miR-148a*(17)
161	G17	002135	hsa-miR-33a		GUGCAUUGUAGUUGCAUUGCA	hsa-miR-33a-5p	hsa-miR-33a(17)
162	G18	002136	hsa-miR-33a#		CAAUGUUUCCACAGUGCAUCAC	hsa-miR-33a-3p	hsa-miR-33a*(17)
163	G19	002137	hsa-miR-92a-1#		AGGUUGGGAUCGGUUGCAAUGCU	hsa-miR-92a-1-5p	hsa-miR-92a-1*(17)
164	G20	002138	hsa-miR-92a-2#		GGGUGGGGAUUUGUUGCAUUAC	hsa-miR-92a-2-5p	hsa-miR-92a-2*(17)
165	G21	002139	hsa-miR-93#		ACUGCUGAGCUAGCACUUCCCG	hsa-miR-93-3p	hsa-miR-93*(17)
166	G22	002140	hsa-miR-96#		AAUCAUGUGCAGUGCCAAUAUG	hsa-miR-96-3p	hsa-miR-96*(17)
167	G23	002141	hsa-miR-99a#		CAAGCUCGCUUCUAUGGGUCUG	hsa-miR-99a-3p	hsa-miR-99a*(17)
168	G24	002142	hsa-miR-100#		CAAGCUUGUAUCUAUAGGUAUG	hsa-miR-100-3p	hsa-miR-100*(17)
169	H1	002143	hsa-miR-101#		CAGUUAUCACAGUGCUGAUGCU	hsa-miR-101-5p	hsa-miR-101*(17)
170	H2	002144	hsa-miR-138-2#		GCUAUUUCACGACACCAGGGUU	hsa-miR-138-2-3p	hsa-miR-138-2*(17)
171	H3	002145	hsa-miR-141#		CAUCUUCCAGUACAGUGUUGGA	hsa-miR-141-5p	hsa-miR-141*(17)
172	H4	002146	hsa-miR-143#		GGUGCAGUGCUGCAUCUCUGGU	hsa-miR-143-5p	hsa-miR-143*(17)
173	H5	002148	hsa-miR-144#		GGAUAUCAUCAUAUACUGUAAG	hsa-miR-144-5p	hsa-miR-144*(17)
174	H6	002149	hsa-miR-145#		GGAUUCCUGGAAAUACUGUUCU	hsa-miR-145-3p	hsa-miR-145*(17)
175	H7	002150	hsa-miR-920		GGGGAGCUGUGGAAGCAGUA	hsa-miR-920	NA
176	H8	002151	hsa-miR-921		CUAGUGAGGGACAGAACCAGGAUUC	hsa-miR-921	NA
177	H9	002152	hsa-miR-922		GCAGCAGAGAAUAGGACUACGUC	hsa-miR-922	NA
178	H10	002154	hsa-miR-924		AGAGUCUUGUGAUGUCUUGC	hsa-miR-924	NA
179	H11	002157	hsa-miR-337-3p		CUCCUAUAUGAUGCCUUUCUUC	hsa-miR-337-3p	NA
180	H12	002158	hsa-miR-125b-2#		UCACAAGUCAGGCUCUUGGGAC	hsa-miR-125b-2-3p	hsa-miR-125b-2*(17)
181	H13	002159	hsa-miR-135b#		AUGUAGGGCUAAAAGCCAUGGG	hsa-miR-135b-3p	hsa-miR-135b*(17)
182	H14	002160	hsa-miR-148b#		AAGUUCUGUUAUACACUCAGGC	hsa-miR-148b-5p	hsa-miR-148b*(17)
183	H15	002163	hsa-miR-146a#		CCUCUGAAAUUCAGUUCUUCAG	hsa-miR-146a-3p	hsa-miR-146a*(17)
184	H16	002164	hsa-miR-149#		AGGGAGGGACGGGGGCUGUGC	hsa-miR-149-3p	hsa-miR-149*(17)
185	H17	002165	hsa-miR-29b-1#		GCUGGUUUCAUAUGGUGGUUUAGA	hsa-miR-29b-1-5p	hsa-miR-29b-1*(17)
186	H18	002166	hsa-miR-29b-2#		CUGGUUUCACAUGGUGGCUUAG	hsa-miR-29b-2-5p	hsa-miR-29b-2*(17)
187	H19	002168	hsa-miR-105#		ACGGAUGUUUGAGCAUGUGCUA	hsa-miR-105-3p	hsa-miR-105*(17)
188	H20	002170	hsa-miR-106a#		CUGCAAUGUAAGCACUUCUUAC	hsa-miR-106a-3p	hsa-miR-106a*(17)
189	H21	002171	hsa-miR-16-2#		CCAAUAUUACUGUGCUGCUUUA	hsa-miR-16-2-3p	hsa-miR-16-2*(17)
190	H22	002172	hsa-let-7i#		CUGCGCAAGCUACUGCCUUGCU	hsa-let-7i-3p	hsa-let-7i*(17)
191	H23	002173	hsa-miR-15b#		CGAAUCAUUAUUUGCUGCUCUA	hsa-miR-15b-3p	hsa-miR-15b*(17)
192	H24	002174	hsa-miR-27b#		AGAGCUUAGCUGAUUGGUGAAC	hsa-miR-27b-5p	hsa-miR-27b*(17)
193	I1	002176	hsa-miR-933		UGUGCGCAGGGAGACCUCUCCC	hsa-miR-933	NA
194	I2	002177	hsa-miR-934		UGUCUACUACUGGAGACACUGG	hsa-miR-934	NA
195	I3	002178	hsa-miR-935		CCAGUUACCGCUUCCGCUACCGC	hsa-miR-935	NA
196	I4	002179	hsa-miR-936		ACAGUAGAGGGAGGAAUCGCAG	hsa-miR-936	NA
197	I5	002180	hsa-miR-937		AUCCGCGCUCUGACUCUCUGCC	hsa-miR-937-3p	hsa-miR-937(18)
198	I6	002181	hsa-miR-938		UGCCCUUAAAGGUGAACCCAGU	hsa-miR-938	NA
199	I7	002182	hsa-miR-939		UGGGGAGCUGAGGCUCUGGGGGUG	hsa-miR-939-5p	hsa-miR-939(18)
200	I8	002183	hsa-miR-941		CACCCGGCUGUGUGCACAUGUGC	hsa-miR-941	NA
201	I9	002185	hsa-miR-335#		UUUUUCAUUAUUGCUCCUGACC	hsa-miR-335-3p	hsa-miR-335*(17)
202	I10	002187	hsa-miR-942		UCUUCUCUGUUUUGGCCAUGUG	hsa-miR-942-5p	hsa-miR-942(19)
203	I11	002188	hsa-miR-943		CUGACUGUUGCCGUCCUCCAG	hsa-miR-943	NA
204	I12	002189	hsa-miR-944		AAAUUAUUGUACAUCGGAUGAG	hsa-miR-944	NA
205	I13	002196	hsa-miR-99b#		CAAGCUCGUGUCUGUGGGUCCG	hsa-miR-99b-3p	hsa-miR-99b*(17)
206	I14	002197	hsa-miR-124#		CGUGUUCACAGCGGACCUUGAU	hsa-miR-124-5p	hsa-miR-124*(17)
207	I15	002200	hsa-miR-541#		AAAGGAUUCUGCUGUCGGUCCCACU	hsa-miR-541-5p	hsa-miR-541*(17)
208	I16	002203	hsa-miR-875-5p		UAUACCUCAGUUUUAUCAGGUG	hsa-miR-875-5p	NA
209	I17	002213	hsa-miR-888#		GACUGACACCUCUUUGGGUGAA	hsa-miR-888-3p	hsa-miR-888*(17)
210	I18	002214	hsa-miR-892b		CACUGGCUCCUUUCUGGGUAGA	hsa-miR-892b	NA
211	I19	002231	hsa-miR-9#		AUAAAGCUAGAUAACCGAAAGU	hsa-miR-9-3p	hsa-miR-9*(17)
212	I20	002238	hsa-miR-411#		UAUGUAACACGGUCCACUAACC	hsa-miR-411-3p	hsa-miR-411*(17)
213	I21	002243	hsa-miR-378		ACUGGACUUGGAGUCAGAAGG	NA	hsa-miR-378(17), hsa-miR-378a-3p(19)
214	I22	002254	hsa-miR-151-3p		CUAGACUGAAGCUCCUUGAGG	hsa-miR-151a-3p	hsa-miR-151-3p(17)
215	I23	002259	hsa-miR-340#		UCCGUCUCAGUUACUUUAUAGC	hsa-miR-340-3p	hsa-miR-340*(17)
216	I24	002263	hsa-miR-190b		UGAUAUGUUUGAUAUUGGGUU	hsa-miR-190b	NA
217	J1	002266	hsa-miR-545#		UCAGUAAAUGUUUAUUAGAUGA	hsa-miR-545-5p	hsa-miR-545*(17)
218	J2	002270	hsa-miR-183#		GUGAAUUACCGAAGGGCCAUAA	hsa-miR-183-3p	hsa-miR-183*(17)
219	J3	002272	hsa-miR-192#		CUGCCAAUUCCAUAGGUCACAG	hsa-miR-192-3p	hsa-miR-192*(17)
220	J4	002274	hsa-miR-200b#		CAUCUUACUGGGCAGCAUUGGA	hsa-miR-200b-5p	hsa-miR-200b*(17)
221	J5	002286	hsa-miR-200c#		CGUCUUACCCAGCAGUGUUUGG	hsa-miR-200c-5p	hsa-miR-200c*(17)
222	J6	002287	hsa-miR-155#		CUCCUACAUAUUAGCAUUAACA	hsa-miR-155-3p	hsa-miR-155*(17)
223	J7	002288	hsa-miR-10a#		CAAAUUCGUAUCUAGGGGAAUA	hsa-miR-10a-3p	hsa-miR-10a*(17)
224	J8	002293	hsa-miR-214#		UGCCUGUCUACACUUGCUGUGC	hsa-miR-214-5p	hsa-miR-214*(17)
225	J9	002294	hsa-miR-218-2#		CAUGGUUCUGUCAAGCACCGCG	hsa-miR-218-2-3p	hsa-miR-218-2*(17)
226	J10	002298	hsa-miR-129#		AAGCCCUUACCCCAAAAAGUAU	hsa-miR-129-1-3p	hsa-miR-129*(17)
227	J11	002301	hsa-miR-22#		AGUUCUUCAGUGGCAAGCUUUA	hsa-miR-22-5p	hsa-miR-22*(17)
228	J12	002302	hsa-miR-425#		AUCGGGAAUGUCGUGUCCGCCC	hsa-miR-425-3p	hsa-miR-425*(17)
229	J13	002305	hsa-miR-30d#		CUUUCAGUCAGAUGUUUGCUGC	hsa-miR-30d-3p	hsa-miR-30d*(17)
230	J14	002307	hsa-let-7a#		CUAUACAAUCUACUGUCUUUC	hsa-let-7a-3p	hsa-let-7a*(17)
231	J15	002309	hsa-miR-424#		CAAAACGUGAGGCGCUGCUAU	hsa-miR-424-3p	hsa-miR-424*(17)
232	J16	002310	hsa-miR-18b#		UGCCCUAAAUGCCCCUUCUGGC	hsa-miR-18b-3p	hsa-miR-18b*(17)
233	J17	002311	hsa-miR-20b#		ACUGUAGUAUGGGCACUUCCAG	hsa-miR-20b-3p	hsa-miR-20b*(17)
234	J18	002312	hsa-miR-431#		CAGGUCGUCUUGCAGGGCUUCU	hsa-miR-431-3p	hsa-miR-431*(17)
235	J19	002314	hsa-miR-7-2#		CAACAAAUCCCAGUCUACCUAA	hsa-miR-7-2-3p	hsa-miR-7-2*(17)
236	J20	002315	hsa-miR-10b#		ACAGAUUCGAUUCUAGGGGAAU	hsa-miR-10b-3p	hsa-miR-10b*(17)
237	J21	002316	hsa-miR-34a#		CAAUCAGCAAGUAUACUGCCCU	hsa-miR-34a-3p	hsa-miR-34a*(17)
238	J22	002317	hsa-miR-181a-2#		ACCACUGACCGUUGACUGUACC	hsa-miR-181a-2-3p	hsa-miR-181a-2*(17)
239	J23	002325	hsa-miR-744#		CUGUUGCCACUAACCUCAACCU	hsa-miR-744-3p	hsa-miR-744*(17)
240	J24	002330	hsa-miR-452#		CUCAUCUGCAAAGAAGUAAGUG	hsa-miR-452-3p	hsa-miR-452*(17)
241	K1	002332	hsa-miR-409-3p		GAAUGUUGCUCGGUGAACCCCU	hsa-miR-409-3p	NA
242	K2	002333	hsa-miR-181c#		AACCAUCGACCGUUGAGUGGAC	hsa-miR-181c-3p	hsa-miR-181c*(17)
243	K3	002336	hsa-miR-196a#		CGGCAACAAGAAACUGCCUGAG	hsa-miR-196a-3p	hsa-miR-196a*(17)
244	K4	002339	hsa-miR-483-3p		UCACUCCUCUCCUCCCGUCUU	hsa-miR-483-3p	NA
245	K5	002342	hsa-miR-708#		CAACUAGACUGUGAGCUUCUAG	hsa-miR-708-3p	hsa-miR-708*(17)
246	K6	002343	hsa-miR-92b#		AGGGACGGGACGCGGUGCAGUG	hsa-miR-92b-5p	hsa-miR-92b*(17)
247	K7	002346	hsa-miR-551b#		GAAAUCAAGCGUGGGUGAGACC	hsa-miR-551b-5p	hsa-miR-551b*(17)
248	K8	002362	hsa-miR-202#		UUCCUAUGCAUAUACUUCUUUG	hsa-miR-202-5p	hsa-miR-202*(17)
249	K9	002366	hsa-miR-193b#		CGGGGUUUUGAGGGCGAGAUGA	hsa-miR-193b-5p	hsa-miR-193b*(17)
250	K10	002368	hsa-miR-497#		CAAACCACACUGUGGUGUUAGA	hsa-miR-497-3p	hsa-miR-497*(17)
251	K11	002371	hsa-miR-518e#		CUCUAGAGGGAAGCGCUUUCUG	hsa-miR-518e-5p	hsa-miR-518e*(17), hsa-miR-519a*(17), hsa-miR-522*(17), hsa-miR-523*(17)
252	K12	002376	hsa-miR-543		AAACAUUCGCGGUGCACUUCUU	hsa-miR-543	NA
253	K13	002378	hsa-miR-125b-1#		ACGGGUUAGGCUCUUGGGAGCU	hsa-miR-125b-1-3p	hsa-miR-125b-1*(17)
254	K14	002379	hsa-miR-194#		CCAGUGGGGCUGCUGUUAUCUG	hsa-miR-194-3p	hsa-miR-194*(17)
255	K15	002380	hsa-miR-106b#		CCGCACUGUGGGUACUUGCUGC	hsa-miR-106b-3p	hsa-miR-106b*(17)
256	K16	002381	hsa-miR-302a#		ACUUAAACGUGGAUGUACUUGCU	hsa-miR-302a-5p	hsa-miR-302a*(17)
257	K17	002384	hsa-miR-519b-3p		AAAGUGCAUCCUUUUAGAGGUU	hsa-miR-519b-3p	NA
258	K18	002387	hsa-miR-518f#		CUCUAGAGGGAAGCACUUUCUC	hsa-miR-518f-5p	hsa-miR-518f*(17)
259	K19	002391	hsa-miR-374b#		CUUAGCAGGUUGUAUUAUCAUU	hsa-miR-374b-3p	hsa-miR-374b*(17)
260	K20	002400	hsa-miR-520c-3p		AAAGUGCUUCCUUUUAGAGGGU	hsa-miR-520c-3p	NA
261	K21	002404	hsa-let-7b#		CUAUACAACCUACUGCCUUCCC	hsa-let-7b-3p	hsa-let-7b*(17)
262	K22	002405	hsa-let-7c#		UAGAGUUACACCCUGGGAGUUA	NA	hsa-let-7c*(16)
263	K23	002407	hsa-let-7e#		CUAUACGGCCUCCUAGCUUUCC	hsa-let-7e-3p	hsa-let-7e*(17)
264	K24	002410	hsa-miR-550		AGUGCCUGAGGGAGUAAGAGCCC	hsa-miR-550a-5p	hsa-miR-550(15), hsa-miR-550a(17)
265	L1	002411	hsa-miR-593		UGUCUCUGCUGGGGUUUCU	hsa-miR-593-3p	hsa-miR-593(17)
266	L2	002417	hsa-let-7f-1#		CUAUACAAUCUAUUGCCUUCCC	hsa-let-7f-1-3p	hsa-let-7f-1*(17)
267	L3	002418	hsa-let-7f-2#		CUAUACAGUCUACUGUCUUUCC	hsa-let-7f-2-3p	hsa-let-7f-2*(17)
268	L4	002419	hsa-miR-15a#		CAGGCCAUAUUGUGCUGCCUCA	hsa-miR-15a-3p	hsa-miR-15a*(17)
269	L5	002420	hsa-miR-16-1#		CCAGUAUUAACUGUGCUGCUGA	hsa-miR-16-1-3p	hsa-miR-16-1*(17)
270	L6	002421	hsa-miR-17#		ACUGCAGUGAAGGCACUUGUAG	hsa-miR-17-3p	hsa-miR-17*(17)
271	L7	002423	hsa-miR-18a#		ACUGCCCUAAGUGCUCCUUCUGG	hsa-miR-18a-3p	hsa-miR-18a*(17)
272	L8	002424	hsa-miR-19a#		AGUUUUGCAUAGUUGCACUACA	hsa-miR-19a-5p	hsa-miR-19a*(17)
273	L9	002425	hsa-miR-19b-1#		AGUUUUGCAGGUUUGCAUCCAGC	hsa-miR-19b-1-5p	hsa-miR-19b-1*(17)
274	L10	002432	hsa-miR-625#		GACUAUAGAACUUUCCCCCUCA	hsa-miR-625-3p	hsa-miR-625*(17)
275	L11	002434	hsa-miR-628-3p		UCUAGUAAGAGUGGCAGUCGA	hsa-miR-628-3p	NA
276	L12	002437	hsa-miR-20a#		ACUGCAUUAUGAGCACUUAAAG	hsa-miR-20a-3p	hsa-miR-20a*(17)
277	L13	002438	hsa-miR-21#		CAACACCAGUCGAUGGGCUGU	hsa-miR-21-3p	hsa-miR-21*(17)
278	L14	002439	hsa-miR-23a#		GGGGUUCCUGGGGAUGGGAUUU	hsa-miR-23a-5p	hsa-miR-23a*(17)
279	L15	002440	hsa-miR-24-1#		UGCCUACUGAGCUGAUAUCAGU	hsa-miR-24-1-5p	hsa-miR-24-1*(17)
280	L16	002441	hsa-miR-24-2#		UGCCUACUGAGCUGAAACACAG	hsa-miR-24-2-5p	hsa-miR-24-2*(17)
281	L17	002442	hsa-miR-25#		AGGCGGAGACUUGGGCAAUUG	hsa-miR-25-5p	hsa-miR-25*(17)
282	L18	002443	hsa-miR-26a-1#		CCUAUUCUUGGUUACUUGCACG	hsa-miR-26a-1-3p	hsa-miR-26a-1*(17)
283	L19	002444	hsa-miR-26b#		CCUGUUCUCCAUUACUUGGCUC	hsa-miR-26b-3p	hsa-miR-26b*(17)
284	L20	002445	hsa-miR-27a#		AGGGCUUAGCUGCUUGUGAGCA	hsa-miR-27a-5p	hsa-miR-27a*(17)
285	L21	002447	hsa-miR-29a#		ACUGAUUUCUUUUGGUGUUCAG	hsa-miR-29a-5p	hsa-miR-29a*(17)
286	L22	002642	hsa-miR-151-5P		UCGAGGAGCUCACAGUCUAGU	hsa-miR-151a-5p	hsa-miR-151-5p(17)
287	L23	002643	hsa-miR-765		UGGAGGAGAAGGAAGGUGAUG	hsa-miR-765	NA
288	L24	002658	hsa-miR-338-5P		AACAAUAUCCUGGUGCUGAGUG	hsa-miR-338-5p	NA
289	M1	002672	hsa-miR-620		AUGGAGAUAGAUAUAGAAAU	hsa-miR-620	NA
290	M2	002675	hsa-miR-577		UAGAUAAAAUAUUGGUACCUG	hsa-miR-577	NA
291	M3	002676	hsa-miR-144		UACAGUAUAGAUGAUGUACU	hsa-miR-144-3p	hsa-miR-144(17)
292	M4	002677	hsa-miR-590-3P		UAAUUUUAUGUAUAAGCUAGU	hsa-miR-590-3p	NA
293	M5	002678	hsa-miR-191#		GCUGCGCUUGGAUUUCGUCCCC	hsa-miR-191-3p	hsa-miR-191*(17)
294	M6	002681	hsa-miR-665		ACCAGGAGGCUGAGGCCCCU	hsa-miR-665	NA
295	M7	002743	hsa-miR-520D-3P		AAAGUGCUUCUCUUUGGUGGGU	hsa-miR-520d-3p	NA
296	M8	002752	hsa-miR-1224-3P		CCCCACCUCCUCUCUCCUCAG	hsa-miR-1224-3p	NA
297	M9	002867	hsa-miR-1305		UUUUCAACUCUAAUGGGAGAGA	hsa-miR-1305	NA
298	M10	002756	hsa-miR-513C		UUCUCAAGGAGGUGUCGUUUAU	hsa-miR-513c-5p	hsa-miR-513c(17)
299	M11	002757	hsa-miR-513B		UUCACAAGGAGGUGUCAUUUAU	hsa-miR-513b-5p	hsa-miR-513b(19)
300	M12	002758	hsa-miR-1226#		GUGAGGGCAUGCAGGCCUGGAUGGGG	hsa-miR-1226-5p	hsa-miR-1226*(17)
301	M13	002761	hsa-miR-1236		CCUCUUCCCCUUGUCUCUCCAG	hsa-miR-1236-3p	hsa-miR-1236(18)
302	M14	002763	hsa-miR-1228#		GUGGGCGGGGGCAGGUGUGUG	hsa-miR-1228-5p	hsa-miR-1228*(17)
303	M15	002766	hsa-miR-1225-3P		UGAGCCCCUGUGCCGCCCCCAG	hsa-miR-1225-3p	NA
304	M16	002768	hsa-miR-1233		UGAGCCCUGUCCUCCCGCAG	hsa-miR-1233-3p	hsa-miR-1233(18)
305	M17	002769	hsa-miR-1227		CGUGCCACCCUUUUCCCCAG	hsa-miR-1227-3p	hsa-miR-1227(18)
306	M18	002773	hsa-miR-1286		UGCAGGACCAAGAUGAGCCCU	hsa-miR-1286	NA
307	M19	002775	hsa-miR-548M		CAAAGGUAUUUGUGGUUUUUG	hsa-miR-548m	NA
308	M20	002776	hsa-miR-1179		AAGCAUUCUUUCAUUGGUUGG	hsa-miR-1179	NA
309	M21	002777	hsa-miR-1178		UUGCUCACUGUUCUUCCCUAG	hsa-miR-1178-3p	hsa-miR-1178(18)
310	M22	002778	hsa-miR-1205		UCUGCAGGGUUUGCUUUGAG	hsa-miR-1205	NA
311	M23	002779	hsa-miR-1271		CUUGGCACCUAGCAAGCACUCA	hsa-miR-1271-5p	hsa-miR-1271(17)
312	M24	002781	hsa-miR-1201		AGCCUGAUUAAACACAUGCUCUGA	NA	hsa-miR-1201(15)
313	N1	002783	hsa-miR-548J		AAAAGUAAUUGCGGUCUUUGGU	hsa-miR-548j-5p	hsa-miR-548j(19)
314	N2	002784	hsa-miR-1263		AUGGUACCCUGGCAUACUGAGU	hsa-miR-1263	NA
315	N3	002785	hsa-miR-1294		UGUGAGGUUGGCAUUGUUGUCU	hsa-miR-1294	NA
316	N4	002789	hsa-miR-1269		CUGGACUGAGCCGUGCUACUGG	hsa-miR-1269a	hsa-miR-1269(17)
317	N5	002790	hsa-miR-1265		CAGGAUGUGGUCAAGUGUUGUU	hsa-miR-1265	NA
318	N6	002791	hsa-miR-1244		AAGUAGUUGGUUUGUAUGAGAUGGUU	hsa-miR-1244	NA
319	N7	002792	hsa-miR-1303		UUUAGAGACGGGGUCUUGCUCU	hsa-miR-1303	NA
320	N8	002796	hsa-miR-1259		AUAUAUGAUGACUUAGCUUUU	NA	hsa-miR-1259(15)
321	N9	002798	hsa-miR-548P		UAGCAAAAACUGCAGUUACUUU	hsa-miR-548p	NA
322	N10	002799	hsa-miR-1264		CAAGUCUUAUUUGAGCACCUGUU	hsa-miR-1264	NA
323	N11	002801	hsa-miR-1255B		CGGAUGAGCAAAGAAAGUGGUU	hsa-miR-1255b-5p	hsa-miR-1255b(17)
324	N12	002803	hsa-miR-1282		UCGUUUGCCUUUUUCUGCUU	hsa-miR-1282	NA
325	N13	002805	hsa-miR-1255A		AGGAUGAGCAAAGAAAGUAGAUU	hsa-miR-1255a	NA
326	N14	002807	hsa-miR-1270		CUGGAGAUAUGGAAGAGCUGUGU	hsa-miR-1270	NA
327	N15	002810	hsa-miR-1197		UAGGACACAUGGUCUACUUCU	hsa-miR-1197	NA
328	N16	002815	hsa-miR-1324		CCAGACAGAAUUCUAUGCACUUUC	hsa-miR-1324	NA
329	N17	002816	hsa-miR-548H		AAAAGUAAUCGCGGUUUUUGUC	hsa-miR-548h-5p	hsa-miR-548h(17)
330	N18	002818	hsa-miR-1254		AGCCUGGAAGCUGGAGCCUGCAGU	hsa-miR-1254	NA
331	N19	002819	hsa-miR-548K		AAAAGUACUUGCGGAUUUUGCU	hsa-miR-548k	NA
332	N20	002820	hsa-miR-1251		ACUCUAGCUGCCAAAGGCGCU	hsa-miR-1251-5p	hsa-miR-1251(19)
333	N21	002822	hsa-miR-1285		UCUGGGCAACAAAGUGAGACCU	hsa-miR-1285-3p	hsa-miR-1285(17)
334	N22	002823	hsa-miR-1245		AAGUGAUCUAAAGGCCUACAU	hsa-miR-1245a	hsa-miR-1245(17)
335	N23	002824	hsa-miR-1292		UGGGAACGGGUUCCGGCAGACGCUG	hsa-miR-1292-5p	hsa-miR-1292(18)
336	N24	002827	hsa-miR-1301		UUGCAGCUGCCUGGGAGUGACUUC	hsa-miR-1301-3p	hsa-miR-1301(19)
337	O1	002829	hsa-miR-1200		CUCCUGAGCCAUUCUGAGCCUC	hsa-miR-1200	NA
338	O2	002830	hsa-miR-1182		GAGGGUCUUGGGAGGGAUGUGAC	hsa-miR-1182	NA
339	O3	002832	hsa-miR-1288		UGGACUGCCCUGAUCUGGAGA	hsa-miR-1288-3p	hsa-miR-1288(19)
340	O4	002838	hsa-miR-1291		UGGCCCUGACUGAAGACCAGCAGU	hsa-miR-1291	NA
341	O5	002840	hsa-miR-1275		GUGGGGGAGAGGCUGUC	hsa-miR-1275	NA
342	O6	002841	hsa-miR-1183		CACUGUAGGUGAUGGUGAGAGUGGGCA	hsa-miR-1183	NA
343	O7	002842	hsa-miR-1184		CCUGCAGCGACUUGAUGGCUUCC	hsa-miR-1184	NA
344	O8	002843	hsa-miR-1276		UAAAGAGCCCUGUGGAGACA	hsa-miR-1276	NA
345	O9	002844	hsa-miR-320B		AAAAGCUGGGUUGAGAGGGCAA	hsa-miR-320b	NA
346	O10	002845	hsa-miR-1272		GAUGAUGAUGGCAGCAAAUUCUGAAA	hsa-miR-1272	NA
347	O11	002847	hsa-miR-1180		UUUCCGGCUCGCGUGGGUGUGU	hsa-miR-1180-3p	hsa-miR-1180(19)
348	O12	002850	hsa-miR-1256		AGGCAUUGACUUCUCACUAGCU	hsa-miR-1256	NA
349	O13	002851	hsa-miR-1278		UAGUACUGUGCAUAUCAUCUAU	hsa-miR-1278	NA
350	O14	002852	hsa-miR-1262		AUGGGUGAAUUUGUAGAAGGAU	hsa-miR-1262	NA
351	O15	002854	hsa-miR-1243		AACUGGAUCAAUUAUAGGAGUG	hsa-miR-1243	NA
352	O16	002857	hsa-miR-663B		GGUGGCCCGGCCGUGCCUGAGG	hsa-miR-663b	NA
353	O17	002860	hsa-miR-1252		AGAAGGAAAUUGAAUUCAUUUA	hsa-miR-1252-5p	hsa-miR-1252(19)
354	O18	002861	hsa-miR-1298		UUCAUUCGGCUGUCCAGAUGUA	hsa-miR-1298-5p	hsa-miR-1298(19)
355	O19	002863	hsa-miR-1290		UGGAUUUUUGGAUCAGGGA	hsa-miR-1290	NA
356	O20	002868	hsa-miR-1249		ACGCCCUUCCCCCCCUUCUUCA	hsa-miR-1249	NA
357	O21	002870	hsa-miR-1248		ACCUUCUUGUAUAAGCACUGUGCUAAA	hsa-miR-1248	NA
358	O22	002871	hsa-miR-1289		UGGAGUCCAGGAAUCUGCAUUUU	hsa-miR-1289	NA
359	O23	002872	hsa-miR-1204		UCGUGGCCUGGUCUCCAUUAU	hsa-miR-1204	NA
360	O24	002873	hsa-miR-1826		AUUGAUCAUCGACACUUCGAACGCAAU	NA	hsa-miR-1826(15)
361	P1	002874	hsa-miR-1304		UUUGAGGCUACAGUGAGAUGUG	hsa-miR-1304-5p	hsa-miR-1304(17)
362	P2	002877	hsa-miR-1203		CCCGGAGCCAGGAUGCAGCUC	hsa-miR-1203	NA
363	P3	002878	hsa-miR-1206		UGUUCAUGUAGAUGUUUAAGC	hsa-miR-1206	NA
364	P4	002879	hsa-miR-548G		AAAACUGUAAUUACUUUUGUAC	hsa-miR-548g-3p	hsa-miR-548g(17)
365	P5	002880	hsa-miR-1208		UCACUGUUCAGACAGGCGGA	hsa-miR-1208	NA
366	P6	002881	hsa-miR-548E		AAAAACUGAGACUACUUUUGCA	hsa-miR-548e-3p	hsa-miR-548e(19)
367	P7	002883	hsa-miR-1274A		GUCCCUGUUCAGGCGCCA	NA	hsa-miR-1274a(16)
368	P8	002884	hsa-miR-1274B		UCCCUGUUCGGGCGCCA	NA	hsa-miR-1274b(16)
369	P9	002885	hsa-miR-1267		CCUGUUGAAGUGUAAUCCCCA	hsa-miR-1267	NA
370	P10	002887	hsa-miR-1250		ACGGUGCUGGAUGUGGCCUUU	hsa-miR-1250-5p	hsa-miR-1250(19)
371	P11	002888	hsa-miR-548N		CAAAAGUAAUUGUGGAUUUUGU	hsa-miR-548n	NA
372	P12	002890	hsa-miR-1283		UCUACAAAGGAAAGCGCUUUCU	hsa-miR-1283	NA
373	P13	002893	hsa-miR-1247		ACCCGUCCCGUUCGUCCCCGGA	hsa-miR-1247-5p	hsa-miR-1247(17)
374	P14	002894	hsa-miR-1253		AGAGAAGAAGAUCAGCCUGCA	hsa-miR-1253	NA
375	P15	002895	hsa-miR-720		UCUCGCUGGGGCCUCCA	NA	hsa-miR-720(18)
376	P16	002896	hsa-miR-1260		AUCCCACCUCUGCCACCA	hsa-miR-1260a	hsa-miR-1260(17)
377	P17	002897	hsa-miR-664		UAUUCAUUUAUCCCCAGCCUACA	hsa-miR-664a-3p	hsa-miR-664(17), hsa-miR-664-3p(18)
378	P18	002901	hsa-miR-1302		UUGGGACAUACUUAUGCUAAA	hsa-miR-1302	NA
379	P19	002902	hsa-miR-1300		UUGAGAAGGAGGCUGCUG	NA	hsa-miR-1300(13)
380	P20	002903	hsa-miR-1284		UCUAUACAGACCCUGGCUUUUC	hsa-miR-1284	NA
381	P21	002904	hsa-miR-548L		AAAAGUAUUUGCGGGUUUUGUC	hsa-miR-548l	NA
382	P22	002905	hsa-miR-1293		UGGGUGGUCUGGAGAUUUGUGC	hsa-miR-1293	NA
383	P23	002907	hsa-miR-1825		UCCAGUGCCCUCCUCUCC	hsa-miR-1825	NA
384	P24	002908	hsa-miR-1296		UUAGGGCCCUGGCUCCAUCUCC	hsa-miR-1296-5p	hsa-miR-1296(19)

## Sheet: Part Numbers
	Part Numbers
	Species	Pool/Card	Megaplex™ Primer Pools			TaqMan® Array MicroRNA Cards	TaqMan® OpenArray® MicroRNA Panel
			RT	PreAmp	RT + PreAmp		Standard	QuantStudio™ 12K Flex
	Human	A	4399966	4399233	4401009	4398965
		B	4444281	4444303	4444749	4444910
		A + B	4444745	4444748	4444750	4444913	4461104	4470187
	Rodent	A	4399970	4399203	4401090	4398967
		B	4444292	4444308	4444752	4444899
		A + B	4444746	4444747	4444766	4444909	4461105	4470188
