# Supplementary material for: Monocyte subpopulations display disease-specific miRNA signatures depending on the subform of Spondyloarthropathy
Source: Front Immunol. 2023 Apr 17;14:1124894. doi: 10.3389/fimmu.2023.1124894 (PMC10149963; doi:10.3389/fimmu.2023.1124894)
Supplement: Supplementary File 5 — Detailed description of principal component analysis of differentailly expresssed miRNAs. [file Table_2.xlsx]

## Sheet: Classical monocytes
Correlations
			miR-23a	miR-34c	miR-591	miR-567	miR-661	miR-615	miR-630	miR-943	miR-617	miR-30b	miR-31	miR-27b	miR-1262	miR-302c	miR-17	miR-159a	miR-635	miR-548d-5p	miR-1300	miR-1227	miR-383	miR-30c	miR-370	miR-1285	miR-147b	miR-205	miR-642	miR-299-3p	miR-1254	miR-26a-2-3p	miR-548K	miR-30a-5p	miR-1255A	miR-378	miR-190b	miR-148b	miR-1244	miR-324-5p	miR-130b	miR-548a	miR-659	miR-638	miR-622	miR-548c
Spearman's ρ	miR-23a	Spearman's ρ	1	-0.106327	.326**	0.193356	.510**	.292*	.537**	.386**	.368**	.285*	-0.0882776	0.197725	0.215294	.331**	.267*	.276*	.314*	.622**	.437**	.578**	0.0892377	.336**	0.140745	.266*	0.124904	0.0690764	0.0238575	0.151114	0.179339	0.166139	.327**	.605**	0.240543	.657**	.513**	.471**	.503**	.511**	.469**	0.0186252	.342**	.392**	0.22379	0.161674
		p (two-sided)		0.406879	0.00916972	0.128925	1.99702e-05	0.0201178	5.60365e-06	0.00177901	0.00303356	0.0233579	0.491455	0.120341	0.0901595	0.00804884	0.0347064	0.0283181	0.012154	5.34632e-08	0.000338654	6.91985e-07	0.486737	0.00704084	0.271225	0.0350464	0.329377	0.590618	0.85276	0.237121	0.159608	0.193141	0.00882736	1.54209e-07	0.0575635	5.14634e-09	1.70811e-05	9.70864e-05	2.60616e-05	1.84733e-05	0.000107124	0.884802	0.00609168	0.00148683	0.0778756	0.205549
	miR-34c	Spearman's ρ	-0.106327	1	0.0139209	-0.063076	-.306*	-.275*	-0.219614	0.0202093	-0.0855895	0.238959	0.148329	0.145833	0.105127	4.80031e-05	-0.111703	-0.0698925	-.353**	-0.229935	-0.196957	-0.0968702	0.205021	0.162874	-0.110071	-.277*	-0.105607	-0.0601959	0.158602	-0.0377784	-.370**	0.0524194	-.263*	-0.0686924	0.0573157	-0.114823	-0.093558	0.031682	-0.0998464	-0.0734927	0.000576037	-0.062596	-0.185052	-0.0564996	-0.00513633	-0.0346102
		p (two-sided)	0.406879		0.913769	0.623345	0.0148372	0.0294213	0.083736	0.875079	0.504793	0.0592782	0.245974	0.2541	0.412225	0.999702	0.38343	0.586227	0.00451269	0.0698506	0.121818	0.45009	0.106985	0.202159	0.390462	0.0280619	0.410082	0.639322	0.214409	0.768791	0.0028459	0.683263	0.0369311	0.592689	0.655463	0.370199	0.465803	0.805299	0.436224	0.567035	0.996425	0.625996	0.146512	0.660065	0.968131	0.787707
	miR-591	Spearman's ρ	.326**	0.0139209	1	0.201661	.251*	0.147993	0.169739	0.0896697	0.0965822	0.192156	-0.00907258	0.0869816	.280*	0.217214	.264*	.420**	0.163354	0.137865	0.143049	0.159418	0.00436828	0.18558	.248*	0.117175	0.0857815	0.094326	0.00868856	.372**	9.60061e-05	0.244432	.274*	0.129752	.323**	.256*	0.109255	0.199549	0.18606	0.194028	0.193356	0.109975	0.149962	0.159034	0.047331	.253*
		p (two-sided)	0.00916972	0.913769		0.112986	0.0475277	0.247057	0.183533	0.484621	0.451444	0.131363	0.943739	0.497863	0.0260287	0.0872584	0.0366821	0.000618907	0.200815	0.281252	0.263377	0.21203	0.972895	0.145343	0.0498112	0.36041	0.503834	0.462133	0.946117	0.00270922	0.999404	0.0535249	0.0297473	0.310799	0.00992413	0.042773	0.394006	0.116889	0.144286	0.127575	0.128925	0.390878	0.240757	0.213147	0.712603	0.0457123
	miR-567	Spearman's ρ	0.193356	-0.063076	0.201661	1	-0.0665803	.287*	0.0457949	0.113671	0.0505472	-0.0486271	0.0552035	.314*	0.209821	0.0688364	0.188892	0.208573	0.0548195	0.0189132	-0.0224174	0.0832373	.282*	0.015025	0.157114	0.127688	.348**	0.0257776	-0.0603879	0.200461	0.0413786	0.168155	0.0766129	0.169067	0.216878	0.0642761	0.142569	-0.0497312	0.112087	-0.0955741	-0.078581	0.0749328	-0.123128	-0.120488	0.143193	-0.0140169
		p (two-sided)	0.128925	0.623345	0.112986		0.604139	0.0226625	0.721545	0.375052	0.694007	0.705088	0.667401	0.0121401	0.0988437	0.591912	0.138169	0.100913	0.66958	0.883033	0.861558	0.516615	0.0250081	0.906959	0.218796	0.318625	0.00523012	0.841058	0.638251	0.115191	0.747457	0.187717	0.550643	0.1853	0.0877608	0.616739	0.264999	0.698709	0.381786	0.456203	0.540422	0.559441	0.336355	0.346898	0.262892	0.913176
	miR-661	Spearman's ρ	.510**	-.306*	.251*	-0.0665803	1	.335**	.356**	.251*	0.241167	0.0763249	-0.0486751	-0.0142569	0.0912058	0.174779	0.237711	.349**	.388**	.584**	.484**	.486**	-0.0729167	0.0483871	0.209293	.347**	0.0743568	0.233247	0.0265457	.361**	.334**	-0.0667723	.316*	.378**	0.235599	.606**	.404**	.387**	.673**	.328**	.278*	.273*	.755**	.692**	0.0567396	.275*
		p (two-sided)	1.99702e-05	0.0148372	0.0475277	0.604139		0.00733989	0.00414689	0.0470902	0.0568992	0.552146	0.70481	0.911695	0.477139	0.170669	0.0606581	0.00505322	0.0016893	5.09165e-07	5.93527e-05	5.47017e-05	0.570086	0.706478	0.0997149	0.00529702	0.562473	0.0658075	0.836387	0.00368865	0.00752095	0.603094	0.0116094	0.00222849	0.0630522	1.40267e-07	0.00101884	0.00174113	1.52522e-09	0.00870188	0.0273606	0.0304995	8.40461e-13	3.37646e-10	0.65871	0.0292741
	miR-615	Spearman's ρ	.292*	-.275*	0.147993	.287*	.335**	1	0.114679	0.160282	.313*	-0.147321	0.103447	0.183324	0.214718	0.175979	.305*	.500**	0.241599	0.174587	0.21971	.302*	0.156298	-0.0686924	.285*	.447**	.286*	0.144009	0.154474	.292*	.428**	0.231183	0.16369	0.184764	0.11924	.309*	0.211886	0.0636041	0.172859	0.115735	0.0255376	0.0770449	.264*	0.16393	0.116215	0.0880376
		p (two-sided)	0.0201178	0.0294213	0.247057	0.0226625	0.00733989		0.370804	0.209531	0.0124203	0.249234	0.419777	0.150386	0.0910444	0.167705	0.0149033	2.97761e-05	0.0564429	0.171146	0.0835975	0.0161369	0.221228	0.592689	0.0233579	0.000240851	0.0229721	0.260153	0.226733	0.0200111	0.000463847	0.0683044	0.199877	0.147152	0.351952	0.0137053	0.0954946	0.620435	0.175489	0.366385	0.842519	0.548391	0.0364346	0.199209	0.364386	0.492639
	miR-630	Spearman's ρ	.537**	-0.219614	0.169739	0.0457949	.356**	0.114679	1	.424**	0.19086	0.110071	0.06226	-0.0945661	0.122312	0.139017	0.171659	0.063028	.281*	.303*	.476**	.268*	-0.0292339	0.211598	0.0179051	.419**	0.241407	0.110935	0.236271	-0.0525154	0.165179	0.15025	.311*	.302*	0.164075	0.219038	.371**	.263*	.339**	.292*	.313*	0.152362	0.135561	0.147897	0.188268	0.0958141
		p (two-sided)	5.60365e-06	0.083736	0.183533	0.721545	0.00414689	0.370804		0.000541951	0.134034	0.390462	0.627855	0.460989	0.339592	0.277212	0.178552	0.62361	0.025896	0.0159429	8.04665e-05	0.0338019	0.820083	0.0959565	0.889227	0.000630818	0.0566454	0.38673	0.0622823	0.682714	0.195763	0.239845	0.0129682	0.0162971	0.19881	0.084571	0.00279585	0.0369311	0.00659593	0.0201178	0.0125197	0.233225	0.289448	0.247367	0.1395	0.455068
	miR-943	Spearman's ρ	.386**	0.0202093	0.0896697	0.113671	.251*	0.160282	.424**	1	.323**	0.0595718	.456**	0.246736	.258*	0.15457	0.222734	0.107335	0.227583	.307*	.285*	.375**	0.239775	0.159898	-0.0668203	.329**	0.226863	0.0424827	.405**	0.164603	.320*	0.156874	0.185916	.355**	0.0636041	.262*	.302*	.299*	.302*	.404**	.258*	-0.0544835	0.168011	-0.0448829	0.116935	-0.11996
		p (two-sided)	0.00177901	0.875079	0.484621	0.375052	0.0470902	0.209531	0.000541951		0.00973924	0.642805	0.000174448	0.0512426	0.0415788	0.226441	0.0793258	0.40242	0.0728407	0.0143335	0.0236509	0.00247034	0.0583898	0.210639	0.602833	0.00837483	0.0737761	0.740952	0.00100808	0.197348	0.0106697	0.219509	0.144602	0.00428435	0.620435	0.0382337	0.0162435	0.0173813	0.0160661	0.0010391	0.041187	0.671489	0.188101	0.726872	0.361402	0.349031
	miR-617	Spearman's ρ	.368**	-0.0855895	0.0965822	0.0505472	0.241167	.313*	0.19086	.323**	1	-0.139929	.253*	.336**	-0.185676	-0.0799731	0.0758929	0.237951	.265*	.293*	.409**	.304*	.339**	-0.0742127	.344**	.570**	0.0212654	0.0445469	.358**	0.145785	.424**	-0.062452	0.0263057	0.183036	-0.00350422	.271*	0.0970142	0.144105	0.226815	.258*	0.111559	-0.0377304	0.113815	0.00427227	0.015553	-0.0242416
		p (two-sided)	0.00303356	0.504793	0.451444	0.694007	0.0568992	0.0124203	0.134034	0.00973924		0.274041	0.0455848	0.00705813	0.145131	0.533248	0.554405	0.0603907	0.0360833	0.0195889	0.000885338	0.0152882	0.0065715	0.563232	0.00583782	1.0849e-06	0.868608	0.728838	0.0039662	0.254258	0.000538471	0.626793	0.837846	0.151039	0.978255	0.0317676	0.449413	0.259832	0.0738388	0.0412651	0.384047	0.769076	0.374443	0.97349	0.903704	0.850417
	miR-30b	Spearman's ρ	.285*	0.238959	0.192156	-0.0486271	0.0763249	-0.147321	0.110071	0.0595718	-0.139929	1	0.0290899	0.168539	.411**	0.229455	.312*	0.0326901	-0.169547	.473**	0.0607719	.318*	-0.0460349	.946**	-0.108967	-0.220382	-0.00484831	-0.00566436	-0.101526	-0.0211214	-.328**	.280*	0.115879	.564**	.375**	.376**	.435**	.696**	.418**	.556**	.719**	-0.0390745	-0.0287058	0.112615	0.101815	0.211502
		p (two-sided)	0.0233579	0.0592782	0.131363	0.705088	0.552146	0.249234	0.390462	0.642805	0.274041		0.820954	0.186696	0.000819612	0.0704527	0.0127785	0.799232	0.184036	8.89168e-05	0.636113	0.0111374	0.720146	1.46397e-31	0.395261	0.0826329	0.969917	0.964857	0.428504	0.86949	0.00877489	0.0265115	0.365784	1.45787e-06	0.00243297	0.0024061	0.000365141	2.48479e-10	0.000652164	2.19144e-06	3.09759e-11	0.76109	0.82328	0.379534	0.427189	0.0961109
	miR-31	Spearman's ρ	-0.0882776	0.148329	-0.00907258	0.0552035	-0.0486751	0.103447	0.06226	.456**	.253*	0.0290899	1	.369**	0.00196813	-0.0187212	0.167723	0.0170891	0.0137769	-0.0509313	0.217022	-0.122552	.358**	0.0744528	0.0431548	.356**	0.155194	0.030674	.697**	-0.0230895	0.135177	0.113479	0.0664843	-0.0184812	0.0749808	-0.140649	0.146937	0.101815	0.0210733	0.158842	0.16249	-0.031346	-0.157594	-0.239631	0.015793	-4.80031e-05
		p (two-sided)	0.491455	0.245974	0.943739	0.667401	0.70481	0.419777	0.627855	0.000174448	0.0455848	0.820954		0.00292048	0.987786	0.884212	0.18887	0.894246	0.914657	0.691798	0.0875452	0.338638	0.0039144	0.561967	0.737001	0.00423993	0.224549	0.811379	2.18453e-10	0.85745	0.29083	0.375864	0.604662	0.885686	0.559189	0.271555	0.250484	0.427189	0.869784	0.213707	0.203239	0.807325	0.217374	0.0585458	0.902225	0.999702
	miR-27b	Spearman's ρ	0.197725	0.145833	0.0869816	.314*	-0.0142569	0.183324	-0.0945661	0.246736	.336**	0.168539	.369**	1	0.0884697	0.030626	.282*	0.128888	-0.0602439	0.165419	-0.0851094	0.220718	.409**	0.245008	0.238143	0.113191	0.227631	-0.077381	0.144249	0.181692	-0.0450269	0.178859	-0.0480991	.427**	0.141369	0.235551	.332**	.322**	0.148474	.262*	.290*	-0.112951	-0.0853975	-0.118328	0.147561	0.0290419
		p (two-sided)	0.120341	0.2541	0.497863	0.0121401	0.911695	0.150386	0.460989	0.0512426	0.00705813	0.186696	0.00292048		0.49051	0.811669	0.0249824	0.31406	0.639054	0.195105	0.507194	0.0821539	0.000870483	0.0529467	0.0601775	0.377085	0.0727786	0.546643	0.259351	0.154115	0.72603	0.160747	0.708147	0.000483134	0.269084	0.0631075	0.00781877	0.00997083	0.24551	0.0384176	0.0211004	0.378104	0.505753	0.355674	0.248455	0.821245
	miR-1262	Spearman's ρ	0.215294	0.105127	.280*	0.209821	0.0912058	0.214718	0.122312	.258*	-0.185676	.411**	0.00196813	0.0884697	1	.336**	.450**	0.150394	-0.015745	0.143961	-0.061732	0.247024	-0.0593798	.456**	-0.0658122	0.0124808	.272*	-0.0594758	-0.0209773	0.214814	0.0740687	.338**	0.184236	.419**	.390**	.346**	.357**	0.237183	.268*	0.237279	.271*	0.0836694	0.0999424	0.153226	-0.0445949	-0.000384025
		p (two-sided)	0.0901595	0.412225	0.0260287	0.0988437	0.477139	0.0910444	0.339592	0.0415788	0.145131	0.000819612	0.987786	0.49051		0.00718021	0.000215504	0.239389	0.902521	0.260313	0.63078	0.0509629	0.643879	0.000174448	0.608326	0.92266	0.0312366	0.643342	0.870372	0.0908964	0.563991	0.00680262	0.148332	0.000621866	0.00158747	0.00540561	0.00404504	0.0612496	0.0334391	0.0611417	0.0317362	0.514433	0.435781	0.230554	0.728557	0.997617
	miR-302c	Spearman's ρ	.331**	4.80031e-05	0.217214	0.0688364	0.174779	0.175979	0.139017	0.15457	-0.0799731	0.229455	-0.0187212	0.030626	.336**	1	0.217934	0.129944	-0.0411866	0.188316	0.18918	0.239871	0.046275	0.229071	-0.0634121	-0.06226	0.147897	0.0979263	-0.00398425	.262*	0.0325941	0.190476	0.105847	.352**	0.193404	.348**	.315*	.336**	0.204109	.271*	.313*	0.11948	0.199453	.297*	.344**	0.0979263
		p (two-sided)	0.00804884	0.999702	0.0872584	0.591912	0.170669	0.167705	0.277212	0.226441	0.533248	0.0704527	0.884212	0.811669	0.00718021		0.0861897	0.310078	0.74859	0.139397	0.137558	0.058286	0.718747	0.0709373	0.621493	0.627855	0.247367	0.445142	0.975277	0.0382704	0.799809	0.134833	0.409013	0.00462486	0.128828	0.00518374	0.0118654	0.0070322	0.108589	0.0317362	0.0124771	0.350977	0.117068	0.018151	0.00583782	0.445142
	miR-17	Spearman's ρ	.267*	-0.111703	.264*	0.188892	0.237711	.305*	0.171659	0.222734	0.0758929	.312*	0.167723	.282*	.450**	0.217934	1	.441**	.335**	0.178283	0.0449789	0.144777	0.00244816	.329**	0.0773329	0.133689	0.210061	0.176795	0.00859255	0.112807	0.193356	.480**	.539**	.536**	.692**	.418**	.334**	.392**	.397**	.259*	.313*	0.235407	0.112855	0.161002	-0.0349942	.331**
		p (two-sided)	0.0347064	0.38343	0.0366821	0.138169	0.0606581	0.0149033	0.178552	0.0793258	0.554405	0.0127785	0.18887	0.0249824	0.000215504	0.0861897		0.000297365	0.00736681	0.162121	0.726311	0.257593	0.984807	0.00840503	0.546893	0.296222	0.0984496	0.165712	0.946712	0.378716	0.128925	6.96349e-05	5.0641e-06	5.89311e-06	3.29728e-10	0.000651133	0.00742994	0.0014674	0.00127395	0.0405277	0.012378	0.0632736	0.378512	0.207464	0.785407	0.00804884
	miR-159a	Spearman's ρ	.276*	-0.0698925	.420**	0.208573	.349**	.500**	0.063028	0.107335	0.237951	0.0326901	0.0170891	0.128888	0.150394	0.129944	.441**	1	.287*	.268*	0.128888	0.21611	0.214334	0.00830453	0.200941	0.126584	.255*	.371**	-0.015505	.420**	0.224126	0.191484	.266*	0.111175	.416**	.310*	0.0554916	0.198061	0.234639	0.102199	0.062212	.283*	.269*	.341**	-0.108391	0.22403
		p (two-sided)	0.0283181	0.586227	0.000618907	0.100913	0.00505322	2.97761e-05	0.62361	0.40242	0.0603907	0.799232	0.894246	0.31406	0.239389	0.310078	0.000297365		0.0223332	0.0335377	0.31406	0.0889174	0.0916381	0.948495	0.114305	0.322862	0.0432992	0.00278822	0.904	0.000604305	0.0774186	0.132743	0.0353893	0.385697	0.000704541	0.0135367	0.665768	0.119699	0.0641654	0.425438	0.628121	0.024803	0.032982	0.00620672	0.397779	0.0775489
	miR-635	Spearman's ρ	.314*	-.353**	0.163354	0.0548195	.388**	0.241599	.281*	0.227583	.265*	-0.169547	0.0137769	-0.0602439	-0.015745	-0.0411866	.335**	.287*	1	.355**	.389**	0.0396505	0.104647	-0.144777	.274*	.380**	.250*	.253*	0.137769	0.177371	.609**	0.216974	.371**	0.0697005	.355**	0.117416	0.168587	0.154474	.295*	.249*	0.197341	0.132152	0.0725806	0.18366	-0.0648041	0.178763
		p (two-sided)	0.012154	0.00451269	0.200815	0.66958	0.0016893	0.0564429	0.025896	0.0728407	0.0360833	0.184036	0.914657	0.639054	0.902521	0.74859	0.00736681	0.0223332		0.00433482	0.00163176	0.757675	0.414375	0.257593	0.0296878	0.00213362	0.0481903	0.0452885	0.281591	0.164315	1.17569e-07	0.087617	0.00272412	0.587259	0.00428435	0.359421	0.186569	0.226733	0.0189699	0.0486809	0.121078	0.301857	0.571869	0.149627	0.613841	0.160976
	miR-548d-5p	Spearman's ρ	.622**	-0.229935	0.137865	0.0189132	.584**	0.174587	.303*	.307*	.293*	.473**	-0.0509313	0.165419	0.143961	0.188316	0.178283	.268*	.355**	1	.419**	.547**	0.0853015	.505**	0.0752208	0.247168	0.0958141	0.121448	-0.0404666	0.202141	0.21251	0.113863	0.132296	.515**	0.1935	.580**	.562**	.759**	.661**	.713**	.693**	-0.131288	.326**	0.237663	0.135993	0.0752208
		p (two-sided)	5.34632e-08	0.0698506	0.281252	0.883033	5.09165e-07	0.171146	0.0159429	0.0143335	0.0195889	8.89168e-05	0.691798	0.195105	0.260313	0.139397	0.162121	0.0335377	0.00433482		0.000638874	3.54218e-06	0.506233	2.44964e-05	0.557928	0.0508236	0.455068	0.343041	0.752845	0.112114	0.0944998	0.37424	0.301326	1.56192e-05	0.128635	6.39551e-07	1.65136e-06	5.60606e-13	3.63446e-09	5.46707e-11	3.05803e-10	0.305057	0.00910466	0.0607116	0.2879	0.557928
	miR-1300	Spearman's ρ	.437**	-0.196957	0.143049	-0.0224174	.484**	0.21971	.476**	.285*	.409**	0.0607719	0.217022	-0.0851094	-0.061732	0.18918	0.0449789	0.128888	.389**	.419**	1	0.241263	0.0801651	0.118856	.311*	.589**	0.125816	0.159802	.403**	0.127304	.425**	0.0381144	0.0789651	0.0858775	0.0502112	.264*	.260*	.261*	.408**	.472**	.407**	0.0841974	.304*	0.236127	0.116023	0.047379
		p (two-sided)	0.000338654	0.121818	0.263377	0.861558	5.93527e-05	0.0835975	8.04665e-05	0.0236509	0.000885338	0.636113	0.0875452	0.507194	0.63078	0.137558	0.726311	0.31406	0.00163176	0.000638874		0.0567976	0.532263	0.353516	0.0129976	3.89037e-07	0.32583	0.210917	0.00105973	0.320094	0.000513018	0.766792	0.538438	0.503355	0.695941	0.0368598	0.0393105	0.0385652	0.000892166	9.40548e-05	0.000922777	0.511773	0.0154412	0.0624467	0.365185	0.712324
	miR-1227	Spearman's ρ	.578**	-0.0968702	0.159418	0.0832373	.486**	.302*	.268*	.375**	.304*	.318*	-0.122552	0.220718	0.247024	0.239871	0.144777	0.21611	0.0396505	.547**	0.241263	1	0.0980703	.363**	0.228399	0.212318	0.0502592	0.00883257	-0.0908218	0.129416	0.078053	0.0720046	0.0571237	.465**	0.12644	.566**	.418**	.504**	.580**	.513**	.457**	-0.151258	.505**	0.207325	0.207949	-0.0137289
		p (two-sided)	6.91985e-07	0.45009	0.21203	0.516615	5.47017e-05	0.0161369	0.0338019	0.00247034	0.0152882	0.0111374	0.338638	0.0821539	0.0509629	0.058286	0.257593	0.0889174	0.757675	3.54218e-06	0.0567976		0.44447	0.00346525	0.0717919	0.094805	0.695665	0.945225	0.479004	0.312065	0.543155	0.574932	0.656545	0.000121623	0.323417	1.31197e-06	0.000660467	2.59545e-05	6.41237e-07	1.74475e-05	0.00016626	0.23667	2.40442e-05	0.103015	0.10196	0.914954
	miR-383	Spearman's ρ	0.0892377	0.205021	0.00436828	.282*	-0.0729167	0.156298	-0.0292339	0.239775	.339**	-0.0460349	.358**	.409**	-0.0593798	0.046275	0.00244816	0.214334	0.104647	0.0853015	0.0801651	0.0980703	1	-0.0334581	.263*	0.217214	.255*	0.133929	.313*	0.157546	0.0222734	0.0124328	-0.219806	-0.00705645	0.109495	-0.0459869	0.00100806	0.200797	-0.0144969	0.188748	0.103207	-0.0585637	-0.179579	-0.142185	-0.00864055	-0.047619
		p (two-sided)	0.486737	0.106985	0.972895	0.0250081	0.570086	0.221228	0.820083	0.0583898	0.0065715	0.720146	0.0039144	0.000870483	0.643879	0.718747	0.984807	0.0916381	0.414375	0.506233	0.532263	0.44447		0.794616	0.0372532	0.0872584	0.0437486	0.295348	0.0126055	0.217516	0.862438	0.922957	0.0834592	0.956228	0.392962	0.720426	0.993744	0.11457	0.910215	0.138475	0.420863	0.648448	0.159041	0.266302	0.946414	0.710931
	miR-30c	Spearman's ρ	.336**	0.162874	0.18558	0.015025	0.0483871	-0.0686924	0.211598	0.159898	-0.0742127	.946**	0.0744528	0.245008	.456**	0.229071	.329**	0.00830453	-0.144777	.505**	0.118856	.363**	-0.0334581	1	-0.0926939	-0.0877976	0.101671	-0.0186732	-0.0457469	-0.0520833	-0.233631	.371**	0.132584	.642**	.299*	.410**	.507**	.689**	.383**	.641**	.769**	-0.123944	-0.0891897	-0.00115207	0.1238	0.0641801
		p (two-sided)	0.00704084	0.202159	0.145343	0.906959	0.706478	0.592689	0.0959565	0.210639	0.563232	1.46397e-31	0.561967	0.0529467	0.000174448	0.0709373	0.00840503	0.948495	0.257593	2.44964e-05	0.353516	0.00346525	0.794616		0.46995	0.493823	0.427846	0.884507	0.721825	0.685187	0.0653512	0.00275412	0.300265	1.42742e-08	0.0172496	0.000857174	2.18967e-05	4.17525e-10	0.00195188	1.5286e-08	1.87067e-13	0.333138	0.486972	0.99285	0.333704	0.617266
	miR-370	Spearman's ρ	0.140745	-0.110071	.248*	0.157114	0.209293	.285*	0.0179051	-0.0668203	.344**	-0.108967	0.0431548	0.238143	-0.0658122	-0.0634121	0.0773329	0.200941	.274*	0.0752208	.311*	0.228399	.263*	-0.0926939	1	.316*	0.0738767	0.046563	0.154474	0.223214	0.166187	0.0705645	-0.0147849	-0.0572197	0.0713326	0.102007	0.0766609	0.0476671	0.200797	0.0691724	0.0108007	0.130568	0.174875	0.12716	0.09303	0.230511
		p (two-sided)	0.271225	0.390462	0.0498112	0.218796	0.0997149	0.0233579	0.889227	0.602833	0.00583782	0.395261	0.737001	0.0601775	0.608326	0.621493	0.546893	0.114305	0.0296878	0.557928	0.0129976	0.0717919	0.0372532	0.46995		0.0116897	0.565005	0.71707	0.226733	0.078664	0.193011	0.582622	0.908439	0.656004	0.578515	0.426313	0.550392	0.710652	0.11457	0.5901	0.933046	0.30774	0.17043	0.320647	0.468335	0.0691335
	miR-1285	Spearman's ρ	.266*	-.277*	0.117175	0.127688	.347**	.447**	.419**	.329**	.570**	-0.220382	.356**	0.113191	0.0124808	-0.06226	0.133689	0.126584	.380**	0.247168	.589**	0.212318	0.217214	-0.0877976	.316*	1	0.0760369	-0.00436828	.515**	-0.00432028	.547**	0.108343	0.209149	0.0093126	-0.00768049	0.19062	0.187164	0.0750768	.270*	.266*	0.143481	-0.125672	0.192348	-0.00926459	0.0609159	-0.114967
		p (two-sided)	0.0350464	0.0280619	0.36041	0.318625	0.00529702	0.000240851	0.000630818	0.00837483	1.0849e-06	0.0826329	0.00423993	0.377085	0.92266	0.627855	0.296222	0.322862	0.00213362	0.0508236	3.89037e-07	0.094805	0.0872584	0.493823	0.0116897		0.553652	0.972895	1.54862e-05	0.973192	3.49227e-06	0.39799	0.0999536	0.942253	0.952361	0.134533	0.141878	0.558684	0.0321153	0.0352518	0.261923	0.326389	0.13097	0.942551	0.635312	0.369595
	miR-147b	Spearman's ρ	0.124904	-0.105607	0.0857815	.348**	0.0743568	.286*	0.241407	0.226863	0.0212654	-0.00484831	0.155194	0.227631	.272*	0.147897	0.210061	.255*	.250*	0.0958141	0.125816	0.0502592	.255*	0.101671	0.0738767	0.0760369	1	.441**	0.0865495	.306*	0.208573	.291*	-0.0100806	0.240015	.363**	0.0525634	0.141465	0.102775	0.0683564	0.191388	0.208669	0.185628	-0.126344	0.046611	-0.175067	0.0991263
		p (two-sided)	0.329377	0.410082	0.503834	0.00523012	0.562473	0.0229721	0.0566454	0.0737761	0.868608	0.969917	0.224549	0.0727786	0.0312366	0.247367	0.0984496	0.0432992	0.0481903	0.455068	0.32583	0.695665	0.0437486	0.427846	0.565005	0.553652		0.000299391	0.500008	0.0145591	0.100913	0.0207905	0.9375	0.0581306	0.00349308	0.682439	0.268756	0.42282	0.594504	0.132941	0.100752	0.145237	0.323787	0.71679	0.169954	0.439557
	miR-205	Spearman's ρ	0.0690764	-0.0601959	0.094326	0.0257776	0.233247	0.144009	0.110935	0.0424827	0.0445469	-0.00566436	0.030674	-0.077381	-0.0594758	0.0979263	0.176795	.371**	.253*	0.121448	0.159802	0.00883257	0.133929	-0.0186732	0.046563	-0.00436828	.441**	1	-0.0879416	.400**	0.210493	0.16057	0.1935	0.0712846	.335**	0.0656682	-0.0269297	0.0349462	0.217934	0.00172811	-0.0108007	.390**	0.0428187	.251*	-.257*	.351**
		p (two-sided)	0.590618	0.639322	0.462133	0.841058	0.0658075	0.260153	0.38673	0.740952	0.728838	0.964857	0.811379	0.546643	0.643342	0.445142	0.165712	0.00278822	0.0452885	0.343041	0.210917	0.945225	0.295348	0.884507	0.71707	0.972895	0.000299391		0.493112	0.00117727	0.0977434	0.208703	0.128635	0.578771	0.0071978	0.609113	0.834053	0.785695	0.0861897	0.989275	0.933046	0.00156914	0.738976	0.0469161	0.0419342	0.00484417
	miR-642	Spearman's ρ	0.0238575	0.158602	0.00868856	-0.0603879	0.0265457	0.154474	0.236271	.405**	.358**	-0.101526	.697**	0.144249	-0.0209773	-0.00398425	0.00859255	-0.015505	0.137769	-0.0404666	.403**	-0.0908218	.313*	-0.0457469	0.154474	.515**	0.0865495	-0.0879416	1	-0.122504	.279*	-0.0105607	0.0286098	-0.128024	-0.0727727	-0.0880856	-0.0401306	0.0122888	0.030818	0.237759	0.138009	-0.134841	-0.0256336	-0.127352	-0.0415227	-0.192828
		p (two-sided)	0.85276	0.214409	0.946117	0.638251	0.836387	0.226733	0.0622823	0.00100808	0.0039662	0.428504	2.18453e-10	0.259351	0.870372	0.975277	0.946712	0.904	0.281591	0.752845	0.00105973	0.479004	0.0126055	0.721825	0.226733	1.54862e-05	0.500008	0.493112		0.338829	0.0266469	0.93453	0.823861	0.317342	0.57085	0.492402	0.754832	0.923847	0.81051	0.0606045	0.280745	0.292042	0.841935	0.31991	0.746608	0.129993
	miR-299-3p	Spearman's ρ	0.151114	-0.0377784	.372**	0.200461	.361**	.292*	-0.0525154	0.164603	0.145785	-0.0211214	-0.0230895	0.181692	0.214814	.262*	0.112807	.420**	0.177371	0.202141	0.127304	0.129416	0.157546	-0.0520833	0.223214	-0.00432028	.306*	.400**	-0.122504	1	0.141993	0.185484	0.0321141	0.137913	.275*	.274*	0.0567876	0.0545315	0.178379	-0.0248656	-0.00700845	.307*	0.204637	.340**	-0.0419067	0.228927
		p (two-sided)	0.237121	0.768791	0.00270922	0.115191	0.00368865	0.0200111	0.682714	0.197348	0.254258	0.86949	0.85745	0.154115	0.0908964	0.0382704	0.378716	0.000604305	0.164315	0.112114	0.320094	0.312065	0.217516	0.685187	0.078664	0.973192	0.0145591	0.00117727	0.338829		0.266955	0.145555	0.802698	0.281083	0.0293329	0.0300163	0.658439	0.671217	0.161892	0.846613	0.956525	0.0142855	0.107659	0.00636308	0.744344	0.0711198
	miR-1254	Spearman's ρ	0.179339	-.370**	9.60061e-05	0.0413786	.334**	.428**	0.165179	.320*	.424**	-.328**	0.135177	-0.0450269	0.0740687	0.0325941	0.193356	0.224126	.609**	0.21251	.425**	0.078053	0.0222734	-0.233631	0.166187	.547**	0.208573	0.210493	.279*	0.141993	1	0.115831	.288*	-0.0347062	0.0534754	0.198253	0.133161	-0.0579397	0.227391	0.180252	0.0275538	0.00758449	0.216446	0.0539075	-0.114439	-0.0748368
		p (two-sided)	0.159608	0.0028459	0.999404	0.747457	0.00752095	0.000463847	0.195763	0.0106697	0.000538471	0.00877489	0.29083	0.72603	0.563991	0.799809	0.128925	0.0774186	1.17569e-07	0.0944998	0.000513018	0.543155	0.862438	0.0653512	0.193011	3.49227e-06	0.100913	0.0977434	0.0266469	0.266955		0.365984	0.0222864	0.787132	0.67723	0.119334	0.298151	0.651952	0.0730892	0.157461	0.830264	0.952956	0.0884099	0.674767	0.371812	0.559946
	miR-26a-2-3p	Spearman's ρ	0.166139	0.0524194	0.244432	0.168155	-0.0667723	0.231183	0.15025	0.156874	-0.062452	.280*	0.113479	0.178859	.338**	0.190476	.480**	0.191484	0.216974	0.113863	0.0381144	0.0720046	0.0124328	.371**	0.0705645	0.108343	.291*	0.16057	-0.0105607	0.185484	0.115831	1	.383**	.356**	.365**	.250*	.400**	0.219422	0.184332	0.174587	.314*	0.0102727	-0.236367	-0.165179	0.19302	0.0568836
		p (two-sided)	0.193141	0.683263	0.0535249	0.187717	0.603094	0.0683044	0.239845	0.219509	0.626793	0.0265115	0.375864	0.160747	0.00680262	0.134833	6.96349e-05	0.132743	0.087617	0.37424	0.766792	0.574932	0.922957	0.00275412	0.582622	0.39799	0.0207905	0.208703	0.93453	0.145555	0.365984		0.00194911	0.00420688	0.0032365	0.0477037	0.00115806	0.0840136	0.148117	0.171146	0.0122097	0.936312	0.062173	0.195763	0.129604	0.657898
	miR-548K	Spearman's ρ	.327**	-.263*	.274*	0.0766129	.316*	0.16369	.311*	0.185916	0.0263057	0.115879	0.0664843	-0.0480991	0.184236	0.105847	.539**	.266*	.371**	0.132296	0.0789651	0.0571237	-0.219806	0.132584	-0.0147849	0.209149	-0.0100806	0.1935	0.0286098	0.0321141	.288*	.383**	1	.323**	.387**	.389**	0.209533	0.133209	.317*	0.0949981	0.0967262	.301*	0.176027	0.199165	0.0421467	.269*
		p (two-sided)	0.00882736	0.0369311	0.0297473	0.550643	0.0116094	0.199877	0.0129682	0.144602	0.837846	0.365784	0.604662	0.708147	0.148332	0.409013	5.0641e-06	0.0353893	0.00272412	0.301326	0.538438	0.656545	0.0834592	0.300265	0.908439	0.0999536	0.9375	0.128635	0.823861	0.802698	0.0222864	0.00194911		0.00983131	0.00172369	0.00162234	0.0993182	0.297976	0.0113713	0.458935	0.450767	0.0166216	0.167587	0.117609	0.74293	0.032982
	miR-30a-5p	Spearman's ρ	.605**	-0.0686924	0.129752	0.169067	.378**	0.184764	.302*	.355**	0.183036	.564**	-0.0184812	.427**	.419**	.352**	.536**	0.111175	0.0697005	.515**	0.0858775	.465**	-0.00705645	.642**	-0.0572197	0.0093126	0.240015	0.0712846	-0.128024	0.137913	-0.0347062	.356**	.323**	1	.370**	.672**	.616**	.596**	.541**	.527**	.574**	0.115399	0.186972	.278*	0.132488	0.132104
		p (two-sided)	1.54209e-07	0.592689	0.310799	0.1853	0.00222849	0.147152	0.0162971	0.00428435	0.151039	1.45787e-06	0.885686	0.000483134	0.000621866	0.00462486	5.89311e-06	0.385697	0.587259	1.56192e-05	0.503355	0.000121623	0.956228	1.42742e-08	0.656004	0.942253	0.0581306	0.578771	0.317342	0.281083	0.787132	0.00420688	0.00983131		0.0028771	1.65919e-09	7.92744e-08	2.60577e-07	4.65914e-06	8.98096e-06	8.52231e-07	0.367787	0.142294	0.0274997	0.300618	0.302034
	miR-1255A	Spearman's ρ	0.240543	0.0573157	.323**	0.216878	0.235599	0.11924	0.164075	0.0636041	-0.00350422	.375**	0.0749808	0.141369	.390**	0.193404	.692**	.416**	.355**	0.1935	0.0502112	0.12644	0.109495	.299*	0.0713326	-0.00768049	.363**	.335**	-0.0727727	.275*	0.0534754	.365**	.387**	.370**	1	.328**	0.222494	.367**	.382**	0.218606	.297*	.468**	0.0272657	.265*	-0.204205	.471**
		p (two-sided)	0.0575635	0.655463	0.00992413	0.0877608	0.0630522	0.351952	0.19881	0.620435	0.978255	0.00243297	0.559189	0.269084	0.00158747	0.128828	3.29728e-10	0.000704541	0.00428435	0.128635	0.695941	0.323417	0.392962	0.0172496	0.578515	0.952361	0.00349308	0.0071978	0.57085	0.0293329	0.67723	0.0032365	0.00172369	0.0028771		0.00867075	0.0796584	0.00313357	0.00200802	0.0852015	0.0182296	0.000110337	0.832013	0.0359436	0.10842	9.81776e-05
	miR-378	Spearman's ρ	.657**	-0.114823	.256*	0.0642761	.606**	.309*	0.219038	.262*	.271*	.376**	-0.140649	0.235551	.346**	.348**	.418**	.310*	0.117416	.580**	.264*	.566**	-0.0459869	.410**	0.102007	0.19062	0.0525634	0.0656682	-0.0880856	.274*	0.198253	.250*	.389**	.672**	.328**	1	.499**	.459**	.595**	.496**	.415**	0.163354	.541**	.471**	0.130616	0.161338
		p (two-sided)	5.14634e-09	0.370199	0.042773	0.616739	1.40267e-07	0.0137053	0.084571	0.0382337	0.0317676	0.0024061	0.271555	0.0631075	0.00540561	0.00518374	0.000651133	0.0135367	0.359421	6.39551e-07	0.0368598	1.31197e-06	0.720426	0.000857174	0.426313	0.134533	0.682439	0.609113	0.492402	0.0300163	0.119334	0.0477037	0.00162234	1.65919e-09	0.00867075		3.15226e-05	0.000157013	2.78504e-07	3.57327e-05	0.000715687	0.200815	4.77955e-06	9.7995e-05	0.307561	0.206505
	miR-190b	Spearman's ρ	.513**	-0.093558	0.109255	0.142569	.404**	0.211886	.371**	.302*	0.0970142	.435**	0.146937	.332**	.357**	.315*	.334**	0.0554916	0.168587	.562**	.260*	.418**	0.00100806	.507**	0.0766609	0.187164	0.141465	-0.0269297	-0.0401306	0.0567876	0.133161	.400**	0.209533	.616**	0.222494	.499**	1	.552**	.627**	.435**	.537**	-0.0110887	0.199885	0.133833	.330**	0.015361
		p (two-sided)	1.70811e-05	0.465803	0.394006	0.264999	0.00101884	0.0954946	0.00279585	0.0162435	0.449413	0.000365141	0.250484	0.00781877	0.00404504	0.0118654	0.00742994	0.665768	0.186569	1.65136e-06	0.0393105	0.000660467	0.993744	2.18967e-05	0.550392	0.141878	0.268756	0.834053	0.754832	0.658439	0.298151	0.00115806	0.0993182	7.92744e-08	0.0796584	3.15226e-05		2.72505e-06	3.89818e-08	0.00037066	5.60365e-06	0.931264	0.116261	0.295698	0.00833471	0.904888
	miR-148b	Spearman's ρ	.471**	0.031682	0.199549	-0.0497312	.387**	0.0636041	.263*	.299*	0.144105	.696**	0.101815	.322**	0.237183	.336**	.392**	0.198061	0.154474	.759**	.261*	.504**	0.200797	.689**	0.0476671	0.0750768	0.102775	0.0349462	0.0122888	0.0545315	-0.0579397	0.219422	0.133209	.596**	.367**	.459**	.552**	1	.612**	.816**	.828**	-0.0993184	0.15481	0.110455	0.208573	0.193356
		p (two-sided)	9.70864e-05	0.805299	0.116889	0.698709	0.00174113	0.620435	0.0369311	0.0173813	0.259832	2.48479e-10	0.427189	0.00997083	0.0612496	0.0070322	0.0014674	0.119699	0.226733	5.60606e-13	0.0385652	2.59545e-05	0.11457	4.17525e-10	0.710652	0.558684	0.42282	0.785695	0.923847	0.671217	0.651952	0.0840136	0.297976	2.60577e-07	0.00313357	0.000157013	2.72505e-06		9.80785e-08	3.8983e-16	5.93447e-17	0.438667	0.225712	0.3888	0.100913	0.128925
	miR-1244	Spearman's ρ	.503**	-0.0998464	0.18606	0.112087	.673**	0.172859	.339**	.302*	0.226815	.418**	0.0210733	0.148474	.268*	0.204109	.397**	0.234639	.295*	.661**	.408**	.580**	-0.0144969	.383**	0.200797	.270*	0.0683564	0.217934	0.030818	0.178379	0.227391	0.184332	.317*	.541**	.382**	.595**	.627**	.612**	1	.508**	.518**	0.164026	.549**	.375**	0.136185	0.245392
		p (two-sided)	2.60616e-05	0.436224	0.144286	0.381786	1.52522e-09	0.175489	0.00659593	0.0160661	0.0738388	0.000652164	0.869784	0.24551	0.0334391	0.108589	0.00127395	0.0641654	0.0189699	3.63446e-09	0.000892166	6.41237e-07	0.910215	0.00195188	0.11457	0.0321153	0.594504	0.0861897	0.81051	0.161892	0.0730892	0.148117	0.0113713	4.65914e-06	0.00200802	2.78504e-07	3.89818e-08	9.80785e-08		2.14443e-05	1.34674e-05	0.198943	3.12346e-06	0.00247034	0.287213	0.0525641
	miR-324-5p	Spearman's ρ	.511**	-0.0734927	0.194028	-0.0955741	.328**	0.115735	.292*	.404**	.258*	.556**	0.158842	.262*	0.237279	.271*	.259*	0.102199	.249*	.713**	.472**	.513**	0.188748	.641**	0.0691724	.266*	0.191388	0.00172811	0.237759	-0.0248656	0.180252	0.174587	0.0949981	.527**	0.218606	.496**	.435**	.816**	.508**	1	.870**	-0.189036	0.189036	0.0215054	0.0550115	-0.0211694
		p (two-sided)	1.84733e-05	0.567035	0.127575	0.456203	0.00870188	0.366385	0.0201178	0.0010391	0.0412651	2.19144e-06	0.213707	0.0384176	0.0611417	0.0317362	0.0405277	0.425438	0.0486809	5.46707e-11	9.40548e-05	1.74475e-05	0.138475	1.5286e-08	0.5901	0.0352518	0.132941	0.989275	0.0606045	0.846613	0.157461	0.171146	0.458935	8.98096e-06	0.0852015	3.57327e-05	0.00037066	3.8983e-16	2.14443e-05		2.21418e-20	0.137863	0.137863	0.867138	0.66849	0.869196
	miR-130b	Spearman's ρ	.469**	0.000576037	0.193356	-0.078581	.278*	0.0255376	.313*	.258*	0.111559	.719**	0.16249	.290*	.271*	.313*	.313*	0.062212	0.197341	.693**	.407**	.457**	0.103207	.769**	0.0108007	0.143481	0.208669	-0.0108007	0.138009	-0.00700845	0.0275538	.314*	0.0967262	.574**	.297*	.415**	.537**	.828**	.518**	.870**	1	-0.199453	0.0880856	0.0250576	0.135561	0.0253456
		p (two-sided)	0.000107124	0.996425	0.128925	0.540422	0.0273606	0.842519	0.0125197	0.041187	0.384047	3.09759e-11	0.203239	0.0211004	0.0317362	0.0124771	0.012378	0.628121	0.121078	3.05803e-10	0.000922777	0.00016626	0.420863	1.87067e-13	0.933046	0.261923	0.100752	0.933046	0.280745	0.956525	0.830264	0.0122097	0.450767	8.52231e-07	0.0182296	0.000715687	5.60365e-06	5.93447e-17	1.34674e-05	2.21418e-20		0.117068	0.492402	0.845443	0.289448	0.843688
	miR-548a	Spearman's ρ	0.0186252	-0.062596	0.109975	0.0749328	.273*	0.0770449	0.152362	-0.0544835	-0.0377304	-0.0390745	-0.031346	-0.112951	0.0836694	0.11948	0.235407	.283*	0.132152	-0.131288	0.0841974	-0.151258	-0.0585637	-0.123944	0.130568	-0.125672	0.185628	.390**	-0.134841	.307*	0.00758449	0.0102727	.301*	0.115399	.468**	0.163354	-0.0110887	-0.0993184	0.164026	-0.189036	-0.199453	1	0.193548	.494**	-0.164507	.596**
		p (two-sided)	0.884802	0.625996	0.390878	0.559441	0.0304995	0.548391	0.233225	0.671489	0.769076	0.76109	0.807325	0.378104	0.514433	0.350977	0.0632736	0.024803	0.301857	0.305057	0.511773	0.23667	0.648448	0.333138	0.30774	0.326389	0.145237	0.00156914	0.292042	0.0142855	0.952956	0.936312	0.0166216	0.367787	0.000110337	0.200815	0.931264	0.438667	0.198943	0.137863	0.117068		0.128538	3.82568e-05	0.197613	2.60577e-07
	miR-659	Spearman's ρ	.342**	-0.185052	0.149962	-0.123128	.755**	.264*	0.135561	0.168011	0.113815	-0.0287058	-0.157594	-0.0853975	0.0999424	0.199453	0.112855	.269*	0.0725806	.326**	.304*	.505**	-0.179579	-0.0891897	0.174875	0.192348	-0.126344	0.0428187	-0.0256336	0.204637	0.216446	-0.236367	0.176027	0.186972	0.0272657	.541**	0.199885	0.15481	.549**	0.189036	0.0880856	0.193548	1	.664**	0.103159	0.18222
		p (two-sided)	0.00609168	0.146512	0.240757	0.336355	8.40461e-13	0.0364346	0.289448	0.188101	0.374443	0.82328	0.217374	0.505753	0.435781	0.117068	0.378512	0.032982	0.571869	0.00910466	0.0154412	2.40442e-05	0.159041	0.486972	0.17043	0.13097	0.323787	0.738976	0.841935	0.107659	0.0884099	0.062173	0.167587	0.142294	0.832013	4.77955e-06	0.116261	0.225712	3.12346e-06	0.137863	0.492402	0.128538		3.00419e-09	0.42108	0.152901
	miR-638	Spearman's ρ	.392**	-0.0564996	0.159034	-0.120488	.692**	0.16393	0.147897	-0.0448829	0.00427227	0.112615	-0.239631	-0.118328	0.153226	.297*	0.161002	.341**	0.18366	0.237663	0.236127	0.207325	-0.142185	-0.00115207	0.12716	-0.00926459	0.046611	.251*	-0.127352	.340**	0.0539075	-0.165179	0.199165	.278*	.265*	.471**	0.133833	0.110455	.375**	0.0215054	0.0250576	.494**	.664**	1	-0.0285138	.460**
		p (two-sided)	0.00148683	0.660065	0.213147	0.346898	3.37646e-10	0.199209	0.247367	0.726872	0.97349	0.379534	0.0585458	0.355674	0.230554	0.018151	0.207464	0.00620672	0.149627	0.0607116	0.0624467	0.103015	0.266302	0.99285	0.320647	0.942551	0.71679	0.0469161	0.31991	0.00636308	0.674767	0.195763	0.117609	0.0274997	0.0359436	9.7995e-05	0.295698	0.3888	0.00247034	0.867138	0.845443	3.82568e-05	3.00419e-09		0.824443	0.00014985
	miR-622	Spearman's ρ	0.22379	-0.00513633	0.047331	0.143193	0.0567396	0.116215	0.188268	0.116935	0.015553	0.101815	0.015793	0.147561	-0.0445949	.344**	-0.0349942	-0.108391	-0.0648041	0.135993	0.116023	0.207949	-0.00864055	0.1238	0.09303	0.0609159	-0.175067	-.257*	-0.0415227	-0.0419067	-0.114439	0.19302	0.0421467	0.132488	-0.204205	0.130616	.330**	0.208573	0.136185	0.0550115	0.135561	-0.164507	0.103159	-0.0285138	1	-0.047427
		p (two-sided)	0.0778756	0.968131	0.712603	0.262892	0.65871	0.364386	0.1395	0.361402	0.903704	0.427189	0.902225	0.248455	0.728557	0.00583782	0.785407	0.397779	0.613841	0.2879	0.365185	0.10196	0.946414	0.333704	0.468335	0.635312	0.169954	0.0419342	0.746608	0.744344	0.371812	0.129604	0.74293	0.300618	0.10842	0.307561	0.00833471	0.100913	0.287213	0.66849	0.289448	0.197613	0.42108	0.824443		0.712046
	miR-548c	Spearman's ρ	0.161674	-0.0346102	.253*	-0.0140169	.275*	0.0880376	0.0958141	-0.11996	-0.0242416	0.211502	-4.80031e-05	0.0290419	-0.000384025	0.0979263	.331**	0.22403	0.178763	0.0752208	0.047379	-0.0137289	-0.047619	0.0641801	0.230511	-0.114967	0.0991263	.351**	-0.192828	0.228927	-0.0748368	0.0568836	.269*	0.132104	.471**	0.161338	0.015361	0.193356	0.245392	-0.0211694	0.0253456	.596**	0.18222	.460**	-0.047427	1
		p (two-sided)	0.205549	0.787707	0.0457123	0.913176	0.0292741	0.492639	0.455068	0.349031	0.850417	0.0961109	0.999702	0.821245	0.997617	0.445142	0.00804884	0.0775489	0.160976	0.557928	0.712324	0.914954	0.710931	0.617266	0.0691335	0.369595	0.439557	0.00484417	0.129993	0.0711198	0.559946	0.657898	0.032982	0.302034	9.81776e-05	0.206505	0.904888	0.128925	0.0525641	0.869196	0.843688	2.60577e-07	0.152901	0.00014985	0.712046
**. Statistically signifficant p<0.01 (two-sided).
*. Statistically signifficant p<0.05 (two-sided).

## Sheet: Intermediate monocytes
Correlations
			miR-103	miR-140	miR-125b	miR-376c	miR-155	miR-1249	miR-374	miR-384	miR-148a	miR-361	miR-1244	miR-22-5p	miR-128a	miR-320	miR-484	miR-367	miR-150	miR-337-5p	miR-494	miR-195	miR-365	miR-483-5p	miR-16	miR-222	miR-146b	miR-133a	miR-662	miR-505	miR-19a	miR-302b-5p	miR-639	miR-488	miR-93-3p	miR-19b	miR-551b	miR-532	miR-1300	miR-30d-3p	miR-22	miR-1247	miR-139-5p	miR-1227	miR-661	miR-888	miR-337-5p	miR-489	miR-432
Spearman's ρ	miR-103	Spearman's ρ	1	.797**	0.246832	0.00907258	.259*	-0.0144489	.653**	-0.204829	.367**	.493**	.462**	.276*	.370**	.596**	.524**	-0.0664843	.414**	-0.110983	.301*	.648**	.709**	-0.132921	.753**	.540**	.686**	0.224558	-0.160666	.474**	.716**	0.0169931	-0.128792	-0.0357143	.434**	.599**	0.0368184	.754**	-0.0292819	0.205069	.307*	0.031346	.283*	0.183324	0.0805492	-0.046899	-0.110983	0.078725	0.0258257
		p (two-sided)		5.52071e-15	0.0511492	0.943739	0.0400295	0.910511	6.76726e-09	0.107322	0.00305416	4.12724e-05	0.000140172	0.028261	0.00279968	2.53433e-07	1.06688e-05	0.604662	0.000750091	0.386523	0.0163508	9.19684e-09	7.69807e-11	0.299031	1.07237e-12	4.84645e-06	5.50168e-10	0.0768341	0.208427	8.82516e-05	4.0338e-11	0.894836	0.314424	0.7811	0.000373758	2.14896e-07	0.774509	9.67051e-13	0.819792	0.106902	0.0144137	0.807325	0.0247264	0.150386	0.530294	0.715114	0.386523	0.539677	0.840766
	miR-140	Spearman's ρ	.797**	1	0.226094	-0.0187212	.300*	-0.0585157	.661**	-0.0984063	.314*	.472**	.398**	.271*	.435**	.434**	.522**	-0.18246	.378**	-0.19182	.356**	.653**	.619**	-0.223646	.718**	.589**	.809**	.372**	-0.179051	.425**	.722**	-0.120488	-0.0649482	-0.180156	.270*	.637**	-0.129128	.695**	0.0751728	0.150298	.380**	-0.0803571	.281*	0.124712	0.0644681	-0.0227535	-0.19182	0.152794	-0.0192972
		p (two-sided)	5.52071e-15		0.0747845	0.884212	0.0169886	0.648718	3.73787e-09	0.442903	0.0121818	9.38793e-05	0.00122566	0.031392	0.000363925	0.000378765	1.12202e-05	0.152352	0.00223161	0.132051	0.00416318	6.56326e-09	6.46843e-08	0.0780721	3.44405e-11	3.91153e-07	1.07557e-15	0.00267966	0.160291	0.000513018	2.50176e-11	0.346898	0.613052	0.157686	0.0320835	1.99885e-08	0.313152	2.56578e-10	0.55818	0.239693	0.00213663	0.531278	0.025711	0.330127	0.615685	0.859503	0.132051	0.231887	0.880675
	miR-125b	Spearman's ρ	0.246832	0.226094	1	-0.00715246	0.165035	-0.173867	.324**	0.00139209	.370**	0.209869	0.0492992	0.00960061	0.175739	.323**	0.204781	-0.0887097	0.245248	0.0360023	0.233295	0.224846	0.244192	-0.0680684	0.244864	.482**	.260*	0.105559	-0.0554916	0.140793	0.133401	0.0535714	-0.103927	-0.0107047	.354**	.311*	-0.078149	0.0534274	-0.0261617	0.135705	.326**	-0.0638921	0.0211214	0.0182412	-0.077525	0.0285618	0.0360023	0.199069	-0.0604359
		p (two-sided)	0.0511492	0.0747845		0.955633	0.196158	0.172946	0.00959122	0.991361	0.00281886	0.0987648	0.701203	0.940471	0.168295	0.00975071	0.107406	0.489329	0.0527073	0.779379	0.0657503	0.0764465	0.0537673	0.596062	0.0530908	6.31384e-05	0.0399914	0.410296	0.665768	0.27106	0.297273	0.676682	0.417611	0.933639	0.00446039	0.0131158	0.542657	0.677503	0.838722	0.288932	0.00905075	0.61885	0.86949	0.887161	0.545895	0.824152	0.779379	0.11779	0.637984
	miR-376c	Spearman's ρ	0.00907258	-0.0187212	-0.00715246	1	-0.0222734	0.222878	0.100326	.303*	-0.0694124	0.00945661	-0.00926459	-0.0495872	-0.111079	0.178811	0.1226	.669**	-0.0062884	.608**	-0.0489151	-0.063124	-0.0607719	.283*	-0.00206413	-0.0480511	-0.0353783	0.214142	0.18822	0.062308	-0.0217934	.554**	.404**	.552**	-0.0658122	0.156154	.339**	-0.143673	0.114055	0.15313	.335**	.509**	0.0366743	.337**	0.243136	.429**	.608**	.339**	.490**
		p (two-sided)	0.943739	0.884212	0.955633		0.862438	0.0791268	0.434011	0.0159079	0.588808	0.941362	0.942551	0.69954	0.38611	0.160861	0.338448	2.10845e-09	0.960988	1.25323e-07	0.703422	0.623081	0.636113	0.0245739	0.98719	0.708425	0.783109	0.0919361	0.139602	0.627589	0.865375	2.41523e-06	0.0010173	2.75138e-06	0.608326	0.221659	0.00657963	0.261278	0.37343	0.23085	0.00729523	2.0351e-05	0.775368	0.00698061	0.0548447	0.000445263	1.25323e-07	0.00655525	4.57562e-05
	miR-155	Spearman's ρ	.259*	.300*	0.165035	-0.0222734	1	0.0548195	.303*	-.273*	0.112039	0.170171	.296*	.299*	.288*	.384**	.269*	-0.0915419	.282*	-0.0791571	0.0927419	0.22403	0.0964862	-0.202861	.385**	0.244288	.341**	-0.0950941	-0.242368	0.172907	0.0680204	-0.0748848	-0.092982	-0.0966782	0.142425	.348**	0.0320661	.269*	0.0842934	-0.00110407	0.207277	-0.170843	-0.109975	-0.0452189	0.132921	0.0606279	-0.0791571	0.0976863	-0.015361
		p (two-sided)	0.0400295	0.0169886	0.196158	0.862438		0.66958	0.0157336	0.0304691	0.381992	0.182404	0.0186266	0.0172496	0.0221236	0.00191615	0.0331121	0.475511	0.0252665	0.537448	0.469719	0.0775489	0.451896	0.110814	0.00182285	0.0536702	0.00619899	0.458479	0.0556391	0.175368	0.596322	0.559693	0.468566	0.450993	0.265487	0.00519035	0.802987	0.0328848	0.51129	0.993148	0.103097	0.180657	0.390878	0.724908	0.299031	0.636915	0.537448	0.446264	0.904888
	miR-1249	Spearman's ρ	-0.0144489	-0.0585157	-0.173867	0.222878	0.0548195	1	-0.143529	0.116455	-.277*	0.128504	0.201181	0.00523233	-0.0897657	0.163834	0.151306	0.127976	0.0667723	0.101767	0.0868856	-0.114727	-0.174059	.278*	-0.0904858	-0.100998	-0.0402266	-0.0869816	0.151402	0.0441148	-0.167963	0.0991743	0.108103	0.0117127	-0.0846774	-0.146121	0.0858775	-0.140985	.253*	0.167195	0.046611	0.0649962	-0.0386425	-0.0061924	0.234207	0.152506	0.101767	0.0332181	0.113527
		p (two-sided)	0.910511	0.648718	0.172946	0.0791268	0.66958		0.261762	0.36339	0.0278077	0.315516	0.113864	0.967536	0.484152	0.199476	0.236519	0.317525	0.603094	0.427408	0.498339	0.370602	0.172465	0.0274997	0.480639	0.430922	0.754264	0.497863	0.236218	0.731368	0.188229	0.439334	0.399042	0.927406	0.50936	0.253153	0.503355	0.2704	0.0453308	0.190286	0.71679	0.612789	0.763654	0.961583	0.0646714	0.232779	0.427408	0.796058	0.375661
	miR-374	Spearman's ρ	.653**	.661**	.324**	0.100326	.303*	-0.143529	1	-0.047043	.312*	.266*	0.236319	0.195036	.443**	.519**	.285*	-0.0351382	0.234639	-0.0061924	0.122504	.663**	.643**	-0.160426	.714**	.389**	.522**	0.232959	-0.243904	.439**	.547**	0.130856	-0.0195853	0.0990303	.330**	.777**	0.0123848	.547**	0.0353783	0.117512	.369**	0.138633	.265*	.256*	0.0251056	0.179531	-0.0061924	.256*	0.0675883
		p (two-sided)	6.76726e-09	3.73787e-09	0.00959122	0.434011	0.0157336	0.261762		0.714277	0.0128949	0.0351148	0.0622276	0.12557	0.000279685	1.28973e-05	0.023504	0.784545	0.0641654	0.961583	0.338829	3.20176e-09	1.29383e-08	0.209116	4.8646e-11	0.00164598	1.13188e-05	0.0661514	0.0540594	0.000313931	3.54218e-06	0.306665	0.878907	0.440002	0.00819562	7.28889e-14	0.923253	3.56738e-06	0.783109	0.359025	0.00294439	0.278555	0.0360833	0.0431368	0.84515	0.159155	0.961583	0.042532	0.598662
	miR-384	Spearman's ρ	-0.204829	-0.0984063	0.00139209	.303*	-.273*	0.116455	-0.047043	1	-0.00230415	-0.0291859	-0.156346	-0.105223	-0.0793011	-0.0660522	-0.0250576	.329**	-0.0962942	0.164171	0.0978303	-0.0726767	0.0193452	.355**	-0.18006	-0.0491551	-0.158602	-0.00556836	0.165035	0.0014881	0.0596198	0.18102	.422**	0.239871	0.122936	-0.046803	0.183612	-0.145257	0.21371	0.101815	0.223646	0.0891417	0.0796371	0.0346102	0.162442	.337**	0.164171	.298*	0.0794451
		p (two-sided)	0.107322	0.442903	0.991361	0.0159079	0.0304691	0.36339	0.714277		0.985701	0.820373	0.221085	0.411796	0.536705	0.607016	0.845443	0.00855745	0.452801	0.198543	0.445591	0.571359	0.88038	0.00435742	0.157912	0.702035	0.214409	0.965452	0.196158	0.990765	0.642537	0.15567	0.000563257	0.058286	0.337115	0.715673	0.149735	0.256001	0.0926093	0.427189	0.0780721	0.487208	0.534976	0.787707	0.203375	0.00687841	0.198543	0.0176284	0.535964
	miR-148a	Spearman's ρ	.367**	.314*	.370**	-0.0694124	0.112039	-.277*	.312*	-0.00230415	1	.266*	.265*	.269*	.361**	.284*	0.232239	-0.140073	0.217934	0.0106087	0.132008	.349**	.352**	-0.107959	.254*	.458**	.300*	0.107767	-0.0854455	.295*	.275*	-0.0575077	-0.0320661	-0.115015	.325**	.260*	-0.0647561	.298*	-0.214286	0.0748368	0.200989	0.0296659	0.238815	.334**	0.0741167	-0.00484831	0.0106087	0.231039	0.0637481
		p (two-sided)	0.00305416	0.0121818	0.00281886	0.588808	0.381992	0.0278077	0.0128949	0.985701		0.0352175	0.0356656	0.0331446	0.00360641	0.0240962	0.0670176	0.273543	0.0861897	0.934233	0.302389	0.00501463	0.00471515	0.399674	0.0442433	0.000163318	0.0170814	0.400518	0.505513	0.018909	0.0289525	0.654382	0.802987	0.369394	0.00931207	0.0398773	0.614105	0.017705	0.0917125	0.559946	0.114217	0.817469	0.0594361	0.00746623	0.563738	0.969917	0.934233	0.0684814	0.619642
	miR-361	Spearman's ρ	.493**	.472**	0.209869	0.00945661	0.170171	0.128504	.266*	-0.0291859	.266*	1	0.239871	0.198397	.391**	.318*	.376**	-0.16177	.296*	9.60061e-05	.290*	.297*	.314*	0.0751728	.375**	.480**	.420**	0.102391	0.135033	.367**	.467**	0.0144489	0.0100326	-0.122408	.277*	.316*	-0.170459	.387**	-0.00729647	0.00888057	.277*	-0.0123368	0.061924	0.09375	0.101046	-0.0253456	9.60061e-05	0.102103	0.0948061
		p (two-sided)	4.12724e-05	9.38793e-05	0.0987648	0.941362	0.182404	0.315516	0.0351148	0.820373	0.0352175		0.058286	0.11906	0.00154201	0.0112019	0.00239943	0.205276	0.0183677	0.999404	0.0212793	0.0182492	0.0121957	0.55818	0.00242623	6.87081e-05	0.000616942	0.424564	0.291349	0.00307488	0.000115961	0.910511	0.937797	0.33921	0.0279204	0.0116629	0.181653	0.00171134	0.95474	0.944928	0.027977	0.92355	0.629716	0.464884	0.430702	0.843688	0.999404	0.425875	0.459847
	miR-1244	Spearman's ρ	.462**	.398**	0.0492992	-0.00926459	.296*	0.201181	0.236319	-0.156346	.265*	0.239871	1	.508**	0.0920699	.562**	.477**	-0.0436828	.344**	-0.093126	.284*	0.197197	.289*	-0.0575557	.348**	0.0757969	.277*	.250*	-0.0167051	0.110743	0.199117	0.0711886	0.229695	0.0251536	0.0272177	0.215918	0.0876536	.392**	0.0844854	0.185148	-0.0215054	0.0883737	0.154138	0.200557	.269*	0.0923579	-0.093126	-0.078053	0.0801651
		p (two-sided)	0.000140172	0.00122566	0.701203	0.942551	0.0186266	0.113864	0.0622276	0.221085	0.0356656	0.058286		2.09129e-05	0.472958	1.65958e-06	7.79169e-05	0.733901	0.0058305	0.467874	0.0240713	0.121355	0.0216182	0.654112	0.00519696	0.554908	0.0279204	0.0480128	0.896609	0.387557	0.117699	0.579284	0.0701511	0.844858	0.832304	0.0892085	0.494535	0.00149772	0.510325	0.146299	0.867138	0.490982	0.227757	0.115014	0.0327877	0.471568	0.467874	0.543155	0.532263
	miR-22-5p	Spearman's ρ	.276*	.271*	0.00960061	-0.0495872	.299*	0.00523233	0.195036	-0.105223	.269*	0.198397	.508**	1	0.0769969	.289*	.285*	-0.0274578	.299*	-0.0658122	0.237855	0.175355	0.0966782	0.00542435	0.169931	0.125432	0.19014	-0.0436348	-0.0169451	0.176891	0.200365	0.0132008	0.0364343	-0.0743568	0.0721006	0.138441	-0.0167531	0.194268	0.0606759	0.222734	0.0640361	0.0145929	0.176075	.266*	.312*	0.0488671	-0.0658122	-0.201325	0.0605799
		p (two-sided)	0.028261	0.031392	0.940471	0.69954	0.0172496	0.967536	0.12557	0.411796	0.0331446	0.11906	2.09129e-05		0.548641	0.0215274	0.0236509	0.830847	0.0172683	0.608326	0.0604975	0.169241	0.450993	0.966345	0.18303	0.327321	0.135536	0.734183	0.895132	0.165478	0.115369	0.918213	0.7768	0.562473	0.574421	0.279227	0.896313	0.127096	0.636647	0.0793258	0.618058	0.909623	0.16747	0.0353205	0.0126773	0.7037	0.608326	0.1136	0.637182
	miR-128a	Spearman's ρ	.370**	.435**	0.175739	-0.111079	.288*	-0.0897657	.443**	-0.0793011	.361**	.391**	0.0920699	0.0769969	1	0.157834	0.077573	-0.22547	0.0235215	-0.0928859	.283*	.466**	.367**	-0.0859735	.340**	.393**	.303*	0.015169	-0.0516993	.380**	.288*	-0.140313	-0.0518913	-0.188268	.282*	.376**	-0.133449	.382**	0.00427227	0.22091	.266*	0.00120008	0.0264497	0.136665	.277*	0.197773	-0.0928859	0.0982623	0.0273618
		p (two-sided)	0.00279968	0.000363925	0.168295	0.38611	0.0221236	0.484152	0.000279685	0.536705	0.00360641	0.00154201	0.472958	0.548641		0.216665	0.545645	0.0756119	0.854811	0.469027	0.0247775	0.000120736	0.00310411	0.502876	0.00632367	0.00143975	0.0157163	0.906071	0.687388	0.00210084	0.0219156	0.272714	0.686287	0.1395	0.0249567	0.00237951	0.297098	0.00199103	0.97349	0.0818812	0.0349441	0.992552	0.836971	0.285502	0.0277515	0.120249	0.469027	0.443574	0.83143
	miR-320	Spearman's ρ	.596**	.434**	.323**	0.178811	.384**	0.163834	.519**	-0.0660522	.284*	.318*	.562**	.289*	0.157834	1	.766**	0.158458	.597**	0.13124	.300*	.253*	.352**	0.0859735	.478**	.414**	.537**	.351**	-0.0227055	.303*	.321*	.298*	0.149386	.285*	.277*	.503**	.266*	.453**	0.109543	0.234399	0.233679	0.228927	.360**	.354**	.337**	0.219278	0.13124	0.241503	0.243568
		p (two-sided)	2.53433e-07	0.000378765	0.00975071	0.160861	0.00191615	0.199476	1.28973e-05	0.607016	0.0240962	0.0112019	1.65958e-06	0.0215274	0.216665		2.53538e-13	0.214831	2.39026e-07	0.305235	0.0168962	0.0452463	0.0046428	0.502876	7.50129e-05	0.000737306	5.56522e-06	0.00477621	0.859797	0.0156471	0.0102072	0.017514	0.24259	0.0236509	0.0280619	2.61154e-05	0.0349441	0.000189588	0.392753	0.0644461	0.0652943	0.0711198	0.00373779	0.00439151	0.00688687	0.0842223	0.305235	0.0565441	0.0544018
	miR-484	Spearman's ρ	.524**	.522**	0.204781	0.1226	.269*	0.151306	.285*	-0.0250576	0.232239	.376**	.477**	.285*	0.077573	.766**	1	-0.032018	.716**	0.0371544	.290*	0.200413	.282*	0.12788	.416**	.503**	.630**	.348**	0.101911	0.177755	.403**	0.0723406	0.0343222	0.0352823	0.192492	.362**	0.113191	.487**	0.0756048	0.138921	0.224702	0.160282	.428**	.365**	.317*	0.0598118	0.0371544	0.137817	0.128984
		p (two-sided)	1.06688e-05	1.12202e-05	0.107406	0.338448	0.0331121	0.236519	0.023504	0.845443	0.0670176	0.00239943	7.79169e-05	0.0236509	0.545645	2.53538e-13		0.803276	4.15914e-11	0.772506	0.0210115	0.11528	0.024931	0.317892	0.000696833	2.63313e-05	3.06704e-08	0.0052102	0.426751	0.163389	0.00106776	0.573144	0.789433	0.783684	0.130677	0.00359684	0.377085	5.10856e-05	0.555914	0.277547	0.0766401	0.209531	0.00046309	0.00330235	0.0114634	0.641464	0.772506	0.281421	0.313697
	miR-367	Spearman's ρ	-0.0664843	-0.18246	-0.0887097	.669**	-0.0915419	0.127976	-0.0351382	.329**	-0.140073	-0.16177	-0.0436828	-0.0274578	-0.22547	0.158458	-0.032018	1	-0.101623	.396**	0.00792051	-0.185676	-0.0793491	.258*	-0.105463	-0.184428	-0.190908	0.12284	0.189852	0.108295	-0.0868376	.574**	.399**	.597**	-0.0790611	0.016033	.378**	-0.178955	0.236511	0.15433	0.195084	.269*	0.0904378	0.0442588	0.168347	.275*	.396**	.311*	.365**
		p (two-sided)	0.604662	0.152352	0.489329	2.10845e-09	0.475511	0.317525	0.784545	0.00855745	0.273543	0.205276	0.733901	0.830847	0.0756119	0.214831	0.803276		0.428066	0.00132198	0.950874	0.145131	0.536458	0.0413042	0.410724	0.147902	0.133934	0.337496	0.13614	0.3982	0.498578	8.56652e-07	0.00119321	2.44421e-07	0.537943	0.900747	0.002241	0.160519	0.0620092	0.227172	0.125475	0.0331121	0.480873	0.730525	0.187206	0.0291275	0.00132198	0.0130418	0.00329792
	miR-150	Spearman's ρ	.414**	.378**	0.245248	-0.0062884	.282*	0.0667723	0.234639	-0.0962942	0.217934	.296*	.344**	.299*	0.0235215	.597**	.716**	-0.101623	1	0.0077765	0.175163	.262*	0.247552	0.046755	.411**	.473**	.658**	.277*	0.0278898	0.228063	.291*	0.0192492	-0.143049	-0.18486	0.203677	.261*	-0.0925499	.313*	-0.0336022	0.0728207	0.137865	-0.0267377	.269*	0.18246	0.112807	-0.0845814	0.0077765	0.0715246	-0.046467
		p (two-sided)	0.000750091	0.00223161	0.0527073	0.960988	0.0252665	0.603094	0.0641654	0.452801	0.0861897	0.0183677	0.0058305	0.0172683	0.854811	2.39026e-07	4.15914e-11	0.428066		0.951766	0.169716	0.0378681	0.0504535	0.715952	0.00082854	9.17957e-05	4.6717e-09	0.0278359	0.828226	0.0722223	0.0206807	0.880969	0.263377	0.146938	0.109356	0.0386763	0.470643	0.0124913	0.793752	0.570595	0.281252	0.83522	0.0333079	0.152352	0.378716	0.509842	0.951766	0.57749	0.717629
	miR-337-5p	Spearman's ρ	-0.110983	-0.19182	0.0360023	.608**	-0.0791571	0.101767	-0.0061924	0.164171	0.0106087	9.60061e-05	-0.093126	-0.0658122	-0.0928859	0.13124	0.0371544	.396**	0.0077765	1	-0.0915419	-0.141993	-0.136137	0.232623	-0.117752	-0.129944	-0.0738287	0.0570757	0.200605	-0.046947	-0.173339	.500**	0.213134	.439**	0.0404666	-0.00062404	.356**	-0.242992	0.0249616	0.16009	0.1178	.670**	0.016273	.416**	.251*	.304*	1.000**	.272*	.627**
		p (two-sided)	0.386523	0.132051	0.779379	1.25323e-07	0.537448	0.427408	0.961583	0.198543	0.934233	0.999404	0.467874	0.608326	0.469027	0.305235	0.772506	0.00132198	0.951766		0.475511	0.266955	0.287385	0.0665545	0.358038	0.310078	0.565259	0.656815	0.114925	0.714835	0.174275	2.95341e-05	0.093513	0.000320899	0.752845	0.996127	0.00418498	0.0549929	0.846028	0.210084	0.35784	1.93316e-09	0.899269	0.000695738	0.0473961	0.015561		0.0310818	3.9467e-08
	miR-494	Spearman's ρ	.301*	.356**	0.233295	-0.0489151	0.0927419	0.0868856	0.122504	0.0978303	0.132008	.290*	.284*	0.237855	.283*	.300*	.290*	0.00792051	0.175163	-0.0915419	1	.262*	0.241023	0.0978303	0.198733	.273*	.279*	0.142041	0.0848694	0.21155	0.188028	-0.149578	-0.0247216	-0.12116	0.170315	0.144201	-0.0815092	0.22451	0.153754	.286*	0.201469	-0.177563	0.150634	0.113239	0.22211	0.0964862	-0.0915419	0.06322	-0.0648041
		p (two-sided)	0.0163508	0.00416318	0.0657503	0.703422	0.469719	0.498339	0.338829	0.445591	0.302389	0.0212793	0.0240713	0.0604975	0.0247775	0.0168962	0.0210115	0.950874	0.169716	0.475511		0.037941	0.057052	0.445591	0.118424	0.0301365	0.0269195	0.266792	0.508397	0.0960337	0.140014	0.241978	0.84749	0.344195	0.182028	0.259511	0.525388	0.0768989	0.228932	0.022996	0.113337	0.163852	0.238632	0.376881	0.0801928	0.451896	0.475511	0.622551	0.613841
	miR-195	Spearman's ρ	.648**	.653**	0.224846	-0.063124	0.22403	-0.114727	.663**	-0.0726767	.349**	.297*	0.197197	0.175355	.466**	.253*	0.200413	-0.185676	.262*	-0.141993	.262*	1	.703**	-0.207805	.729**	.588**	.546**	.257*	-0.199165	.382**	.686**	-0.162634	-0.154618	-0.215246	.389**	.573**	-0.162634	.576**	0.0277938	0.108631	.275*	-0.130952	0.18822	0.0977823	0.046755	0.0854455	-0.141993	0.15961	-0.0403706
		p (two-sided)	9.19684e-09	6.56326e-09	0.0764465	0.623081	0.0775489	0.370602	3.20176e-09	0.571359	0.00501463	0.0182492	0.121355	0.169241	0.000120736	0.0452463	0.11528	0.145131	0.0378681	0.266955	0.037941		1.29448e-10	0.102202	1.2655e-11	4.08476e-07	3.644e-06	0.0420929	0.117609	0.00197977	5.45937e-10	0.202834	0.226295	0.090233	0.00165074	9.35171e-07	0.202834	7.88441e-07	0.828808	0.396729	0.0290691	0.306307	0.139602	0.445815	0.715952	0.505513	0.266955	0.211473	0.753412
	miR-365	Spearman's ρ	.709**	.619**	0.244192	-0.0607719	0.0964862	-0.174059	.643**	0.0193452	.352**	.314*	.289*	0.0966782	.367**	.352**	.282*	-0.0793491	0.247552	-0.136137	0.241023	.703**	1	-0.203773	.734**	.519**	.502**	0.22331	-0.101094	.427**	.696**	-0.0878936	-0.0597638	-0.0300019	.342**	.637**	-0.0557316	.695**	0.00979263	0.107431	.375**	-0.00662442	.371**	0.136185	-0.0529954	0.0047523	-0.136137	0.105223	-0.0381144
		p (two-sided)	7.69807e-11	6.46843e-08	0.0537673	0.636113	0.451896	0.172465	1.29383e-08	0.88038	0.00471515	0.0121957	0.0216182	0.450993	0.00310411	0.0046428	0.024931	0.536458	0.0504535	0.287385	0.057052	1.29448e-10		0.109185	7.86276e-12	1.30659e-05	2.76057e-05	0.0785322	0.430482	0.00048	2.48479e-10	0.493349	0.641732	0.815438	0.00611454	1.96703e-08	0.664408	2.58641e-10	0.939282	0.401997	0.00242623	0.958905	0.00278442	0.287213	0.67997	0.970513	0.287385	0.411796	0.766792
	miR-483-5p	Spearman's ρ	-0.132921	-0.223646	-0.0680684	.283*	-0.202861	.278*	-0.160426	.355**	-0.107959	0.0751728	-0.0575557	0.00542435	-0.0859735	0.0859735	0.12788	.258*	0.046755	0.232623	0.0978303	-0.207805	-0.203773	1	-.305*	-0.116311	-0.228783	0.0894777	.570**	-0.0197293	-0.147801	.338**	.409**	0.154906	-0.0577477	-0.222926	.262*	-0.179339	0.0139209	-0.137817	0.0395065	0.177899	-0.0354263	0.164747	.377**	0.230127	0.232623	0.127016	0.216926
		p (two-sided)	0.299031	0.0780721	0.596062	0.0245739	0.110814	0.0274997	0.209116	0.00435742	0.399674	0.55818	0.654112	0.966345	0.502876	0.502876	0.317892	0.0413042	0.715952	0.0665545	0.445591	0.102202	0.109185		0.0149364	0.363988	0.0713026	0.485561	1.07664e-06	0.878024	0.247678	0.00677752	0.000875858	0.225421	0.653031	0.0790606	0.0382704	0.159608	0.913769	0.281421	0.758528	0.163042	0.782822	0.196951	0.0023271	0.0696109	0.0665545	0.321199	0.0876889
	miR-16	Spearman's ρ	.753**	.718**	0.244864	-0.00206413	.385**	-0.0904858	.714**	-0.18006	.254*	.375**	.348**	0.169931	.340**	.478**	.416**	-0.105463	.411**	-0.117752	0.198733	.729**	.734**	-.305*	1	.558**	.742**	.283*	-.368**	.482**	.663**	-0.00590438	-0.131288	-0.062932	.415**	.793**	-0.0227535	.675**	0.104023	0.109303	.445**	-0.0507873	.261*	0.102199	-0.0557796	-0.0594278	-0.117752	0.188508	0.0377784
		p (two-sided)	1.07237e-12	3.44405e-11	0.0530908	0.98719	0.00182285	0.480639	4.8646e-11	0.157912	0.0442433	0.00242623	0.00519696	0.18303	0.00632367	7.50129e-05	0.000696833	0.410724	0.00082854	0.358038	0.118424	1.2655e-11	7.86276e-12	0.0149364		2.01663e-06	3.49126e-12	0.0244727	0.0029968	6.43663e-05	3.23586e-09	0.963369	0.305057	0.62414	0.000714566	9.74146e-15	0.859503	1.35082e-09	0.417179	0.393797	0.000258048	0.692626	0.0384913	0.425438	0.664137	0.64361	0.358038	0.138987	0.768791
	miR-222	Spearman's ρ	.540**	.589**	.482**	-0.0480511	0.244288	-0.100998	.389**	-0.0491551	.458**	.480**	0.0757969	0.125432	.393**	.414**	.503**	-0.184428	.473**	-0.129944	.273*	.588**	.519**	-0.116311	.558**	1	.684**	0.238047	-0.0749808	.371**	.595**	-0.201421	-0.180492	-0.211262	.348**	.530**	-0.128552	.492**	-0.0333141	0.115015	.349**	-0.078197	.333**	0.0955261	0.178427	0.0189612	-0.129944	0.12548	-0.0769489
		p (two-sided)	4.84645e-06	3.91153e-07	6.31384e-05	0.708425	0.0536702	0.430922	0.00164598	0.702035	0.000163318	6.87081e-05	0.554908	0.327321	0.00143975	0.000737306	2.63313e-05	0.147902	9.17957e-05	0.310078	0.0301365	4.08476e-07	1.30659e-05	0.363988	2.01663e-06		6.29456e-10	0.060284	0.559189	0.00273159	2.66428e-07	0.113425	0.1569	0.0964976	0.00523012	7.8205e-06	0.315334	4.25222e-05	0.795481	0.369394	0.00507909	0.542409	0.00764072	0.456431	0.161777	0.882738	0.310078	0.327134	0.548891
	miR-146b	Spearman's ρ	.686**	.809**	.260*	-0.0353783	.341**	-0.0402266	.522**	-0.158602	.300*	.420**	.277*	0.19014	.303*	.537**	.630**	-0.190908	.658**	-0.0738287	.279*	.546**	.502**	-0.228783	.742**	.684**	1	.338**	-0.232143	.458**	.577**	-0.0988863	-0.121688	-0.190188	.381**	.636**	-0.0795891	.613**	0.0453629	0.0980703	.389**	-0.00537634	.289*	0.196525	0.0959101	-0.162682	-0.0738287	0.1899	0.0129608
		p (two-sided)	5.50168e-10	1.07557e-15	0.0399914	0.783109	0.00619899	0.754264	1.13188e-05	0.214409	0.0170814	0.000616942	0.0279204	0.135536	0.0157163	5.56522e-06	3.06704e-08	0.133934	4.6717e-09	0.565259	0.0269195	3.644e-06	2.76057e-05	0.0713026	3.49126e-12	6.29456e-10		0.00681101	0.0671338	0.000160424	7.3489e-07	0.440671	0.342081	0.135435	0.00203662	2.11074e-08	0.535223	9.0048e-08	0.724067	0.44447	0.00164836	0.966643	0.0216866	0.122655	0.454614	0.202699	0.565259	0.136039	0.919695
	miR-133a	Spearman's ρ	0.224558	.372**	0.105559	0.214142	-0.0950941	-0.0869816	0.232959	-0.00556836	0.107767	0.102391	.250*	-0.0436348	0.015169	.351**	.348**	0.12284	.277*	0.0570757	0.142041	.257*	0.22331	0.0894777	.283*	0.238047	.338**	1	0.0584197	0.204781	.279*	0.121544	.329**	0.210637	0.0756528	.266*	0.0531874	0.1911	0.0564996	0.0564036	0.205261	.271*	.315*	0.241359	0.152218	0.203005	0.0570757	.288*	0.112807
		p (two-sided)	0.0768341	0.00267966	0.410296	0.0919361	0.458479	0.497863	0.0661514	0.965452	0.400518	0.424564	0.0480128	0.734183	0.906071	0.00477621	0.0052102	0.337496	0.0278359	0.656815	0.266792	0.0420929	0.0785322	0.485561	0.0244727	0.060284	0.00681101		0.649256	0.107406	0.0265927	0.342656	0.00851657	0.0975089	0.555662	0.0350806	0.678873	0.133536	0.660065	0.660607	0.106566	0.0315168	0.0119609	0.0566961	0.233673	0.110556	0.656815	0.0222864	0.378716
	miR-662	Spearman's ρ	-0.160666	-0.179051	-0.0554916	0.18822	-0.242368	0.151402	-0.243904	0.165035	-0.0854455	0.135033	-0.0167051	-0.0169451	-0.0516993	-0.0227055	0.101911	0.189852	0.0278898	0.200605	0.0848694	-0.199165	-0.101094	.570**	-.368**	-0.0749808	-0.232143	0.0584197	1	-0.168539	-0.155626	0.229311	.393**	0.143097	-.301*	-.350**	0.111943	-0.136905	-0.164267	-0.0880856	-0.128792	0.132488	0.0405146	0.0346102	.397**	0.140121	0.200605	0.0588998	0.0688844
		p (two-sided)	0.208427	0.160291	0.665768	0.139602	0.0556391	0.236218	0.0540594	0.196158	0.505513	0.291349	0.896609	0.895132	0.687388	0.859797	0.426751	0.13614	0.828226	0.114925	0.508397	0.117609	0.430482	1.07664e-06	0.0029968	0.559189	0.0671338	0.649256		0.186696	0.223245	0.0706341	0.00143764	0.263215	0.0164586	0.00495723	0.382402	0.284648	0.198277	0.492402	0.314424	0.300618	0.752561	0.787707	0.00125704	0.273377	0.114925	0.646565	0.591653
	miR-505	Spearman's ρ	.474**	.425**	0.140793	0.062308	0.172907	0.0441148	.439**	0.0014881	.295*	.367**	0.110743	0.176891	.380**	.303*	0.177755	0.108295	0.228063	-0.046947	0.21155	.382**	.427**	-0.0197293	.482**	.371**	.458**	0.204781	-0.168539	1	.432**	0.0512193	-0.0809812	0.0733007	.518**	.507**	0.0106087	.380**	0.233487	0.206749	.416**	0.0607239	0.190476	0.230751	0.0590438	0.0108967	-0.046947	0.170555	0.0333621
		p (two-sided)	8.82516e-05	0.000513018	0.27106	0.627589	0.175368	0.731368	0.000313931	0.990765	0.018909	0.00307488	0.387557	0.165478	0.00210084	0.0156471	0.163389	0.3982	0.0722223	0.714835	0.0960337	0.00197977	0.00048	0.878024	6.43663e-05	0.00273159	0.000160424	0.107406	0.186696		0.000402728	0.690143	0.528083	0.568051	1.3643e-05	2.26861e-05	0.934233	0.00214566	0.065522	0.103997	0.000696833	0.63638	0.134833	0.0688365	0.645759	0.932452	0.714835	0.181404	0.795193
	miR-19a	Spearman's ρ	.716**	.722**	0.133401	-0.0217934	0.0680204	-0.167963	.547**	0.0596198	.275*	.467**	0.199117	0.200365	.288*	.321*	.403**	-0.0868376	.291*	-0.173339	0.188028	.686**	.696**	-0.147801	.663**	.595**	.577**	.279*	-0.155626	.432**	1	-0.133689	-0.107911	-0.150586	.362**	.527**	-0.137961	.694**	0.0556356	0.0585637	.293*	-0.0841974	.261*	0.047475	-0.0103207	-0.0170891	-0.173339	0.0340822	-0.12596
		p (two-sided)	4.0338e-11	2.50176e-11	0.297273	0.865375	0.596322	0.188229	3.54218e-06	0.642537	0.0289525	0.000115961	0.117699	0.115369	0.0219156	0.0102072	0.00106776	0.498578	0.0206807	0.174275	0.140014	5.45937e-10	2.48479e-10	0.247678	3.23586e-09	2.66428e-07	7.3489e-07	0.0265927	0.223245	0.000402728		0.296222	0.399885	0.238783	0.00350707	9.1216e-06	0.280914	2.96231e-10	0.664952	0.648448	0.0199685	0.511773	0.0384913	0.711767	0.936015	0.894246	0.174275	0.790872	0.325272
	miR-302b-5p	Spearman's ρ	0.0169931	-0.120488	0.0535714	.554**	-0.0748848	0.0991743	0.130856	0.18102	-0.0575077	0.0144489	0.0711886	0.0132008	-0.140313	.298*	0.0723406	.574**	0.0192492	.500**	-0.149578	-0.162634	-0.0878936	.338**	-0.00590438	-0.201421	-0.0988863	0.121544	0.229311	0.0512193	-0.133689	1	.412**	.733**	0.0164651	0.144297	.461**	-0.132728	0.122792	0.0599078	0.172187	.437**	0.0197773	.296*	0.210685	.276*	.500**	.379**	.508**
		p (two-sided)	0.894836	0.346898	0.676682	2.41523e-06	0.559693	0.439334	0.306665	0.15567	0.654382	0.910511	0.579284	0.918213	0.272714	0.017514	0.573144	8.56652e-07	0.880969	2.95341e-05	0.241978	0.202834	0.493349	0.00677752	0.963369	0.113425	0.440671	0.342656	0.0706341	0.690143	0.296222		0.000789659	8.51796e-12	0.898087	0.259191	0.000144284	0.299736	0.337686	0.640928	0.1772	0.000347282	0.877729	0.0183281	0.0974308	0.0287204	2.95341e-05	0.00220984	2.10446e-05
	miR-639	Spearman's ρ	-0.128792	-0.0649482	-0.103927	.404**	-0.092982	0.108103	-0.0195853	.422**	-0.0320661	0.0100326	0.229695	0.0364343	-0.0518913	0.149386	0.0343222	.399**	-0.143049	0.213134	-0.0247216	-0.154618	-0.0597638	.409**	-0.131288	-0.180492	-0.121688	.329**	.393**	-0.0809812	-0.107911	.412**	1	.457**	-0.158794	0.0183852	.403**	-0.0871256	-0.0640841	-0.0797811	-0.00120008	.339**	0.0884697	0.0898618	.474**	.392**	0.213134	0.203341	.380**
		p (two-sided)	0.314424	0.613052	0.417611	0.0010173	0.468566	0.399042	0.878907	0.000563257	0.802987	0.937797	0.0701511	0.7768	0.686287	0.24259	0.789433	0.00119321	0.263377	0.093513	0.84749	0.226295	0.641732	0.000875858	0.305057	0.1569	0.342081	0.00851657	0.00143764	0.528083	0.399885	0.000789659		0.000166557	0.213847	0.886276	0.00105334	0.497149	0.617794	0.534235	0.992552	0.0065148	0.49051	0.483683	8.57977e-05	0.00146955	0.093513	0.109954	0.00211271
	miR-488	Spearman's ρ	-0.0357143	-0.180156	-0.0107047	.552**	-0.0966782	0.0117127	0.0990303	0.239871	-0.115015	-0.122408	0.0251536	-0.0743568	-0.188268	.285*	0.0352823	.597**	-0.18486	.439**	-0.12116	-0.215246	-0.0300019	0.154906	-0.062932	-0.211262	-0.190188	0.210637	0.143097	0.0733007	-0.150586	.733**	.457**	1	0.0120968	0.165995	.586**	-0.171899	0.146985	0.210733	0.235455	.577**	0.201565	.266*	.275*	.314*	.439**	.324**	.442**
		p (two-sided)	0.7811	0.157686	0.933639	2.75138e-06	0.450993	0.927406	0.440002	0.058286	0.369394	0.33921	0.844858	0.562473	0.1395	0.0236509	0.783684	2.44421e-07	0.146938	0.000320899	0.344195	0.090233	0.815438	0.225421	0.62414	0.0964976	0.135435	0.0975089	0.263215	0.568051	0.238783	8.51796e-12	0.000166557		0.925033	0.193533	4.51337e-07	0.177936	0.250327	0.0973528	0.0632182	7.31062e-07	0.113162	0.0350123	0.0288653	0.0123357	0.000320899	0.00957992	0.000285469
	miR-93-3p	Spearman's ρ	.434**	.270*	.354**	-0.0658122	0.142425	-0.0846774	.330**	0.122936	.325**	.277*	0.0272177	0.0721006	.282*	.277*	0.192492	-0.0790611	0.203677	0.0404666	0.170315	.389**	.342**	-0.0577477	.415**	.348**	.381**	0.0756528	-.301*	.518**	.362**	0.0164651	-0.158794	0.0120968	1	.416**	0.121832	.296*	.265*	.344**	.453**	0.0745008	0.233583	0.184428	0.0612519	0.062308	0.0404666	.291*	0.100422
		p (two-sided)	0.000373758	0.0320835	0.00446039	0.608326	0.265487	0.50936	0.00819562	0.337115	0.00931207	0.0279204	0.832304	0.574421	0.0249567	0.0280619	0.130677	0.537943	0.109356	0.752845	0.182028	0.00165074	0.00611454	0.653031	0.000714566	0.00523012	0.00203662	0.555662	0.0164586	1.3643e-05	0.00350707	0.898087	0.213847	0.925033		0.000707868	0.341505	0.0184073	0.0359088	0.0058305	0.000195354	0.561714	0.0654081	0.147902	0.633444	0.627589	0.752845	0.0206807	0.433569
	miR-19b	Spearman's ρ	.599**	.637**	.311*	0.156154	.348**	-0.146121	.777**	-0.046803	.260*	.316*	0.215918	0.138441	.376**	.503**	.362**	0.016033	.261*	-0.00062404	0.144201	.573**	.637**	-0.222926	.793**	.530**	.636**	.266*	-.350**	.507**	.527**	0.144297	0.0183852	0.165995	.416**	1	0.162634	.617**	0.112471	0.136857	.516**	0.159034	.321*	0.216398	0.0030722	0.127448	-0.00062404	.303*	0.133497
		p (two-sided)	2.14896e-07	1.99885e-08	0.0131158	0.221659	0.00519035	0.253153	7.28889e-14	0.715673	0.0398773	0.0116629	0.0892085	0.279227	0.00237951	2.61154e-05	0.00359684	0.900747	0.0386763	0.996127	0.259511	9.35171e-07	1.96703e-08	0.0790606	9.74146e-15	7.8205e-06	2.11074e-08	0.0350806	0.00495723	2.26861e-05	9.1216e-06	0.259191	0.886276	0.193533	0.000707868		0.202834	7.40232e-08	0.380147	0.284819	1.48688e-05	0.213147	0.0104119	0.0884823	0.980935	0.319543	0.996127	0.015751	0.296923
	miR-551b	Spearman's ρ	0.0368184	-0.129128	-0.078149	.339**	0.0320661	0.0858775	0.0123848	0.183612	-0.0647561	-0.170459	0.0876536	-0.0167531	-0.133449	.266*	0.113191	.378**	-0.0925499	.356**	-0.0815092	-0.162634	-0.0557316	.262*	-0.0227535	-0.128552	-0.0795891	0.0531874	0.111943	0.0106087	-0.137961	.461**	.403**	.586**	0.121832	0.162634	1	-0.0848214	-0.00571237	0.00528034	-0.000384025	.403**	0.136809	0.191772	.320*	0.204157	.356**	0.0814132	.315*
		p (two-sided)	0.774509	0.313152	0.542657	0.00657963	0.802987	0.503355	0.923253	0.149735	0.614105	0.181653	0.494535	0.896313	0.297098	0.0349441	0.377085	0.002241	0.470643	0.00418498	0.525388	0.202834	0.664408	0.0382704	0.859503	0.315334	0.535223	0.678873	0.382402	0.934233	0.280914	0.000144284	0.00105334	4.51337e-07	0.341505	0.202834		0.508638	0.964559	0.967238	0.997617	0.00107099	0.28499	0.13215	0.0105217	0.108505	0.00418498	0.525878	0.0119336
	miR-532	Spearman's ρ	.754**	.695**	0.0534274	-0.143673	.269*	-0.140985	.547**	-0.145257	.298*	.387**	.392**	0.194268	.382**	.453**	.487**	-0.178955	.313*	-0.242992	0.22451	.576**	.695**	-0.179339	.675**	.492**	.613**	0.1911	-0.136905	.380**	.694**	-0.132728	-0.0871256	-0.171899	.296*	.617**	-0.0848214	1	-0.0360023	0.0324981	0.206845	-0.106951	.274*	0.117992	-0.031826	-0.0391705	-0.242992	0.0104647	-0.133977
		p (two-sided)	9.67051e-13	2.56578e-10	0.677503	0.261278	0.0328848	0.2704	3.56738e-06	0.256001	0.017705	0.00171134	0.00149772	0.127096	0.00199103	0.000189588	5.10856e-05	0.160519	0.0124913	0.0549929	0.0768989	7.88441e-07	2.58641e-10	0.159608	1.35082e-09	4.25222e-05	9.0048e-08	0.133536	0.284648	0.00214566	2.96231e-10	0.299736	0.497149	0.177936	0.0184073	7.40232e-08	0.508638		0.779379	0.800387	0.103833	0.404116	0.0296581	0.357052	0.804432	0.76052	0.0549929	0.935124	0.295173
	miR-1300	Spearman's ρ	-0.0292819	0.0751728	-0.0261617	0.114055	0.0842934	.253*	0.0353783	0.21371	-0.214286	-0.00729647	0.0844854	0.0606759	0.00427227	0.109543	0.0756048	0.236511	-0.0336022	0.0249616	0.153754	0.0277938	0.00979263	0.0139209	0.104023	-0.0333141	0.0453629	0.0564996	-0.164267	0.233487	0.0556356	0.122792	-0.0640841	0.146985	.265*	0.112471	-0.00571237	-0.0360023	1	.298*	.441**	0.0111367	-0.015937	-0.105223	0.0914459	0.203629	0.0249616	.350**	0.00892857
		p (two-sided)	0.819792	0.55818	0.838722	0.37343	0.51129	0.0453308	0.783109	0.0926093	0.0917125	0.95474	0.510325	0.636647	0.97349	0.392753	0.555914	0.0620092	0.793752	0.846028	0.228932	0.828808	0.939282	0.913769	0.417179	0.795481	0.724067	0.660065	0.198277	0.065522	0.664952	0.337686	0.617794	0.250327	0.0359088	0.380147	0.964559	0.779379		0.0178784	0.000296861	0.930968	0.901338	0.411796	0.475976	0.109441	0.846028	0.00493823	0.944631
	miR-30d-3p	Spearman's ρ	0.205069	0.150298	0.135705	0.15313	-0.00110407	0.167195	0.117512	0.101815	0.0748368	0.00888057	0.185148	0.222734	0.22091	0.234399	0.138921	0.15433	0.0728207	0.16009	.286*	0.108631	0.107431	-0.137817	0.109303	0.115015	0.0980703	0.0564036	-0.0880856	0.206749	0.0585637	0.0599078	-0.0797811	0.210733	.344**	0.136857	0.00528034	0.0324981	.298*	1	.259*	0.103831	.399**	0.0665803	.271*	0.174587	0.16009	0.197005	.249*
		p (two-sided)	0.106902	0.239693	0.288932	0.23085	0.993148	0.190286	0.359025	0.427189	0.559946	0.944928	0.146299	0.0793258	0.0818812	0.0644461	0.277547	0.227172	0.570595	0.210084	0.022996	0.396729	0.401997	0.281421	0.393797	0.369394	0.44447	0.660607	0.492402	0.103997	0.648448	0.640928	0.534235	0.0973528	0.0058305	0.284819	0.967238	0.800387	0.0178784		0.0406434	0.418044	0.00118433	0.604139	0.0315794	0.171146	0.210084	0.121725	0.0487257
	miR-22	Spearman's ρ	.307*	.380**	.326**	.335**	0.207277	0.046611	.369**	0.223646	0.200989	.277*	-0.0215054	0.0640361	.266*	0.233679	0.224702	0.195084	0.137865	0.1178	0.201469	.275*	.375**	0.0395065	.445**	.349**	.389**	0.205261	-0.128792	.416**	.293*	0.172187	-0.00120008	0.235455	.453**	.516**	-0.000384025	0.206845	.441**	.259*	1	0.144729	.291*	0.246496	0.0283698	0.127784	0.1178	.641**	0.139497
		p (two-sided)	0.0144137	0.00213663	0.00905075	0.00729523	0.103097	0.71679	0.00294439	0.0780721	0.114217	0.027977	0.867138	0.618058	0.0349441	0.0652943	0.0766401	0.125475	0.281252	0.35784	0.113337	0.0290691	0.00242623	0.758528	0.000258048	0.00507909	0.00164836	0.106566	0.314424	0.000696833	0.0199685	0.1772	0.992552	0.0632182	0.000195354	1.48688e-05	0.997617	0.103833	0.000296861	0.0406434		0.257752	0.0206369	0.0514765	0.825315	0.318258	0.35784	1.47478e-08	0.27554
	miR-1247	Spearman's ρ	0.031346	-0.0803571	-0.0638921	.509**	-0.170843	0.0649962	0.138633	0.0891417	0.0296659	-0.0123368	0.0883737	0.0145929	0.00120008	0.228927	0.160282	.269*	-0.0267377	.670**	-0.177563	-0.130952	-0.00662442	0.177899	-0.0507873	-0.078197	-0.00537634	.271*	0.132488	0.0607239	-0.0841974	.437**	.339**	.577**	0.0745008	0.159034	.403**	-0.106951	0.0111367	0.103831	0.144729	1	0.093558	.576**	.436**	.378**	.670**	0.202141	.481**
		p (two-sided)	0.807325	0.531278	0.61885	2.0351e-05	0.180657	0.612789	0.278555	0.487208	0.817469	0.92355	0.490982	0.909623	0.992552	0.0711198	0.209531	0.0331121	0.83522	1.93316e-09	0.163852	0.306307	0.958905	0.163042	0.692626	0.542409	0.966643	0.0315168	0.300618	0.63638	0.511773	0.000347282	0.0065148	7.31062e-07	0.561714	0.213147	0.00107099	0.404116	0.930968	0.418044	0.257752		0.465803	7.86394e-07	0.000349616	0.00223473	1.93316e-09	0.112114	6.61225e-05
	miR-139-5p	Spearman's ρ	.283*	.281*	0.0211214	0.0366743	-0.109975	-0.0386425	.265*	0.0796371	0.238815	0.061924	0.154138	0.176075	0.0264497	.360**	.428**	0.0904378	.269*	0.016273	0.150634	0.18822	.371**	-0.0354263	.261*	.333**	.289*	.315*	0.0405146	0.190476	.261*	0.0197773	0.0884697	0.201565	0.233583	.321*	0.136809	.274*	-0.015937	.399**	.291*	0.093558	1	.360**	0.211694	0.0379224	0.016273	0.192732	0.157402
		p (two-sided)	0.0247264	0.025711	0.86949	0.775368	0.390878	0.763654	0.0360833	0.534976	0.0594361	0.629716	0.227757	0.16747	0.836971	0.00373779	0.00046309	0.480873	0.0333079	0.899269	0.238632	0.139602	0.00278442	0.782822	0.0384913	0.00764072	0.0216866	0.0119609	0.752561	0.134833	0.0384913	0.877729	0.49051	0.113162	0.0654081	0.0104119	0.28499	0.0296581	0.901338	0.00118433	0.0206369	0.465803		0.00370823	0.0958024	0.767934	0.899269	0.130188	0.217942
	miR-1227	Spearman's ρ	0.183324	0.124712	0.0182412	.337**	-0.0452189	-0.0061924	.256*	0.0346102	.334**	0.09375	0.200557	.266*	0.136665	.354**	.365**	0.0442588	0.18246	.416**	0.113239	0.0977823	0.136185	0.164747	0.102199	0.0955261	0.196525	0.241359	0.0346102	0.230751	0.047475	.296*	0.0898618	.266*	0.184428	0.216398	0.191772	0.117992	-0.105223	0.0665803	0.246496	.576**	.360**	1	.300*	0.216734	.416**	0.104743	.446**
		p (two-sided)	0.150386	0.330127	0.887161	0.00698061	0.724908	0.961583	0.0431368	0.787707	0.00746623	0.464884	0.115014	0.0353205	0.285502	0.00439151	0.00330235	0.730525	0.152352	0.000695738	0.376881	0.445815	0.287213	0.196951	0.425438	0.456431	0.122655	0.0566961	0.787707	0.0688365	0.711767	0.0183281	0.483683	0.0350123	0.147902	0.0884823	0.13215	0.357052	0.411796	0.604139	0.0514765	7.86394e-07	0.00370823		0.0167309	0.0879767	0.000695738	0.413944	0.000245473
	miR-661	Spearman's ρ	0.0805492	0.0644681	-0.077525	0.243136	0.132921	0.234207	0.0251056	0.162442	0.0741167	0.101046	.269*	.312*	.277*	.337**	.317*	0.168347	0.112807	.251*	0.22211	0.046755	-0.0529954	.377**	-0.0557796	0.178427	0.0959101	0.152218	.397**	0.0590438	-0.0103207	0.210685	.474**	.275*	0.0612519	0.0030722	.320*	-0.031826	0.0914459	.271*	0.0283698	.436**	0.211694	.300*	1	.405**	.251*	0.0646601	.315*
		p (two-sided)	0.530294	0.615685	0.545895	0.0548447	0.299031	0.0646714	0.84515	0.203375	0.563738	0.430702	0.0327877	0.0126773	0.0277515	0.00688687	0.0114634	0.187206	0.378716	0.0473961	0.0801928	0.715952	0.67997	0.0023271	0.664137	0.161777	0.454614	0.233673	0.00125704	0.645759	0.936015	0.0974308	8.57977e-05	0.0288653	0.633444	0.980935	0.0105217	0.804432	0.475976	0.0315794	0.825315	0.000349616	0.0958024	0.0167309		0.00100808	0.0473961	0.614631	0.0120433
	miR-888	Spearman's ρ	-0.046899	-0.0227535	0.0285618	.429**	0.0606279	0.152506	0.179531	.337**	-0.00484831	-0.0253456	0.0923579	0.0488671	0.197773	0.219278	0.0598118	.275*	-0.0845814	.304*	0.0964862	0.0854455	0.0047523	0.230127	-0.0594278	0.0189612	-0.162682	0.203005	0.140121	0.0108967	-0.0170891	.276*	.392**	.314*	0.062308	0.127448	0.204157	-0.0391705	0.203629	0.174587	0.127784	.378**	0.0379224	0.216734	.405**	1	.304*	0.198925	.250*
		p (two-sided)	0.715114	0.859503	0.824152	0.000445263	0.636915	0.232779	0.159155	0.00687841	0.969917	0.843688	0.471568	0.7037	0.120249	0.0842223	0.641464	0.0291275	0.509842	0.015561	0.451896	0.505513	0.970513	0.0696109	0.64361	0.882738	0.202699	0.110556	0.273377	0.932452	0.894246	0.0287204	0.00146955	0.0123357	0.627589	0.319543	0.108505	0.76052	0.109441	0.171146	0.318258	0.00223473	0.767934	0.0879767	0.00100808		0.015561	0.118061	0.0481903
	miR-337-5p	Spearman's ρ	-0.110983	-0.19182	0.0360023	.608**	-0.0791571	0.101767	-0.0061924	0.164171	0.0106087	9.60061e-05	-0.093126	-0.0658122	-0.0928859	0.13124	0.0371544	.396**	0.0077765	1.000**	-0.0915419	-0.141993	-0.136137	0.232623	-0.117752	-0.129944	-0.0738287	0.0570757	0.200605	-0.046947	-0.173339	.500**	0.213134	.439**	0.0404666	-0.00062404	.356**	-0.242992	0.0249616	0.16009	0.1178	.670**	0.016273	.416**	.251*	.304*	1	.272*	.627**
		p (two-sided)	0.386523	0.132051	0.779379	1.25323e-07	0.537448	0.427408	0.961583	0.198543	0.934233	0.999404	0.467874	0.608326	0.469027	0.305235	0.772506	0.00132198	0.951766		0.475511	0.266955	0.287385	0.0665545	0.358038	0.310078	0.565259	0.656815	0.114925	0.714835	0.174275	2.95341e-05	0.093513	0.000320899	0.752845	0.996127	0.00418498	0.0549929	0.846028	0.210084	0.35784	1.93316e-09	0.899269	0.000695738	0.0473961	0.015561		0.0310818	3.9467e-08
	miR-489	Spearman's ρ	0.078725	0.152794	0.199069	.339**	0.0976863	0.0332181	.256*	.298*	0.231039	0.102103	-0.078053	-0.201325	0.0982623	0.241503	0.137817	.311*	0.0715246	.272*	0.06322	0.15961	0.105223	0.127016	0.188508	0.12548	0.1899	.288*	0.0588998	0.170555	0.0340822	.379**	0.203341	.324**	.291*	.303*	0.0814132	0.0104647	.350**	0.197005	.641**	0.202141	0.192732	0.104743	0.0646601	0.198925	.272*	1	.266*
		p (two-sided)	0.539677	0.231887	0.11779	0.00655525	0.446264	0.796058	0.042532	0.0176284	0.0684814	0.425875	0.543155	0.1136	0.443574	0.0565441	0.281421	0.0130418	0.57749	0.0310818	0.622551	0.211473	0.411796	0.321199	0.138987	0.327134	0.136039	0.0222864	0.646565	0.181404	0.790872	0.00220984	0.109954	0.00957992	0.0206807	0.015751	0.525878	0.935124	0.00493823	0.121725	1.47478e-08	0.112114	0.130188	0.413944	0.614631	0.118061	0.0310818		0.0354237
	miR-432	Spearman's ρ	0.0258257	-0.0192972	-0.0604359	.490**	-0.015361	0.113527	0.0675883	0.0794451	0.0637481	0.0948061	0.0801651	0.0605799	0.0273618	0.243568	0.128984	.365**	-0.046467	.627**	-0.0648041	-0.0403706	-0.0381144	0.216926	0.0377784	-0.0769489	0.0129608	0.112807	0.0688844	0.0333621	-0.12596	.508**	.380**	.442**	0.100422	0.133497	.315*	-0.133977	0.00892857	.249*	0.139497	.481**	0.157402	.446**	.315*	.250*	.627**	.266*	1
		p (two-sided)	0.840766	0.880675	0.637984	4.57562e-05	0.904888	0.375661	0.598662	0.535964	0.619642	0.459847	0.532263	0.637182	0.83143	0.0544018	0.313697	0.00329792	0.717629	3.9467e-08	0.613841	0.753412	0.766792	0.0876889	0.768791	0.548891	0.919695	0.378716	0.591653	0.795193	0.325272	2.10446e-05	0.00211271	0.000285469	0.433569	0.296923	0.0119336	0.295173	0.944631	0.0487257	0.27554	6.61225e-05	0.217942	0.000245473	0.0120433	0.0481903	3.9467e-08	0.0354237
**. Statistically signifficant p<0.01 (two-sided).
*. Statistically signifficant p<0.05 (two-sided).

## Sheet: Non-classical monocytes
Correlations
			miR-1291	miR-886-3p	miR-195	miR-451	miR-454	miR-487b	miR-551b	miR-124a	miR-144-5p	miR-489	miR-130b-5p	miR-885-5p	miR-922	miR-20a-3p	miR-10a	miR-149-3p	miR-324-5p	miR-381	miR-299-5p	miR-1208	miR-1183	miR-939	miR-566	miR-133a	miR-876-3p	miR-502	miR-644	miR-639	miR-99b	miR-518a-5p	miR-1244
Spearman's ρ	miR-1291	Spearman's ρ	1	.430**	.278*	0.212057	0.168112	-0.0544685	0.0988366	.547**	0.102327	-0.136383	0.251243	0.0886304	.374**	0.0194077	-0.0260709	0.124379	.307*	0.0987308	-0.010312	0.206293	0.0622951	.441**	.566**	.339**	0.213644	.334**	.397**	.452**	.559**	.392**	.636**
		p (two-sided)		0.000541298	0.0299299	0.100865	0.195295	0.676736	0.448555	5.00452e-06	0.432613	0.294613	0.0508046	0.496984	0.00299196	0.881982	0.841918	0.339554	0.0161294	0.449043	0.937132	0.110695	0.633406	0.000376994	2.03958e-06	0.00757275	0.0982823	0.00862127	0.00152932	0.000259888	2.7892e-06	0.00178118	3.59405e-08
	miR-886-3p	Spearman's ρ	.430**	1	.453**	0.244685	.474**	0.0838181	0.135537	.537**	0.25156	-0.0487573	.306*	0.154786	.339**	0.161766	0.143786	0.0526177	0.097779	0.0423585	0.0598625	0.133104	-0.0639873	.341**	.282*	.391**	.355**	.273*	.403**	.376**	.386**	.331**	.291*
		p (two-sided)	0.000541298		0.000249853	0.0573652	0.000115888	0.520725	0.297647	8.12368e-06	0.0505034	0.709036	0.0166166	0.233614	0.0074931	0.212941	0.268929	0.687144	0.453448	0.745838	0.646751	0.306483	0.62419	0.00723929	0.0276358	0.00183466	0.00505832	0.0330109	0.00128274	0.00284105	0.00210155	0.00917364	0.0228862
	miR-195	Spearman's ρ	.278*	.453**	1	.356**	.693**	0.111951	-0.000740349	0.0915389	.334**	0.0649392	.280*	0.0673718	0.111052	.320*	.447**	0.00793231	0.0227922	-.255*	-0.120465	0.00528821	-.322*	0.0875727	.416**	0.179429	0.206769	.320*	0.0673189	-0.000846113	.284*	0.020201	0.0519831
		p (two-sided)	0.0299299	0.000249853		0.00491962	6.07659e-10	0.390349	0.995482	0.482912	0.00852098	0.619031	0.0288423	0.60593	0.39419	0.0118343	0.00029991	0.95162	0.861588	0.0470012	0.355084	0.967736	0.0114134	0.502153	0.000850024	0.166465	0.109856	0.0118786	0.606214	0.994836	0.02656	0.877195	0.690725
	miR-451	Spearman's ρ	0.212057	0.244685	.356**	1	.368**	0.043046	0.0143839	0.22073	.493**	-0.0671074	0.24569	0.122581	0.213168	.275*	0.131306	-0.0431518	0.12385	0.0402433	0.00454786	0.0414595	0.140931	0.177261	0.169011	.358**	.287*	0.144685	0.143892	0.145902	.315*	.309*	.314*
		p (two-sided)	0.100865	0.0573652	0.00491962		0.00353408	0.741855	0.912391	0.0873686	5.32904e-05	0.607348	0.0563176	0.346636	0.0990517	0.0318986	0.313122	0.741243	0.341627	0.758134	0.972251	0.751056	0.278653	0.171732	0.192882	0.00461324	0.0249289	0.265916	0.268574	0.261875	0.0132919	0.0152283	0.0136213
	miR-454	Spearman's ρ	0.168112	.474**	.693**	.368**	1	0.0790587	-0.0507668	0.0415124	.331**	0.0848757	0.145531	0.0217345	0.117663	.324*	.380**	-0.0616605	0.164252	-0.237123	-0.146007	-0.170545	-0.100899	0.0601269	.265*	0.170069	0.0213644	0.236489	-0.00312004	-0.0156531	0.238075	-0.0257536	0.0764146
		p (two-sided)	0.195295	0.000115888	6.07659e-10	0.00353408		0.544752	0.69761	0.750749	0.00928057	0.515459	0.2631	0.867952	0.36647	0.0109779	0.00252504	0.636876	0.2059	0.0657658	0.261526	0.188816	0.439096	0.645295	0.0387049	0.190071	0.870182	0.0665135	0.980961	0.904695	0.064657	0.843817	0.558328
	miR-487b	Spearman's ρ	-0.0544685	0.0838181	0.111951	0.043046	0.0790587	1	0.0418826	0.0879429	-0.0111052	0.0312533	.340**	0.0511898	0.0249603	.331**	0.181068	0.102221	0.0375463	0.165468	0.219249	0.0463247	0.0471179	0.044844	-0.120888	0.0125859	.274*	0.058752	0.16642	0.0290323	0.152882	0.164093	-0.0120571
		p (two-sided)	0.676736	0.520725	0.390349	0.741855	0.544752		0.748599	0.500341	0.932307	0.811024	0.00736524	0.695212	0.84857	0.0091147	0.162562	0.433092	0.773898	0.202516	0.0895665	0.722955	0.718406	0.731471	0.353384	0.923307	0.0329404	0.652881	0.199895	0.824232	0.239485	0.206345	0.92652
	miR-551b	Spearman's ρ	0.0988366	0.135537	-0.000740349	0.0143839	-0.0507668	0.0418826	1	0.152406	0.103649	-0.12771	0.245426	0.0390799	0.119566	-0.0740878	-0.243046	.338**	0.189053	.404**	0.214384	.467**	.324*	.323*	.263*	.300*	0.232575	0.223956	.442**	.359**	0.232258	.412**	.369**
		p (two-sided)	0.448555	0.297647	0.995482	0.912391	0.69761	0.748599		0.240968	0.42666	0.326673	0.0565917	0.764922	0.358712	0.570406	0.0591082	0.0076936	0.144509	0.00124599	0.0970947	0.000146459	0.0108953	0.0111308	0.0404258	0.0189125	0.071276	0.0827272	0.000367543	0.00451069	0.0716738	0.00095544	0.00339836
	miR-124a	Spearman's ρ	.547**	.537**	0.0915389	0.22073	0.0415124	0.0879429	0.152406	1	0.117187	0.0126917	.287*	0.163511	.421**	0.148757	0.111211	0.0729773	0.179112	0.178847	0.0799577	0.114331	0.188577	.531**	.395**	.390**	.401**	0.194553	.396**	.428**	.455**	.502**	.550**
		p (two-sided)	5.00452e-06	8.12368e-06	0.482912	0.0873686	0.750749	0.500341	0.240968		0.368425	0.922664	0.0249847	0.20798	0.000738717	0.252551	0.393511	0.576213	0.167229	0.167867	0.540172	0.38029	0.145541	1.08078e-05	0.00164448	0.00190131	0.00138114	0.132976	0.00156853	0.000586575	0.00022737	3.69092e-05	4.31945e-06
	miR-144-5p	Spearman's ρ	0.102327	0.25156	.334**	.493**	.331**	-0.0111052	0.103649	0.117187	1	0.183818	.281*	.328**	.290*	.347**	0.137864	0.0423057	0.0671602	0.0236383	0.0931253	0.00629297	0.0112639	0.198308	0.19688	.268*	.315*	0.171602	0.08789	-0.0164463	0.150397	0.141565	0.216552
		p (two-sided)	0.432613	0.0505034	0.00852098	5.32904e-05	0.00928057	0.932307	0.42666	0.368425		0.156167	0.0282801	0.00991983	0.0231728	0.00612943	0.289353	0.746145	0.607065	0.856504	0.475327	0.96161	0.931342	0.12551	0.12831	0.0366971	0.0133736	0.186047	0.500599	0.899889	0.247301	0.276472	0.0936811
	miR-489	Spearman's ρ	-0.136383	-0.0487573	0.0649392	-0.0671074	0.0848757	0.0312533	-0.12771	0.0126917	0.183818	1	0.165204	0.201058	-0.0552618	0.169963	0.111264	.288*	-0.00787943	-0.0512427	-0.038551	-0.0628768	0.0853517	0.125489	0.00549974	-0.0942359	0.160973	0.00190375	-0.131941	-0.148757	0.00576415	-0.0983078	-0.0665785
		p (two-sided)	0.294613	0.709036	0.619031	0.607348	0.515459	0.811024	0.326673	0.922664	0.156167		0.203248	0.120247	0.672293	0.190351	0.393285	0.0241591	0.951942	0.694913	0.768014	0.630232	0.513098	0.335226	0.966446	0.470055	0.215223	0.988382	0.310768	0.252551	0.964834	0.450998	0.610189
	miR-130b-5p	Spearman's ρ	0.251243	.306*	.280*	0.24569	0.145531	.340**	0.245426	.287*	.281*	0.165204	1	.303*	0.225701	.271*	0.147541	0.186938	.310*	0.222634	.286*	0.217927	0.15743	0.249075	0.236277	.294*	.734**	.355**	.510**	.377**	.379**	.277*	.292*
		p (two-sided)	0.0508046	0.0166166	0.0288423	0.0563176	0.2631	0.00736524	0.0565917	0.0249847	0.0282801	0.203248		0.0177328	0.0802987	0.0345929	0.256494	0.149139	0.0150642	0.0846053	0.0252651	0.0915654	0.225626	0.0529024	0.0667642	0.021302	1.69395e-11	0.0050513	2.71232e-05	0.00278261	0.00257479	0.0304864	0.0222713
	miR-885-5p	Spearman's ρ	0.0886304	0.154786	0.0673718	0.122581	0.0217345	0.0511898	0.0390799	0.163511	.328**	0.201058	.303*	1	.338**	.365**	0.157324	0.113273	.278*	0.214172	0.132099	0.0406663	0.0177684	.355**	0.232628	0.220465	.279*	0.208884	0.0821787	-0.0533051	0.193813	0.0618191	.345**
		p (two-sided)	0.496984	0.233614	0.60593	0.346636	0.867952	0.695212	0.764922	0.20798	0.00991983	0.120247	0.0177328		0.00772408	0.00387513	0.225942	0.384741	0.03006	0.0974329	0.310182	0.75567	0.891888	0.00499548	0.0712099	0.087758	0.0294139	0.106189	0.52894	0.683271	0.134486	0.636008	0.0064178
	miR-922	Spearman's ρ	.374**	.339**	0.111052	0.213168	0.117663	0.0249603	0.119566	.421**	.290*	-0.0552618	0.225701	.338**	1	0.249762	.281*	0.160338	.419**	0.209254	0.200212	0.130566	0.0652565	.531**	.298*	.429**	.279*	.266*	.274*	0.222475	.448**	0.211423	.571**
		p (two-sided)	0.00299196	0.0074931	0.39419	0.0990517	0.36647	0.84857	0.358712	0.000738717	0.0231728	0.672293	0.0802987	0.00772408		0.0522298	0.0285288	0.217061	0.000769463	0.105557	0.121848	0.315882	0.617316	1.04761e-05	0.0194704	0.000561559	0.0292542	0.038424	0.0328701	0.0848329	0.000294413	0.101913	1.51872e-06
	miR-20a-3p	Spearman's ρ	0.0194077	0.161766	.320*	.275*	.324*	.331**	-0.0740878	0.148757	.347**	0.169963	.271*	.365**	0.249762	1	.469**	0.123268	0.151613	0.0123744	-0.0767848	-0.226811	-0.0319408	0.167107	0.0247488	0.155262	.325*	0.120307	0.0599683	0.0211528	.275*	-0.116922	0.132681
		p (two-sided)	0.881982	0.212941	0.0118343	0.0318986	0.0109779	0.0091147	0.570406	0.252551	0.00612943	0.190351	0.0345929	0.00387513	0.0522298		0.000136698	0.343917	0.243455	0.924592	0.556418	0.0787829	0.806947	0.198017	0.849839	0.232162	0.0106641	0.355722	0.646169	0.871456	0.0320359	0.369514	0.308037
	miR-10a	Spearman's ρ	-0.0260709	0.143786	.447**	0.131306	.380**	0.181068	-0.243046	0.111211	0.137864	0.111264	0.147541	0.157324	.281*	.469**	1	-0.121682	0.0984135	-0.238445	-0.187837	-.294*	-0.247647	0.141407	0.17652	0.104918	0.0682179	0.211211	-0.105605	-0.128979	0.113432	-0.166103	0.013908
		p (two-sided)	0.841918	0.268929	0.00029991	0.313122	0.00252504	0.162562	0.0591082	0.393511	0.289353	0.393285	0.256494	0.225942	0.0285288	0.000136698		0.350211	0.450509	0.0642298	0.147158	0.021302	0.054322	0.277016	0.173558	0.420988	0.601402	0.102264	0.417934	0.321848	0.384072	0.200766	0.915279
	miR-149-3p	Spearman's ρ	0.124379	0.0526177	0.00793231	-0.0431518	-0.0616605	0.102221	.338**	0.0729773	0.0423057	.288*	0.186938	0.113273	0.160338	0.123268	-0.121682	1	.277*	0.0791116	0.218403	.413**	.357**	.328**	-0.00518244	0.228874	.332**	0.143892	0.236224	0.218879	.435**	0.124326	0.227604
		p (two-sided)	0.339554	0.687144	0.95162	0.741243	0.636876	0.433092	0.0076936	0.576213	0.746145	0.0241591	0.149139	0.384741	0.217061	0.343917	0.350211		0.0305194	0.544482	0.0908418	0.000949112	0.0046915	0.00980653	0.968381	0.0760281	0.00900944	0.268574	0.066827	0.0901227	0.00046589	0.339761	0.0777141
	miR-324-5p	Spearman's ρ	.307*	0.097779	0.0227922	0.12385	0.164252	0.0375463	0.189053	0.179112	0.0671602	-0.00787943	.310*	.278*	.419**	0.151613	0.0984135	.277*	1	.355**	0.181967	0.177472	.412**	.490**	0.246219	.498**	.315*	.408**	.352**	.364**	.592**	0.241301	.556**
		p (two-sided)	0.0161294	0.453448	0.861588	0.341627	0.2059	0.773898	0.144509	0.167229	0.607065	0.951942	0.0150642	0.03006	0.000769463	0.243455	0.450509	0.0305194		0.00494021	0.160451	0.171213	0.000968209	6.15482e-05	0.0557725	4.47921e-05	0.0134393	0.00108668	0.00538306	0.00397616	5.05811e-07	0.0610106	3.27097e-06
	miR-381	Spearman's ρ	0.0987308	0.0423585	-.255*	0.0402433	-0.237123	0.165468	.404**	0.178847	0.0236383	-0.0512427	0.222634	0.214172	0.209254	0.0123744	-0.238445	0.0791116	.355**	1	.351**	0.145161	.364**	.422**	0.190904	0.22147	0.187203	0.146219	.275*	0.138551	.293*	.277*	.386**
		p (two-sided)	0.449043	0.745838	0.0470012	0.758134	0.0657658	0.202516	0.00124599	0.167867	0.856504	0.694913	0.0846053	0.0974329	0.105557	0.924592	0.0642298	0.544482	0.00494021		0.00555602	0.26433	0.00391975	0.00070185	0.140547	0.0862857	0.148554	0.260828	0.0321047	0.286931	0.0218692	0.0306517	0.0021177
	miR-299-5p	Spearman's ρ	-0.010312	0.0598625	-0.120465	0.00454786	-0.146007	0.219249	0.214384	0.0799577	0.0931253	-0.038551	.286*	0.132099	0.200212	-0.0767848	-0.187837	0.218403	0.181967	.351**	1	.260*	.338**	0.220095	0.0808038	0.16092	.384**	0.052935	.294*	0.189371	0.167266	0.175886	0.1945
		p (two-sided)	0.937132	0.646751	0.355084	0.972251	0.261526	0.0895665	0.0970947	0.540172	0.475327	0.768014	0.0252651	0.310182	0.121848	0.556418	0.147158	0.0908418	0.160451	0.00555602		0.0426436	0.00764304	0.0883053	0.53588	0.215376	0.00225785	0.685355	0.0215471	0.143824	0.197585	0.175134	0.133083
	miR-1208	Spearman's ρ	0.206293	0.133104	0.00528821	0.0414595	-0.170545	0.0463247	.467**	0.114331	0.00629297	-0.0628768	0.217927	0.0406663	0.130566	-0.226811	-.294*	.413**	0.177472	0.145161	.260*	1	.323*	.260*	0.07578	0.162242	.308*	0.128292	.574**	.374**	0.230249	.391**	0.235061
		p (two-sided)	0.110695	0.306483	0.967736	0.751056	0.188816	0.722955	0.000146459	0.38029	0.96161	0.630232	0.0915654	0.75567	0.315882	0.0787829	0.021302	0.000949112	0.171213	0.26433	0.0426436		0.0112149	0.0431694	0.56161	0.21158	0.0157485	0.324456	1.34245e-06	0.00298315	0.0742345	0.00181197	0.0682207
	miR-1183	Spearman's ρ	0.0622951	-0.0639873	-.322*	0.140931	-0.100899	0.0471179	.324*	0.188577	0.0112639	0.0853517	0.15743	0.0177684	0.0652565	-0.0319408	-0.247647	.357**	.412**	.364**	.338**	.323*	1	.301*	0.0899524	0.251613	0.218509	0.139609	.320*	.411**	.295*	.387**	.380**
		p (two-sided)	0.633406	0.62419	0.0114134	0.278653	0.439096	0.718406	0.0108953	0.145541	0.931342	0.513098	0.225626	0.891888	0.617316	0.806947	0.054322	0.0046915	0.000968209	0.00391975	0.00764304	0.0112149		0.0184544	0.490561	0.0504533	0.0906816	0.283232	0.0118343	0.000995856	0.0210835	0.00204115	0.00254407
	miR-939	Spearman's ρ	.441**	.341**	0.0875727	0.177261	0.0601269	0.044844	.323*	.531**	0.198308	0.125489	0.249075	.355**	.531**	0.167107	0.141407	.328**	.490**	.422**	0.220095	.260*	.301*	1	.500**	.427**	.283*	0.228556	.431**	.309*	.579**	.370**	.645**
		p (two-sided)	0.000376994	0.00723929	0.502153	0.171732	0.645295	0.731471	0.0111308	1.08078e-05	0.12551	0.335226	0.0529024	0.00499548	1.04761e-05	0.198017	0.277016	0.00980653	6.15482e-05	0.00070185	0.0883053	0.0431694	0.0184544		4.0366e-05	0.00060731	0.0270337	0.0764468	0.000525385	0.0153569	1.00845e-06	0.00334928	2.04311e-08
	miR-566	Spearman's ρ	.566**	.282*	.416**	0.169011	.265*	-0.120888	.263*	.395**	0.19688	0.00549974	0.236277	0.232628	.298*	0.0247488	0.17652	-0.00518244	0.246219	0.190904	0.0808038	0.07578	0.0899524	.500**	1	.313*	0.118667	.259*	0.186462	0.224537	.294*	0.219196	.511**
		p (two-sided)	2.03958e-06	0.0276358	0.000850024	0.192882	0.0387049	0.353384	0.0404258	0.00164448	0.12831	0.966446	0.0667642	0.0712099	0.0194704	0.849839	0.173558	0.968381	0.0557725	0.140547	0.53588	0.56161	0.490561	4.0366e-05		0.014077	0.362363	0.0438787	0.150196	0.0819113	0.0215471	0.0896458	2.5932e-05
	miR-133a	Spearman's ρ	.339**	.391**	0.179429	.358**	0.170069	0.0125859	.300*	.390**	.268*	-0.0942359	.294*	0.220465	.429**	0.155262	0.104918	0.228874	.498**	0.22147	0.16092	0.162242	0.251613	.427**	.313*	1	.383**	.306*	.399**	.409**	.496**	.417**	.469**
		p (two-sided)	0.00757275	0.00183466	0.166465	0.00461324	0.190071	0.923307	0.0189125	0.00190131	0.0366971	0.470055	0.021302	0.087758	0.000561559	0.232162	0.420988	0.0760281	4.47921e-05	0.0862857	0.215376	0.21158	0.0504533	0.00060731	0.014077		0.00230288	0.0163228	0.00144661	0.00106374	4.89234e-05	0.000828851	0.000136159
	miR-876-3p	Spearman's ρ	0.213644	.355**	0.206769	.287*	0.0213644	.274*	0.232575	.401**	.315*	0.160973	.734**	.279*	.279*	.325*	0.0682179	.332**	.315*	0.187203	.384**	.308*	0.218509	.283*	0.118667	.383**	1	0.229297	.557**	.415**	.429**	.442**	.275*
		p (two-sided)	0.0982823	0.00505832	0.109856	0.0249289	0.870182	0.0329404	0.071276	0.00138114	0.0133736	0.215223	1.69395e-11	0.0294139	0.0292542	0.0106641	0.601402	0.00900944	0.0134393	0.148554	0.00225785	0.0157485	0.0906816	0.0270337	0.362363	0.00230288		0.0754726	3.07282e-06	0.000868769	0.00055473	0.00035896	0.0321047
	miR-502	Spearman's ρ	.334**	.273*	.320*	0.144685	0.236489	0.058752	0.223956	0.194553	0.171602	0.00190375	.355**	0.208884	.266*	0.120307	0.211211	0.143892	.408**	0.146219	0.052935	0.128292	0.139609	0.228556	.259*	.306*	0.229297	1	.256*	0.164675	.378**	0.169223	.380**
		p (two-sided)	0.00862127	0.0330109	0.0118786	0.265916	0.0665135	0.652881	0.0827272	0.132976	0.186047	0.988382	0.0050513	0.106189	0.038424	0.355722	0.102264	0.268574	0.00108668	0.260828	0.685355	0.324456	0.283232	0.0764468	0.0438787	0.0163228	0.0754726		0.0461109	0.204719	0.0026849	0.192317	0.00255172
	miR-644	Spearman's ρ	.397**	.403**	0.0673189	0.143892	-0.00312004	0.16642	.442**	.396**	0.08789	-0.131941	.510**	0.0821787	.274*	0.0599683	-0.105605	0.236224	.352**	.275*	.294*	.574**	.320*	.431**	0.186462	.399**	.557**	.256*	1	.672**	.418**	.650**	.457**
		p (two-sided)	0.00152932	0.00128274	0.606214	0.268574	0.980961	0.199895	0.000367543	0.00156853	0.500599	0.310768	2.71232e-05	0.52894	0.0328701	0.646169	0.417934	0.066827	0.00538306	0.0321047	0.0215471	1.34245e-06	0.0118343	0.000525385	0.150196	0.00144661	3.07282e-06	0.0461109		2.94052e-09	0.000795963	1.43203e-08	0.000215193
	miR-639	Spearman's ρ	.452**	.376**	-0.000846113	0.145902	-0.0156531	0.0290323	.359**	.428**	-0.0164463	-0.148757	.377**	-0.0533051	0.222475	0.0211528	-0.128979	0.218879	.364**	0.138551	0.189371	.374**	.411**	.309*	0.224537	.409**	.415**	0.164675	.672**	1	.472**	.618**	.491**
		p (two-sided)	0.000259888	0.00284105	0.994836	0.261875	0.904695	0.824232	0.00451069	0.000586575	0.899889	0.252551	0.00278261	0.683271	0.0848329	0.871456	0.321848	0.0901227	0.00397616	0.286931	0.143824	0.00298315	0.000995856	0.0153569	0.0819113	0.00106374	0.000868769	0.204719	2.94052e-09		0.000123786	1.09836e-07	5.97573e-05
	miR-99b	Spearman's ρ	.559**	.386**	.284*	.315*	0.238075	0.152882	0.232258	.455**	0.150397	0.00576415	.379**	0.193813	.448**	.275*	0.113432	.435**	.592**	.293*	0.167266	0.230249	.295*	.579**	.294*	.496**	.429**	.378**	.418**	.472**	1	.362**	.519**
		p (two-sided)	2.7892e-06	0.00210155	0.02656	0.0132919	0.064657	0.239485	0.0716738	0.00022737	0.247301	0.964834	0.00257479	0.134486	0.000294413	0.0320359	0.384072	0.00046589	5.05811e-07	0.0218692	0.197585	0.0742345	0.0210835	1.00845e-06	0.0215471	4.89234e-05	0.00055473	0.0026849	0.000795963	0.000123786		0.00410863	1.80484e-05
	miR-518a-5p	Spearman's ρ	.392**	.331**	0.020201	.309*	-0.0257536	0.164093	.412**	.502**	0.141565	-0.0983078	.277*	0.0618191	0.211423	-0.116922	-0.166103	0.124326	0.241301	.277*	0.175886	.391**	.387**	.370**	0.219196	.417**	.442**	0.169223	.650**	.618**	.362**	1	.440**
		p (two-sided)	0.00178118	0.00917364	0.877195	0.0152283	0.843817	0.206345	0.00095544	3.69092e-05	0.276472	0.450998	0.0304864	0.636008	0.101913	0.369514	0.200766	0.339761	0.0610106	0.0306517	0.175134	0.00181197	0.00204115	0.00334928	0.0896458	0.000828851	0.00035896	0.192317	1.43203e-08	1.09836e-07	0.00410863		0.000390175
	miR-1244	Spearman's ρ	.636**	.291*	0.0519831	.314*	0.0764146	-0.0120571	.369**	.550**	0.216552	-0.0665785	.292*	.345**	.571**	0.132681	0.013908	0.227604	.556**	.386**	0.1945	0.235061	.380**	.645**	.511**	.469**	.275*	.380**	.457**	.491**	.519**	.440**	1
		p (two-sided)	3.59405e-08	0.0228862	0.690725	0.0136213	0.558328	0.92652	0.00339836	4.31945e-06	0.0936811	0.610189	0.0222713	0.0064178	1.51872e-06	0.308037	0.915279	0.0777141	3.27097e-06	0.0021177	0.133083	0.0682207	0.00254407	2.04311e-08	2.5932e-05	0.000136159	0.0321047	0.00255172	0.000215193	5.97573e-05	1.80484e-05	0.000390175
**. Statistically signifficant p<0.01 (two-sided).
*. Statistically signifficant p<0.05 (two-sided).
